# Supplementary material for: Design strategy and preliminary antiproliferative investigation of a modified lignan skeleton derived from aryne and statin
Source: Royal Society of Chemistry journal article supplement (doi:10.1039/d4ob01264j), 2024-01-01

## Supplementary Information

### Design Strategy and preliminary antiproliferative investigation of modified lignan skeleton derived from aryne and statin

Yu Lei, Yinshan Wen, Xiaoliang Xu, Qiong Hu, Meng Chang, Ruihua Qiang, and Yimin Hu\*

*School of Chemistry and Materials Science, Anhui Normal University,*

*Wuhu, Anhui 241002, China*

*E-mail: yiminhu@ahnu.edu.cn*

## Contents

|                                                                      |     |
|----------------------------------------------------------------------|-----|
| 1. General Experimental Procedures.....                              | S2  |
| 2. Characterization Data for the New Compounds.....                  | S4  |
| 3. X-Ray Crystallographic Data of <b>3h</b> .....                    | S24 |
| 4. Cell Proliferation Assay.....                                     | S25 |
| 5. <sup>1</sup> H and <sup>13</sup> C Spectra for New Compounds..... | S26 |

## 1. General experimental procedures

All the catalytic reactions were performed under an argon atmosphere using the oven-dried Schlenk flask. The chemicals were purchased from Adamas-beta, Macklin reagent, TCI chemicals, and Bidepharm. All solvents and materials were pre-dried, redistilled or recrystallized before use.  $^1\text{H}$  and  $^{13}\text{C}$  NMR spectra were recorded on a Bruker Avance 300/400/500 spectrometer with  $\text{CDCl}_3$  as the solvent. Chemical shifts are reported in ppm by assigning TMS resonance in the  $^1\text{H}$  NMR spectra as 0.00 ppm and  $\text{CDCl}_3$  resonance in the  $^{13}\text{C}$  spectra as 77.16 ppm. Data for  $^1\text{H}$  NMR are reported as follows: chemical shift ( $\delta$  ppm), multiplicity (s = singlet, d = doublet, t = triplet, q = quartet, m = multiplet), coupling constant (Hz) and integration. Data for  $^{13}\text{C}$  NMR are recorded with broad-band proton decoupling technique and are reported in terms of chemical shift. Column chromatography was performed on silica gel 300–400 mesh. Thin-layer chromatography (TLC) was performed on silica gel plates (HSGF 254). Melting points were determined using a Gallenkamp melting point apparatus and are uncorrected. The FT-IR spectra were recorded from KBr pellets or thin film from  $\text{CHCl}_3$  on the NaCl window in the 4000-400  $\text{cm}^{-1}$  ranges on a Nicolet 5DX spectrometer. High-resolution mass spectra were recorded on an Agilent model G6220 mass spectrometer (APCI).

**X-ray structure analysis.** Crystal of compounds **3h** suitable for X-ray analysis were obtained via the slow diffusion of petroleum ether into their ethyl acetate solution. The vial containing this solution was placed, loosely capped, to promote the crystallization. A suitable crystal was chosen and mounted on a glass fiber using grease. Data were collected using a Bruker APEX-II CCD diffractometer operating at  $T = 293$  K. The determination of unit cell parameters and data collections were performed with Mo  $K\alpha$  radiation ( $\lambda$ ) at 0.71073 Å. The total number of runs and images was based on the strategy calculation from the program APEX2 (Bruker). The structure was solved by the structure solution program Olex2 (Dolomanov et al., 2009), and the model was refined with version 2014/7 of ShelXL (Sheldrick, 2015) using full matrix least squares on  $F^2$  minimization.

### General procedure for preparation of tetraynes

#### Preparation of catalyst $\text{Pd}(\text{PPh}_3)_2\text{Cl}_2$

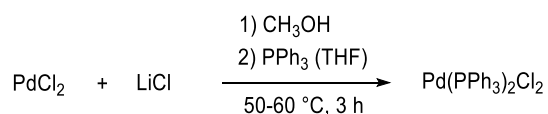

3.54 g  $\text{PdCl}_2$  and 4 g  $\text{LiCl}$  were mixed in a 500 mL three-necked flask with 150-200 mL methanol as solvent, magnetically stirred and heated in oil bath at 50-60  $^\circ\text{C}$ . After the solid was dissolved, 25 mL of THF (removed water with sodium wire) containing 13.1 g  $\text{PPh}_3$  were added in the above three-necked flask, and the color of the solution changed from brown to yellow, reflux reaction for 3 h. After reaction solution cooled, filtered and washed with anhydrous ethanol, yellow solid  $\text{Pd}(\text{PPh}_3)_2\text{Cl}_2$  catalyst was obtained finally.

#### Preparation of diyne substrates

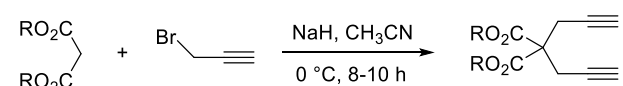

R = Me, Et,  $^i\text{Pr}$

10 g NaH (60%) and 200-300 mL acetonitrile were added in 500 mL three-necked flask with magnetic stirring. 100 mmol malonate and 30 g 3-bromopropyne (98%) were added in the above 500 mL three-necked flask dropwise in turn by separatory funnel, magnetically stirred for 8-10 h under ice-water bath. The organic phase was extracted with ethyl acetate and dried with anhydrous MgSO<sub>4</sub>. The solvent was evaporated in vacuo and diyne substrates as white solid were obtained finally.

### Preparation of brominated alkynes

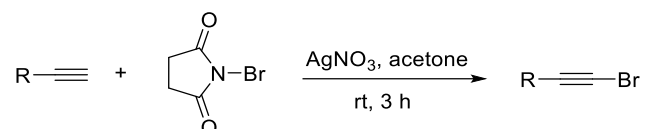

10.68 g 1-bromopyrrolidine-2,5-dione (NBS), 0.43 g AgNO<sub>3</sub>, and 50 mmol phenylacetylene or substituted phenylacetylene or alkyl alkyne were added in 250 mL three-necked flask in turn, 100 mL acetone as a solvent, magnetically stirred at room temperature for 3 h. The organic phase was extracted with n-hexane and dried with anhydrous MgSO<sub>4</sub>. The solvent was evaporated in vacuo and brominated alkynes compound as brown solid were obtained finally.

### Preparation of tetrayne substrates

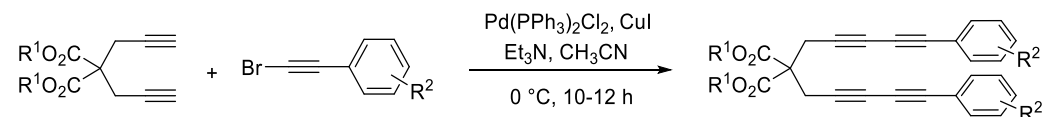

R<sup>1</sup> = Me, Et, <sup>i</sup>Pr

R<sup>2</sup> = H, *p*-Me, *p*-Et, *p*-Cl, *p*-F, *m*-Me

0.3 g Pd(PPh<sub>3</sub>)<sub>2</sub>Cl<sub>2</sub>, 0.25 g CuI and 20 mmol diyne substrate were added in 500 mL three-necked flask, protected with anhydrous anaerobic conditions under argon. After 0.5 h, 200-300 mL acetonitrile, 8.08 g Et<sub>3</sub>N and 50 mmol brominated aryl alkyne were added in turn, magnetically stirred for 10-12 h under ice-water bath. The organic phase was extracted with ethyl acetate and dried with anhydrous MgSO<sub>4</sub>. It was separated by column chromatography on silica gel to obtain tetrayne substrate as yellow solid finally.

### General procedure for preparation of compounds 3a-m, 4a-i, and 5a-f.

Tetrayne (0.2 mmol) and statin (1.2 equiv.) were mixed in a Teflon-lined cap sealed tube equipped with a magnetic stir bar and heated in a 110 °C oil bath in toluene (4 mL) for 8 hours. Then the reaction mixture was cooled to room temperature, quenched with saturated NaCl, and extracted with ethyl acetate (3 × 10 mL). The combined organic extracts were dried over anhydrous MgSO<sub>4</sub>, filtered, and concentrated under reduced pressure. The crude product was purified by column chromatography on silica gel (EtOAc : petroleum ether = 1: 20-40) to yield the product.

## General procedure for preparation of compounds 6a-c.

Tetrayne (1.0 mmol) and ethyl abietate **2d** (1.2 equiv) were mixed in an oven-dried Schlenk tube equipped with a magnetic stir bar and heated in a 90 °C oil bath in toluene (6 mL) for 8 hours. Then the reaction mixture was cooled to room temperature, quenched with saturated NaCl, and extracted with ethyl acetate (3 × 10 mL). The combined organic extracts were dried over anhydrous MgSO<sub>4</sub>, filtered, and concentrated under reduced pressure. The crude product was purified by column chromatography on silica gel (EtOAc : petroleum ether = 1: 20-40) to yield the product.

## 2. Characterization data for new compounds

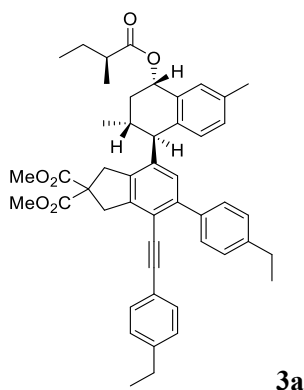

### Dimethyl 7-((1*R*,2*R*,4*S*)-2,6-dimethyl-4-((*S*)-2-methylbutanoyloxy)-1,2,3,4-tetrahydronaphthalen-1-yl)-5-(4-ethylphenyl)-4-((4-ethylphenyl)ethynyl)-1*H*-indene-2,2(3*H*)-dicarboxylate

colourless oil; (107 mg, 74% yield); TLC (petroleum ether/EtOAc = 15 : 1) : R<sub>f</sub> = 0.26.

**<sup>1</sup>H NMR** (500 MHz, CDCl<sub>3</sub>): δ 7.54 (d, *J* = 8.0 Hz, 2H), 7.29 (d, *J* = 8.1 Hz, 2H), 7.23 (d, *J* = 8.0 Hz, 2H), 7.13 (d, *J* = 8.1 Hz, 2H), 7.03 (s, 1H), 6.93 (s, 1H), 6.90 (d, *J* = 7.9 Hz, 1H), 6.61 (d, *J* = 8.0 Hz, 1H), 6.18 (dd, *J* = 10.2, 5.8 Hz, 1H), 3.86 (d, *J* = 17.2 Hz, 1H), 3.79 (d, *J* = 6.7 Hz, 1H), 3.78 (s, 3H), 3.74 (d, *J* = 10.6 Hz, 1H), 3.69 (s, 3H), 3.54 (d, *J* = 15.9 Hz, 1H), 3.20 (s, 1H), 2.69 (q, *J* = 7.6 Hz, 2H), 2.64 (q, *J* = 7.6 Hz, 2H), 2.54-2.47 (m, 1H), 2.37-2.33 (m, 1H), 2.29 (s, 3H), 2.23-2.15 (m, 1H), 1.83-1.77 (m, 1H), 1.67-1.63 (m, 1H), 1.60-1.54 (m, 1H), 1.27 (t, *J* = 7.7 Hz, 3H), 1.24 (d, *J* = 7.0 Hz, 3H), 1.22 (t, *J* = 7.6 Hz, 3H), 1.01 (t, *J* = 7.4 Hz, 3H), 0.98 (d, *J* = 6.5 Hz, 3H). **<sup>13</sup>C NMR** (125 MHz, CDCl<sub>3</sub>): δ 176.9, 172.2, 172.0, 144.7, 143.8, 143.5, 142.9, 141.2, 137.8, 136.6, 135.9, 135.6, 131.5, 129.4, 128.8, 128.0, 127.5, 126.8, 121.0, 116.3, 96.2, 86.8, 71.0, 59.9, 53.2, 53.0, 41.7, 41.2, 40.0, 37.7, 29.0, 28.8, 26.9, 21.2, 20.5, 16.9, 15.7, 15.5, 11.9. **FT-IR** (KBr): ν 2966, 2936, 2337, 2314, 1727, 1518, 1426, 1368, 1213, 1084, 803 cm<sup>-1</sup>. **HRMS** (APCI): *m/z* calcd for C<sub>48</sub>H<sub>52</sub>O<sub>6</sub> [M+H]<sup>+</sup> 725.3837, found 725.3828.

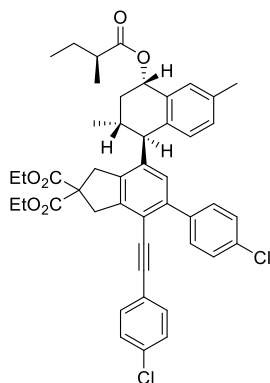

**3b**

**Diethyl 5-(4-chlorophenyl)-4-((4-chlorophenyl)ethynyl)-7-((1*R*,2*R*,4*S*)-2,6-dimethyl-4-((*S*)-2-methylbutanoyloxy)-1,2,3,4-tetrahydronaphthalen-1-yl)-1*H*-indene-2,2(3*H*)-dicarboxylate**

colourless oil; (131 mg, 86% yield); TLC (petroleum ether/EtOAc = 15 : 1) :  $R_f$  = 0.30.

**$^1\text{H NMR}$**  (500 MHz,  $\text{CDCl}_3$ ):  $\delta$  7.50 (d,  $J$  = 8.3 Hz, 2H), 7.36 (d,  $J$  = 8.1 Hz, 2H), 7.26 (s, 4H), 7.04 (s, 1H), 6.90 (d,  $J$  = 9.1 Hz, 2H), 6.58 (d,  $J$  = 7.9 Hz, 1H), 6.18 (dd,  $J$  = 10.3, 5.7 Hz, 1H), 4.28-4.14 (m, 4H), 3.84-3.72 (m, 3H), 3.57 (d,  $J$  = 16.4 Hz, 1H), 3.25 (s, 1H), 2.54-2.47 (m, 1H), 2.40-2.31 (m, 1H), 2.28 (s, 3H), 2.23-2.14 (m, 1H), 1.83-1.76 (m, 1H), 1.68-1.63 (m, 1H), 1.60-1.57 (m, 1H), 1.28 (d,  $J$  = 5.9 Hz, 3H), 1.25 (t,  $J$  = 6.3 Hz, 3H), 1.22 (t,  $J$  = 7.4 Hz, 3H), 1.01 (t,  $J$  = 7.5 Hz, 3H), 0.98 (d,  $J$  = 6.5 Hz, 3H).

**$^{13}\text{C NMR}$**  (125 MHz,  $\text{CDCl}_3$ ):  $\delta$  176.8, 171.6, 171.5, 141.8, 138.8, 136.4, 136.0, 135.7, 134.4, 133.58, 132.7, 130.8, 129.3, 128.8, 128.2, 126.8, 121.9, 115.8, 95.0, 88.0, 70.9, 62.1, 62.0, 59.9, 41.7, 41.0, 39.9, 37.7, 31.6, 30.3, 26.9, 21.2, 20.5, 16.9, 14.2, 14.1, 11.9. **FT-IR** (KBr):  $\nu$  2964, 2925, 2331, 2326, 1712, 1522, 1407, 1328, 1217, 1084, 792  $\text{cm}^{-1}$ . **HRMS** (APCI):  $m/z$  calcd for  $\text{C}_{46}\text{H}_{46}\text{Cl}_2\text{O}_6$   $[\text{M}+\text{H}]^+$  765.2744, found 765.2735.

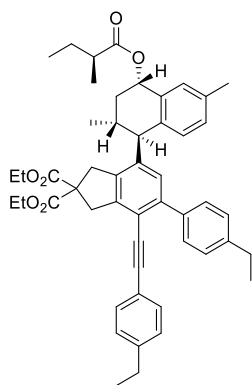

**3c**

**Diethyl 7-((1*R*,2*R*,4*S*)-2,6-dimethyl-4-((*S*)-2-methylbutanoyloxy)-1,2,3,4-tetrahydronaphthalen-1-yl)-5-(4-ethylphenyl)-4-((4-ethylphenyl)ethynyl)-1*H*-indene-2,2(3*H*)-dicarboxylate**

colourless oil; (111 mg, 74% yield); TLC (petroleum ether/EtOAc = 15 : 1) :  $R_f$  = 0.32.

**$^1\text{H NMR}$**  (500 MHz,  $\text{CDCl}_3$ ):  $\delta$  7.53 (d,  $J$  = 8.0 Hz, 2H), 7.29 (d,  $J$  = 8.0 Hz, 2H), 7.23 (d,  $J$  = 8.0 Hz, 2H), 7.13 (d,  $J$  = 8.0 Hz, 2H), 7.03 (s, 1H), 6.92-6.88 (m, 2H), 6.61 (d,  $J$  = 8.0 Hz, 1H), 6.18 (dd,  $J$  = 10.3, 5.9 Hz, 1H), 4.26-4.14

(m, 4H), 3.85 (d,  $J = 17.3$  Hz, 1H), 3.78-3.74 (m, 2H), 3.56 (d,  $J = 16.2$  Hz, 1H), 3.24 (s, 1H), 2.69 (q,  $J = 7.6$  Hz, 2H), 2.64 (q,  $J = 7.7$  Hz, 2H), 2.50 (dd,  $J = 13.9, 6.9$  Hz, 1H), 2.37-2.34 (m, 1H), 2.28 (s, 3H), 2.23-2.17 (m, 1H), 1.83-1.77 (m, 1H), 1.65-1.63 (m, 1H), 1.58-1.56 (m, 1H), 1.28 (d,  $J = 6.9$  Hz, 3H), 1.27-1.26 (m, 3H), 1.25-1.24 (m, 3H), 1.23-1.22 (m, 3H), 1.22-1.20 (m, 3H), 1.01 (t,  $J = 7.5$  Hz, 3H), 0.98 (d,  $J = 6.5$  Hz, 3H).  $^{13}\text{C}$  NMR (125 MHz,  $\text{CDCl}_3$ ):  $\delta$  176.9, 171.8, 171.7, 144.7, 144.0, 143.5, 142.9, 141.2, 138.0, 137.9, 136.7, 135.8, 135.6, 131.5, 129.5, 129.4, 128.8, 128.0, 127.5, 126.8, 121.0, 116.3, 96.1, 86.9, 71.0, 62.0, 61.9, 59.9, 41.7, 41.1, 39.9, 37.7, 29.0, 28.8, 26.9, 21.2, 20.5, 16.9, 15.7, 15.5, 14.2, 14.1, 11.9. **FT-IR** (KBr):  $\nu$  2966, 2925, 2324, 2328, 1717, 1532, 1417, 1338, 1207, 1094, 832  $\text{cm}^{-1}$ . **HRMS** (APCI):  $m/z$  calcd for  $\text{C}_{50}\text{H}_{56}\text{O}_6$   $[\text{M}+\text{H}]^+$  753.4150, found 753.4142.

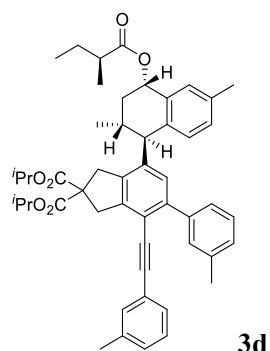

**Diisopropyl 17-(((1R,2R,4S)-2,6-dimethyl-4-(((S)-2-methylbutanoyl)oxy)-1,2,3,4-tetrahydronaphthalen-1-yl)-5-(*m*-tolyl)-4-(*m*-tolylethynyl)-1*H*-indene-2,2(3*H*)-dicarboxylate**

colourless oil; (132 mg, 72% yield); TLC (petroleum ether/EtOAc = 20 : 1) :  $R_f = 0.28$ .

$^1\text{H}$  NMR (500 MHz,  $\text{CDCl}_3$ ):  $\delta$  7.44 (s, 1H), 7.39 (d,  $J = 7.7$  Hz, 1H), 7.29 (t,  $J = 7.6$  Hz, 1H), 7.18-7.15 (m, 4H), 7.10 (d,  $J = 6.8$  Hz, 1H), 7.03 (s, 1H), 6.91-6.89 (m, 2H), 6.62 (d,  $J = 8.0$  Hz, 1H), 6.19 (dd,  $J = 10.4, 5.7$  Hz, 1H), 5.12-5.07 (m, 1H), 5.05-5.00 (m, 1H), 3.83 (d,  $J = 17.3$  Hz, 1H), 3.77-3.74 (m, 2H), 3.57 (d,  $J = 16.5$  Hz, 1H), 3.29-3.19 (m, 1H), 2.52-2.48 (m, 1H), 2.40 (s, 3H), 2.37-2.33 (m, 1H), 2.32 (s, 3H), 2.27 (s, 3H), 2.24-2.20 (m, 1H), 1.83-1.77 (m, 1H), 1.68-1.63 (m, 1H), 1.60-1.56 (m, 1H), 1.26-1.24 (m, 12H), 1.18 (d,  $J = 6.2$  Hz, 3H), 1.01 (t,  $J = 7.6$  Hz, 3H), 0.99 (d,  $J = 6.9$  Hz, 3H).  $^{13}\text{C}$  NMR (125 MHz,  $\text{CDCl}_3$ ):  $\delta$  176.8, 171.3, 171.2, 144.1, 143.2, 141.3, 140.5, 138.3, 138.0, 137.4, 136.7, 135.9, 135.6, 132.1, 130.2, 129.5, 129.1, 128.9, 128.6, 128.3, 128.2, 127.9, 126.8, 126.6, 123.7, 116.2, 96.1, 87.2, 71.0, 69.4, 69.4, 59.8, 41.7, 41.1, 39.9, 37.8, 34.7, 29.8, 26.9, 21.7, 21.6, 21.6, 21.3, 21.2, 20.5, 16.9, 11.9. **FT-IR** (KBr):  $\nu$  2964, 2928, 2363, 2326, 1716, 1503, 1441, 1371, 1260, 1102, 807  $\text{cm}^{-1}$ . **HRMS** (APCI):  $m/z$  calcd for  $\text{C}_{50}\text{H}_{56}\text{O}_6$   $[\text{M}+\text{H}]^+$  753.4150, found 753.4143.

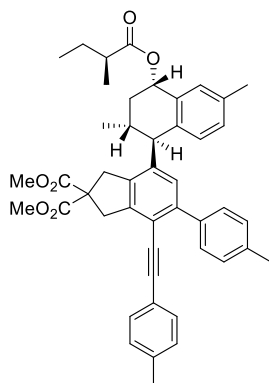

**3e**

**Dimethyl 7-((1*R*,2*R*,4*S*)-2,6-dimethyl-4-(((*S*)-2-methylbutanoyl)oxy)-1,2,3,4-tetrahydronaphthalen-1-yl)-5-(*p*-tolyl)-4-(*p*-tolylethynyl)-1*H*-indene-2,2(3*H*)-dicarboxylate**

colourless oil; (98 mg, 70% yield); TLC (petroleum ether/EtOAc =10 : 1) :  $R_f$  = 0.30.

$^1\text{H NMR}$  (500 MHz,  $\text{CDCl}_3$ ):  $\delta$  7.51 (d,  $J$  = 8.0 Hz, 2H), 7.28 (d,  $J$  = 8.1 Hz, 2H), 7.21 (d,  $J$  = 8.0 Hz, 2H), 7.11 (d,  $J$  = 7.9 Hz, 2H), 7.03 (s, 1H), 6.93-6.89 (m, 2H), 6.60 (d,  $J$  = 8.0 Hz, 1H), 6.18 (dd,  $J$  = 10.4, 5.6 Hz, 1H), 3.86 (d,  $J$  = 17.3 Hz, 2H), 3.78 (s, 3H), 3.74 (d,  $J$  = 10.1 Hz, 1H), 3.69 (s, 3H), 3.54 (d,  $J$  = 15.8 Hz, 1H), 3.26-3.15 (m, 1H), 2.52-2.48 (m, 1H), 2.39 (s, 3H), 2.37-2.36 (m, 1H), 2.35 (s, 3H), 2.29 (s, 3H), 2.23-2.17 (m, 1H), 1.83-1.77 (m, 1H), 1.63-1.60 (m, 1H), 1.59-1.54 (m, 1H), 1.24 (d,  $J$  = 7.1 Hz, 3H), 1.01 (t,  $J$  = 7.4 Hz, 3H), 0.98 (d,  $J$  = 6.5 Hz, 3H).  $^{13}\text{C NMR}$  (125 MHz,  $\text{CDCl}_3$ ):  $\delta$  176.9, 172.2, 172.0, 143.9, 142.9, 141.2, 138.4, 137.8, 137.6, 137.2, 136.6, 135.9, 135.6, 131.4, 129.5, 129.3, 129.2, 128.8, 128.7, 126.8, 120.7, 116.3, 96.1, 86.8, 71.0, 59.9, 53.2, 53.0, 41.7, 41.2, 40.0, 37.7, 34.5, 29.8, 26.9, 21.6, 21.4, 21.2, 20.5, 16.9. **FT-IR** (KBr):  $\nu$  2967, 2939, 2363, 2314, 1737, 1512, 1436, 1388, 1220, 1064, 808  $\text{cm}^{-1}$ . **HRMS** (APCI):  $m/z$  calcd for  $\text{C}_{46}\text{H}_{48}\text{O}_6$  [ $\text{M}+\text{H}$ ] $^+$  697.3524, found 697.3517.

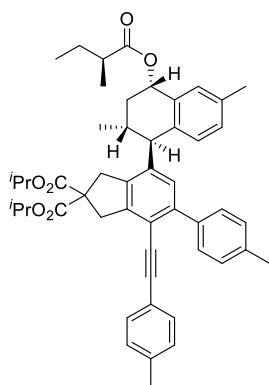

**3f**

**Diisopropyl 7-((1*R*,2*R*,4*S*)-2,6-dimethyl-4-(((*S*)-2-methylbutanoyl)oxy)-1,2,3,4-tetrahydronaphthalen-1-yl)-5-(*p*-tolyl)-4-(*p*-tolylethynyl)-1*H*-indene-2,2(3*H*)-dicarboxylate**

colourless oil; (112 mg, 74% yield); TLC (petroleum ether/EtOAc =15 : 1) :  $R_f$  = 0.30.

$^1\text{H NMR}$  (500 MHz,  $\text{CDCl}_3$ ):  $\delta$  7.50 (d,  $J$  = 8.0 Hz, 2H), 7.27 (d,  $J$  = 8.0 Hz, 2H), 7.20 (d,  $J$  = 8.0 Hz, 2H), 7.11 (d,  $J$  = 7.9 Hz, 2H), 7.02 (s, 1H), 6.89 (d,  $J$  = 6.1 Hz, 2H), 6.62 (d,  $J$  = 8.0 Hz, 1H),

6.18 (dd,  $J = 10.3, 5.8$  Hz, 1H), 5.11-5.06 (m, 1H), 5.04-4.99 (m, 1H), 3.81 (d,  $J = 17.3$  Hz, 1H), 3.76-3.72 (m, 2H), 3.56 (d,  $J = 16.5$  Hz, 1H), 3.28-3.17 (m, 1H), 2.52-2.46 (m, 1H), 2.38 (s, 3H), 2.37-2.36 (m, 1H), 2.35 (s, 3H), 2.27 (s, 3H), 2.22-2.17 (m, 1H), 1.83-1.77 (m, 1H), 1.65-1.63 (m, 1H), 1.58-1.55 (m, 1H), 1.27-1.24 (m, 12H), 1.17 (d,  $J = 6.3$  Hz, 3H), 1.01 (t,  $J = 7.5$  Hz, 3H), 0.98 (d,  $J = 6.5$  Hz, 3H).  $^{13}\text{C NMR}$  (125 MHz,  $\text{CDCl}_3$ ):  $\delta$  176.8, 171.3, 171.2, 144.1, 142.9, 141.2, 138.3, 138.1, 137.7, 137.1, 136.7, 135.9, 135.6, 131.4, 129.5, 129.4, 129.1, 128.9, 128.7, 126.8, 120.9, 116.2, 96.0, 86.9, 71.0, 69.4, 69.3, 59.8, 41.7, 41.1, 39.9, 37.7, 34.7, 29.9, 26.9, 21.7, 21.6, 21.6, 21.4, 21.2, 20.5, 16.9, 11.9. **FT-IR** (KBr):  $\nu$  2960, 2922, 2366, 2324, 1728, 1510, 1446, 1384, 1263, 1107, 810  $\text{cm}^{-1}$ . **HRMS** (APCI):  $m/z$  calcd for  $\text{C}_{50}\text{H}_{56}\text{O}_6$   $[\text{M}+\text{H}]^+$  753.4150, found 753.4142.

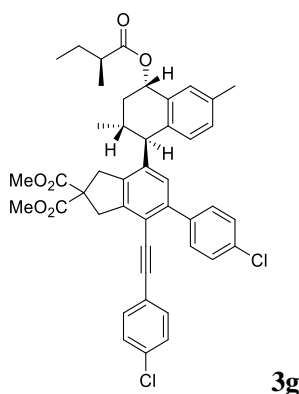

**Dimethyl 5-(4-chlorophenyl)-4-((4-chlorophenyl)ethynyl)-7-((1R,2R,4S)-2,6-dimethyl-4-((S)-2-methylbutanoxy)-1,2,3,4-tetrahydronaphthalen-1-yl)-1H-indene-2,2(3H)-dicarboxylate**

colourless oil; (122 mg, 83% yield); TLC (petroleum ether/EtOAc = 15 : 1) :  $R_f = 0.20$ .

$^1\text{H NMR}$  (500 MHz,  $\text{CDCl}_3$ ):  $\delta$  7.51 (d,  $J = 8.5$  Hz, 2H), 7.37 (d,  $J = 8.4$  Hz, 2H), 7.29 (s, 4H), 7.05 (s, 1H), 6.91 (d,  $J = 5.9$  Hz, 2H), 6.58 (d,  $J = 8.0$  Hz, 1H), 6.18 (dd,  $J = 10.4, 5.8$  Hz, 1H), 3.84 (d,  $J = 17.3$  Hz, 1H), 3.78 (s, 3H), 3.77-3.73 (m, 2H), 3.69 (s, 3H), 3.55 (d,  $J = 16.5$  Hz, 1H), 3.25-3.19 (m, 1H), 2.54-2.47 (m, 1H), 2.38-2.34 (m, 1H), 2.29 (s, 3H), 2.22-2.16 (m, 1H), 1.83-1.77 (m, 1H), 1.68-1.63 (m, 1H), 1.57-1.55 (m, 1H), 1.24 (d,  $J = 7.0$  Hz, 3H), 1.01 (t,  $J = 7.4$  Hz, 3H), 0.98 (d,  $J = 6.5$  Hz, 3H).  $^{13}\text{C NMR}$  (125 MHz,  $\text{CDCl}_3$ ):  $\delta$  176.9, 172.0, 141.9, 138.8, 136.3, 136.0, 135.7, 134.5, 133.7, 132.7, 130.8, 129.3, 128.9, 128.2, 126.9, 121.9, 115.8, 95.1, 87.9, 70.9, 59.9, 53.3, 53.1, 41.7, 41.1, 39.9, 37.7, 26.9, 21.3, 20.5, 16.9, 11.9. **FT-IR** (KBr):  $\nu$  2965, 2941, 2363, 2318, 1739, 1522, 1426, 1378, 1230, 1064, 1027, 818  $\text{cm}^{-1}$ . **HRMS** (APCI):  $m/z$  calcd for  $\text{C}_{44}\text{H}_{42}\text{Cl}_2\text{O}_6$   $[\text{M}+\text{H}]^+$  737.2431, found 737.2423.

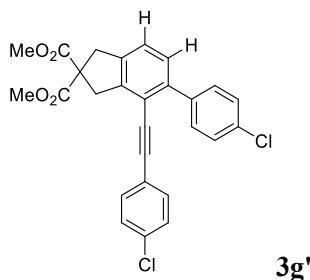

**Dimethyl 5-(4-chlorophenyl)-4-((4-chlorophenyl)ethynyl)-1,3-dihydro-2H-indene-2,2-dicarboxylate**



<sup>1</sup>H NMR (400 MHz, CDCl<sub>3</sub>): δ 7.55 (d, *J* = 8.5 Hz, 2H), 7.40 (d, *J* = 8.5 Hz, 2H), 7.29 (s, 4H), 7.23 (s, 2H), 3.81 (s, 2H), 3.79 (s, 6H), 3.69 (s, 2H). <sup>13</sup>C NMR (125 MHz, CDCl<sub>3</sub>): δ 172.1, 143.6, 141.5, 139.4, 139.0, 134.6, 133.6, 132.8, 130.8, 128.9, 128.6, 128.2, 124.5, 121.8, 117.7, 95.3, 87.8, 59.8, 53.3, 41.1, 41.0.

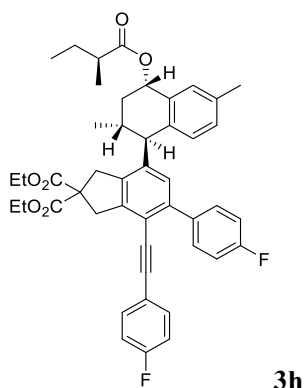

**Diethyl 7-((1*R*,2*R*,4*S*)-2,6-dimethyl-4-(((*S*)-2-methylbutanoyl)oxy)-1,2,3,4-tetrahydronaphthalen-1-yl)-5-(4-fluorophenyl)-4-((4-fluorophenyl)ethynyl)-1*H*-indene-2,2(3*H*)-dicarboxylate**

White solid; (120 mg, 82% yield); m.p. 126-128°C, TLC (petroleum ether/EtOAc =15 : 1) : R<sub>f</sub> = 0.30.

<sup>1</sup>H NMR (300 MHz, CDCl<sub>3</sub>): δ 7.56-7.52 (m, 2H), 7.35-7.30 (m, 2H), 7.11-6.97 (m, 5H), 6.91-6.89 (d, *J* = 7.7 Hz, 2H), 6.59 (d, *J* = 7.9 Hz, 1H), 6.19 (dd, *J* = 9.9, 5.9 Hz, 1H), 4.26-4.14 (m, 4H), 3.87-3.71 (m, 3H), 3.57 (d, *J* = 16.5 Hz, 1H), 3.23 (d, *J* = 16.4 Hz, 1H), 2.56-2.45 (m, 1H), 2.38-2.33 (m, 1H), 2.29 (s, 3H), 2.24-2.16 (m, 1H), 1.85-1.76 (m, 1H), 1.70-1.62 (m, 1H), 1.57 (s, 1H), 1.30-1.20 (m, 9H), 1.04-0.97 (m, 6H). <sup>13</sup>C NMR (125 MHz, CDCl<sub>3</sub>): δ 176.9, 171.7, 171.5, 163.5 (d, *J*<sub>C-F</sub> = 18.9 Hz), 161.6 (d, *J*<sub>C-F</sub> = 15.6 Hz), 144.1, 142.1, 141.6, 138.5, 136.5, 136.0, 135.7, 133.3 (d, *J*<sub>C-F</sub> = 8.3 Hz), 131.1 (d, *J*<sub>C-F</sub> = 7.9 Hz), 129.4, 128.8, 126.8, 119.6, 116.0, 115.8 (d, *J*<sub>C-F</sub> = 22.0 Hz), 114.8 (d, *J*<sub>C-F</sub> = 21.2 Hz), 94.9, 86.8, 70.9, 62.0 (d, *J*<sub>C-F</sub> = 14.1 Hz), 59.9, 41.7, 41.0, 39.9, 37.7, 34.6, 26.9, 21.3, 20.5, 16.9, 14.2, 14.1, 11.9. FT-IR (KBr): ν 2968, 2944, 2333, 2324, 1737, 1532, 1426, 1348, 1217, 1084, 803 cm<sup>-1</sup>. HRMS (APCI): *m/z* calcd for C<sub>46</sub>H<sub>46</sub>F<sub>2</sub>O<sub>6</sub> [M+H]<sup>+</sup> 733.3335, found 733.3326.

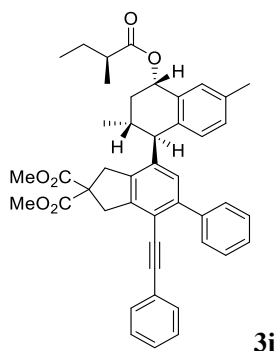

**Dimethyl 7-((1*R*,2*R*,4*S*)-2,6-dimethyl-4-(((*S*)-2-methylbutanoyl)oxy)-1,2,3,4-tetrahydronaphthalen-1-yl)-5-phenyl-4-(phenylethynyl)-1*H*-indene-2,2(3*H*)-dicarboxylate**

colourless oil; (97 mg, 73% yield); TLC (petroleum ether/EtOAc =15 : 1) : R<sub>f</sub> = 0.26.

<sup>1</sup>H NMR (500 MHz, CDCl<sub>3</sub>): δ 7.60 (d, *J* = 7.4 Hz, 2H), 7.41 (t, *J* = 7.6 Hz, 2H), 7.36-7.34 (m, 3H), 7.29-7.28 (m,

3H), 7.04 (s, 1H), 6.95 (s, 1H), 6.91 (d,  $J = 8.2$  Hz, 1H), 6.61 (d,  $J = 8.0$  Hz, 1H), 6.19 (dd,  $J = 10.3, 5.8$  Hz, 1H), 3.87 (d,  $J = 17.2$  Hz, 1H), 3.80 (d,  $J = 3.6$  Hz, 1H), 3.78 (s, 3H), 3.76 (d,  $J = 9.5$  Hz, 1H), 3.70 (s, 3H), 3.56 (d,  $J = 16.5$  Hz, 1H), 3.28-3.17 (m, 1H), 2.52-2.48 (m, 1H), 2.38-2.34 (m, 1H), 2.29 (s, 3H), 2.23-2.18 (m, 1H), 1.83-1.77 (m, 1H), 1.68-1.66 (m, 1H), 1.59-1.55 (m, 1H), 1.24 (d,  $J = 7.0$  Hz, 3H), 1.01 (t,  $J = 7.7$  Hz, 3H), 0.99 (d,  $J = 7.0, 3H$ ).  $^{13}\text{C NMR}$  (125 MHz,  $\text{CDCl}_3$ ):  $\delta$  176.9, 172.1, 143.2, 141.4, 140.5, 136.5, 135.9, 135.7, 131.5, 129.5, 129.4, 128.8, 128.4, 128.3, 128.0, 127.5, 126.9, 123.7, 116.2, 96.0, 87.3, 71.0, 59.9, 53.2, 53.0, 41.7, 41.2, 40.0, 37.8, 34.5, 26.9, 21.2, 20.5, 16.9, 11.9. **FT-IR** (KBr):  $\nu$  2960, 2934, 2343, 2314, 1717, 1532, 1416, 1358, 1227, 1074, 823  $\text{cm}^{-1}$ . **HRMS** (APCI):  $m/z$  calcd for  $\text{C}_{44}\text{H}_{44}\text{O}_6$   $[\text{M}+\text{H}]^+$  669.3211, found 669.3202.

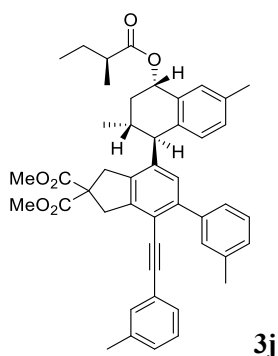

**Dimethyl 7-((1*R*,2*R*,4*S*)-2,6-dimethyl-4-(((*S*)-2-methylbutanoyl)oxy)-1,2,3,4-tetrahydronaphthalen-1-yl)-5-(*m*-tolyl)-4-(*m*-tolylethynyl)-1*H*-indene-2,2(3*H*)-dicarboxylate**

colourless oil; (92 mg, 66% yield); TLC (petroleum ether/EtOAc = 15 : 1) :  $R_f = 0.26$ .

$^1\text{H NMR}$  (500 MHz,  $\text{CDCl}_3$ ):  $\delta$  7.45 (s, 1H), 7.40 (d,  $J = 7.6$  Hz, 1H), 7.30 (t,  $J = 7.6$  Hz, 1H), 7.20-7.16 (m, 4H), 7.10 (d,  $J = 6.8$  Hz, 1H), 7.04 (s, 1H), 6.95 (s, 1H), 6.91 (d,  $J = 7.8$  Hz, 1H), 6.61 (d,  $J = 8.0$  Hz, 1H), 6.19 (dd,  $J = 10.3, 5.7$  Hz, 1H), 3.87 (d,  $J = 17.2$  Hz, 1H), 3.79 (s, 1H), 3.78 (s, 3H), 3.75 (d,  $J = 10.5$  Hz, 1H), 3.69 (s, 3H), 3.55 (d,  $J = 16.7$  Hz, 1H), 3.26-3.17 (m, 1H), 2.52-2.49 (m, 1H), 2.40 (s, 3H), 2.38-2.35 (m, 1H), 2.32 (s, 3H), 2.29 (s, 3H), 2.24-2.17 (m, 1H), 1.83-1.77 (m, 1H), 1.69-1.65 (d,  $J = 12.1$  Hz, 1H), 1.57-1.56 (m, 1H), 1.25 (d,  $J = 7.1$  Hz, 3H), 1.01 (t,  $J = 7.4$  Hz, 3H), 0.99 (d,  $J = 6.5$  Hz, 3H).  $^{13}\text{C NMR}$  (125 MHz,  $\text{CDCl}_3$ ):  $\delta$  176.9, 172.1, 172.0, 143.9, 143.2, 141.3, 140.4, 138.1, 137.4, 136.6, 135.9, 135.6, 132.1, 130.2, 129.4, 129.2, 128.8, 128.6, 128.3, 128.2, 127.9, 126.8, 126.6, 123.6, 116.3, 96.2, 87.1, 71.0, 59.9, 53.2, 53.0, 41.7, 41.2, 40.0, 37.8, 34.5, 29.9, 26.9, 21.7, 21.4, 21.2, 20.5, 16.9, 11.9. **FT-IR** (KBr):  $\nu$  2960, 2934, 2343, 2314, 1717, 1532, 1416, 1358, 1227, 1074, 823  $\text{cm}^{-1}$ . **HRMS** (APCI):  $m/z$  calcd for  $\text{C}_{46}\text{H}_{48}\text{O}_6$   $[\text{M}+\text{H}]^+$  697.3524, found 697.3516.

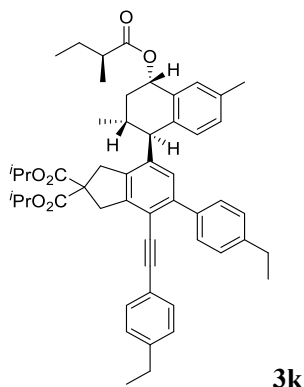

**Diisopropyl 7-((1*R*,2*R*,4*S*)-2,6-dimethyl-4-(((*S*)-2-methylbutanoyl)oxy)-1,2,3,4-tetrahydronaphthalen-1-yl)-5-(4-ethylphenyl)-4-((4-ethylphenyl)ethynyl)-1*H*-indene-2,2(3*H*)dicarboxylate**

colourless oil; (112 mg, 72% yield); TLC (petroleum ether/EtOAc = 15 : 1) :  $R_f$  = 0.30.

**$^1\text{H NMR}$**  (500 MHz,  $\text{CDCl}_3$ ):  $\delta$  7.52 (d,  $J$  = 8.1 Hz, 2H), 7.30-7.28 (m, 2H), 7.22 (d,  $J$  = 8.1 Hz, 2H), 7.13 (d,  $J$  = 8.1 Hz, 2H), 7.02 (s, 1H), 6.89 (d,  $J$  = 8.8 Hz, 2H), 6.62 (d,  $J$  = 7.9 Hz, 1H), 6.18 (dd,  $J$  = 10.3, 5.9 Hz, 1H), 5.11-5.06 (m, 1H), 5.04-4.99 (m, 1H), 3.83-3.72 (m, 3H), 3.56 (d,  $J$  = 16.5 Hz, 1H), 3.28-3.17 (m, 1H), 2.68 (q,  $J$  = 7.8 Hz, 2H), 2.64 (q,  $J$  = 7.7 Hz, 2H), 2.53-2.46 (m, 1H), 2.37-2.33 (m, 1H), 2.27 (s, 3H), 2.23-2.17 (m, 1H), 1.83-1.77 (m, 1H), 1.68-1.63 (m, 1H), 1.57-1.54 (m, 1H), 1.28-1.24 (m, 12H), 1.23-1.21 (m, 6H), 1.17 (d,  $J$  = 6.3 Hz, 3H), 1.01 (t,  $J$  = 7.5 Hz, 3H), 0.98 (d,  $J$  = 6.5 Hz, 3H).  **$^{13}\text{C NMR}$**  (125 MHz,  $\text{CDCl}_3$ ):  $\delta$  176.9, 171.3, 171.2, 144.6, 143.4, 142.9, 141.1, 138.1, 137.9, 136.7, 135.8, 135.6, 131.5, 129.5, 129.4, 128.8, 127.9, 127.4, 126.7, 121.1, 116.2, 96.0, 86.9, 71.0, 69.4, 69.3, 59.8, 51.6, 41.7, 41.0, 39.9, 37.7, 29.0, 28.7, 26.9, 21.7, 21.6, 21.6, 21.2, 20.5, 16.9, 15.7, 15.5, 11.9. **FT-IR** (KBr):  $\nu$  2964, 2926, 2360, 2322, 1718, 1503, 1451, 1381, 1267, 1112, 804  $\text{cm}^{-1}$ . **HRMS** (APCI):  $m/z$  calcd for  $\text{C}_{52}\text{H}_{60}\text{O}_6$   $[\text{M}+\text{H}]^+$  781.4463, found 781.4455.

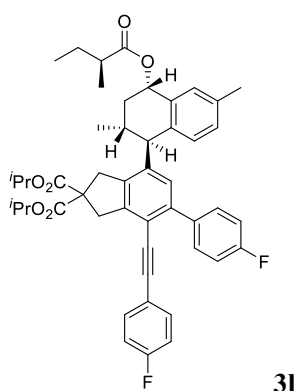

**Diisopropyl 7-((1*R*,2*R*,4*S*)-2,6-dimethyl-4-(((*S*)-2-methylbutanoyl)oxy)-1,2,3,4-tetrahydronaphthalen-1-yl)-5-(4-fluorophenyl)-4-((4-fluorophenyl)ethynyl)-1*H*-indene-2,2(3*H*)-dicarboxylate**

colourless oil; (130 mg, 85% yield); TLC (petroleum ether/EtOAc = 15 : 1) :  $R_f$  = 0.28.

**$^1\text{H NMR}$**  (500 MHz,  $\text{CDCl}_3$ ):  $\delta$  7.55-7.52 (m, 2H), 7.33-7.30 (m, 2H), 7.08 (t,  $J$  = 8.7 Hz, 2H), 7.04 (s, 1H), 7.00 (t,

$J = 8.7$  Hz, 2H), 6.90 (d,  $J = 8.6$  Hz, 1H), 6.87 (s, 1H), 6.60 (d,  $J = 7.9$  Hz, 1H), 6.18 (dd,  $J = 10.5, 5.7$  Hz, 1H), 5.11-5.06 (m, 1H), 5.05-5.00 (m, 1H), 3.82-3.71 (m, 3H), 3.57 (d,  $J = 16.6$  Hz, 1H), 3.29-3.16 (m, 1H), 2.54-2.47 (m, 1H), 2.38-2.34 (m, 1H), 2.28 (s, 3H), 2.23-2.15 (m, 1H), 1.84-1.76 (m, 1H), 1.68-1.63 (m, 1H), 1.61-1.57 (m, 1H), 1.27-1.24 (m, 12H), 1.18 (d,  $J = 6.3$  Hz, 3H), 1.01 (t,  $J = 7.4$  Hz, 3H), 0.98 (d,  $J = 6.5$  Hz, 3H).  $^{13}\text{C}$  NMR (125 MHz,  $\text{CDCl}_3$ ):  $\delta$  176.9, 171.2, 171.1, 163.5 (d,  $J_{\text{C-F}} = 18.9$  Hz), 161.6 (d,  $J_{\text{C-F}} = 15.4$  Hz), 144.1, 142.1, 141.6, 138.7, 136.5, 136.0, 135.7, 133.3 ((d,  $J_{\text{C-F}} = 8.3$  Hz)), 131.1 (d,  $J_{\text{C-F}} = 8.0$  Hz), 129.4, 128.9, 126.8, 119.7, 116.0, 115.8 (d,  $J_{\text{C-F}} = 21.9$  Hz), 114.8 (d,  $J_{\text{C-F}} = 21.3$  Hz), 94.9, 86.9, 71.0, 69.5 (d,  $J_{\text{C-F}} = 8.3$  Hz), 59.8, 51.5, 41.7, 41.0, 39.9, 37.7, 34.7, 29.9, 26.9, 21.7, 21.6, 21.6, 21.2, 20.5, 16.9, 11.9. **FT-IR** (KBr):  $\nu$  2964, 2928, 2360, 2324, 1725, 1507, 1456, 1384, 1260, 1113, 809  $\text{cm}^{-1}$ . **HRMS** (APCI):  $m/z$  calcd for  $\text{C}_{48}\text{H}_{50}\text{F}_2\text{O}_6$   $[\text{M}+\text{H}]^+$  761.3648, found 761.3639.

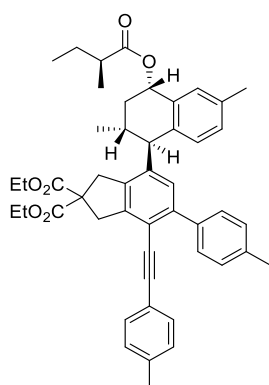

**3m**

**Diethyl 7-((1R,2R,4S)-2,6-dimethyl-4-(((S)-2-methylbutanoyl)oxy)-1,2,3,4-tetrahydronaphthalen-1-yl)-5-(p-tolyl)-4-(p-tolylethynyl)-1,3-dihydro-2H-indene-2,2-dicarboxylate**

colourless oil; (98 mg, 68% yield); TLC (petroleum ether/EtOAc = 15 : 1) :  $R_f = 0.34$ .

$^1\text{H}$  NMR (500 MHz,  $\text{CDCl}_3$ ):  $\delta$  7.51 (d,  $J = 7.9$  Hz, 2H), 7.27 (d,  $J = 7.9$  Hz, 2H), 7.20 (d,  $J = 7.9$  Hz, 2H), 7.11 (d,  $J = 7.9$  Hz, 2H), 7.03 (s, 1H), 6.94-6.86 (m, 2H), 6.61 (d,  $J = 8.0$  Hz, 1H), 6.18 (dd,  $J = 10.1, 5.8$  Hz, 1H), 4.28-4.11 (m, 4H), 3.85 (d,  $J = 17.3$  Hz, 1H), 3.80-3.72 (m, 2H), 3.56 (d,  $J = 16.4$  Hz, 1H), 3.29-3.14 (m, 1H), 2.53-2.47 (m, 1H), 2.38 (s, 3H), 2.37-2.35 (m, 1H), 2.34 (s, 3H), 2.28 (s, 3H), 2.24-2.18 (m, 1H), 1.83-1.76 (m, 1H), 1.68-1.62 (m, 1H), 1.58-1.54 (m, 1H), 1.27-1.25 (m, 6H), 1.21 (d,  $J = 7.1$  Hz, 3H), 1.01 (t,  $J = 7.5$  Hz, 3H), 0.98 (d,  $J = 6.6$  Hz, 3H).  $^{13}\text{C}$  NMR (125 MHz,  $\text{CDCl}_3$ ):  $\delta$  176.9, 171.8, 171.6, 144.0, 142.8, 141.2, 138.3, 138.0, 137.6, 137.1, 136.6, 135.8, 135.6, 131.4, 129.5, 129.3, 129.1, 128.8, 128.7, 126.8, 120.8, 116.2, 96.0, 86.9, 71.0, 62.0, 61.9, 59.9, 51.7, 41.7, 41.1, 39.9, 37.7, 34.6, 29.9, 26.9, 21.6, 21.4, 21.2, 20.5, 16.9, 14.2, 14.1, 11.9. **FT-IR** (KBr):  $\nu$  2964, 2926, 2326, 2320, 1730, 1512, 1426, 1328, 1218, 1072, 810  $\text{cm}^{-1}$ . **HRMS** (APCI):  $m/z$  calcd for  $\text{C}_{48}\text{H}_{52}\text{O}_6$   $[\text{M}+\text{H}]^+$  725.3837, found 725.3831.

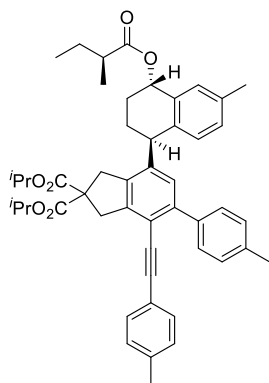

4a

**Diisopropyl 7-((1R,4S)-6-methyl-4-(((S)-2-methylbutanoyl)oxy)-1,2,3,4-tetrahydronaphthalen-1-yl)-5-(*p*-tolyl)-4-(*p*-tolylethynyl)-1*H*-indene-2,2(3*H*)-dicarboxylate**

colourless oil; (104 mg, 70% yield); TLC (petroleum ether/EtOAc =15 : 1) :  $R_f$  = 0.30.

$^1\text{H NMR}$  (500 MHz,  $\text{CDCl}_3$ ):  $\delta$  7.43 (d,  $J$  = 8.1 Hz, 2H), 7.25 (d,  $J$  = 8.2 Hz, 2H), 7.17 (d,  $J$  = 8.0 Hz, 2H), 7.10 (d,  $J$  = 8.0 Hz, 2H), 7.07 (s, 1H), 6.97 (d,  $J$  = 7.9 Hz, 1H), 6.80 (d,  $J$  = 7.9 Hz, 1H), 6.66 (s, 1H), 6.08 (t,  $J$  = 5.5 Hz, 1H), 5.12-5.08 (m, 1H), 5.07-5.03 (m, 1H), 4.26 (t,  $J$  = 6.2 Hz, 1H), 3.79 (s, 2H), 3.61 (d,  $J$  = 16.5 Hz, 1H), 3.44 (d,  $J$  = 16.5 Hz, 1H), 2.45-2.41 (m, 1H), 2.37 (s, 3H), 2.34 (s, 3H), 2.32-2.31 (m, 1H), 2.29 (s, 3H), 2.24-2.18 (m, 1H), 1.92-1.82 (m, 2H), 1.77-1.72 (m, 1H), 1.53-1.49 (m, 1H), 1.28-1.22 (m, 12H), 1.19 (d,  $J$  = 7.1 Hz, 3H), 0.95 (t,  $J$  = 7.4 Hz, 3H).  $^{13}\text{C NMR}$  (125 MHz,  $\text{CDCl}_3$ ):  $\delta$  176.6, 171.3, 144.0, 142.7, 142.1, 138.3, 137.8, 137.3, 137.1, 136.3, 136.1, 135.5, 131.4, 129.9, 129.4, 129.1, 128.9, 128.8, 128.6, 120.8, 116.2, 95.9, 86.9, 70.1, 69.4, 69.4, 59.9, 42.4, 41.6, 41.1, 39.6, 27.1, 27.1, 26.9, 21.7, 21.7, 21.6, 21.3, 21.2, 16.9, 11.8. **FT-IR** (KBr):  $\nu$  2964, 2932, 2347, 2334, 1718, 1532, 1431, 1327, 1241, 1074, 809  $\text{cm}^{-1}$ . **HRMS** (APCI):  $m/z$  calcd for  $\text{C}_{49}\text{H}_{54}\text{O}_6$   $[\text{M}+\text{H}]^+$  739.3993, found 739.3985.

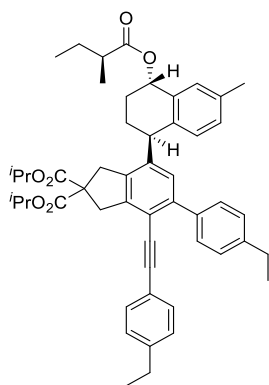

4b

**Diisopropyl 5-(4-ethylphenyl)-4-((4-ethylphenyl)ethynyl)-7-((1R,4S)-6-methyl-4-(((S)-2-methylbutanoyl)oxy)-1,2,3,4-tetrahydronaphthalen-1-yl)-1*H*-indene-2,2(3*H*)-dicarboxylate**

colourless oil; (104 mg, 68% yield); TLC (petroleum ether/EtOAc =15 : 1) :  $R_f$  = 0.30.

$^1\text{H NMR}$  (500 MHz,  $\text{CDCl}_3$ ):  $\delta$  7.45 (d,  $J$  = 7.3 Hz, 2H), 7.27 (d,  $J$  = 8.6 Hz, 2H), 7.20 (d,  $J$  = 7.7 Hz, 2H), 7.12 (d,  $J$  = 7.7 Hz, 2H), 7.07 (s, 1H), 6.97 (d,  $J$  = 7.8 Hz, 1H), 6.80 (d,  $J$  = 7.9 Hz, 1H), 6.67 (s, 1H), 6.08 (t,  $J$  = 5.4 Hz, 1H),

5.12-5.03 (m, 2H), 4.26 (t,  $J = 5.9$  Hz, 1H), 3.79 (s, 2H), 3.61 (d,  $J = 16.5$  Hz, 1H), 3.45 (d,  $J = 16.2$  Hz, 1H), 2.67 (q,  $J = 7.4$  Hz, 2H), 2.63 (q,  $J = 7.3$  Hz, 2H), 2.46-2.41 (m, 1H), 2.35-2.31 (m, 1H), 2.29 (s, 3H), 2.23-2.18 (m, 1H), 1.93-1.72 (m, 2H), 1.77-1.72 (m, 1H), 1.54-1.48 (m, 1H), 1.28-1.25 (m, 12H), 1.23-1.20 (m, 6H), 1.19 (d,  $J = 7.2$  Hz, 3H), 0.95 (t,  $J = 7.4$  Hz, 3H).  $^{13}\text{C NMR}$  (125 MHz,  $\text{CDCl}_3$ ):  $\delta$  176.7, 171.3, 144.6, 143.9, 143.4, 142.8, 142.0, 138.0, 137.3, 136.3, 136.1, 135.5, 131.5, 129.9, 129.4, 129.3, 128.9, 128.8, 127.9, 127.4, 121.1, 116.2, 95.9, 86.9, 70.1, 69.4, 69.4, 59.9, 42.4, 41.6, 41.1, 39.6, 29.0, 28.7, 27.1, 27.0, 26.9, 21.7, 21.7, 21.7, 21.2, 16.9, 15.7, 15.5, 11.8. **FT-IR** (KBr):  $\nu$  2960, 2931, 2357, 2324, 1734, 1509, 1456, 1385, 1246, 1154, 1074, 1021, 831  $\text{cm}^{-1}$ . **HRMS** (APCI):  $m/z$  calcd for  $\text{C}_{51}\text{H}_{58}\text{O}_6$   $[\text{M}+\text{H}]^+$  767.4306, found 767.4297.

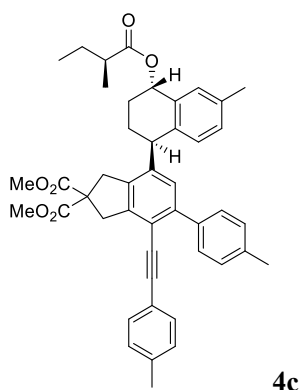

**Dimethyl 7-((1R,4S)-6-methyl-4-((S)-2-methylbutanoyloxy)-1,2,3,4-tetrahydronaphthalen-1-yl)-5-(p-tolyl)-4-(p-tolylolethynyl)-1H-indene-2,2(3H)-dicarboxylate**

Colourless oil; (90 mg, 66% yield); TLC (petroleum ether/EtOAc = 15 : 1) :  $R_f = 0.24$ .

$^1\text{H NMR}$  (500 MHz,  $\text{CDCl}_3$ ):  $\delta$  7.43 (d,  $J = 7.9$  Hz, 2H), 7.26 (d,  $J = 7.8$  Hz, 2H), 7.18 (d,  $J = 7.8$  Hz, 2H), 7.10 (d,  $J = 7.9$  Hz, 2H), 7.07 (s, 1H), 6.98 (d,  $J = 7.8$  Hz, 1H), 6.79 (d,  $J = 7.9$  Hz, 1H), 6.69 (s, 1H), 6.08 (t,  $J = 5.5$  Hz, 1H), 4.25 (t,  $J = 6.2$  Hz, 1H), 3.84 (s, 2H), 3.80 (s, 3H), 3.76 (s, 3H), 3.64 (d,  $J = 16.4$  Hz, 1H), 3.46 (d,  $J = 16.5$  Hz, 1H), 2.46-2.42 (m, 1H), 2.38 (s, 3H), 2.34 (s, 3H), 2.30 (s, 3H), 2.29-2.26 (m, 1H), 2.23-2.18 (m, 1H), 1.93-1.82 (m, 2H), 1.78-1.72 (m, 1H), 1.55-1.49 (m, 1H), 1.20 (d,  $J = 7.0$  Hz, 3H), 0.96 (t,  $J = 7.4$  Hz, 3H).  $^{13}\text{C NMR}$  (125 MHz,  $\text{CDCl}_3$ ):  $\delta$  176.7, 172.2, 172.2, 147.2, 143.7, 142.8, 142.1, 138.4, 137.6, 137.1, 136.3, 136.0, 135.6, 131.4, 129.8, 129.3, 129.1, 129.0, 128.9, 128.7, 124.6, 124.1, 120.7, 119.3, 116.2, 96.1, 86.8, 70.1, 59.8, 53.2, 53.2, 42.6, 41.6, 41.3, 39.8, 35.0, 34.7, 31.6, 30.4, 29.8, 27.1, 26.9, 21.6, 21.3, 21.2, 16.9, 11.8. **FT-IR** (KBr):  $\nu$  2966, 2929, 2342, 2334, 1718, 1542, 1446, 1355, 1236, 1154, 1094, 1021, 821  $\text{cm}^{-1}$ . **HRMS** (APCI):  $m/z$  calcd for  $\text{C}_{45}\text{H}_{46}\text{O}_6$   $[\text{M}+\text{H}]^+$  683.3367, found 683.3356.

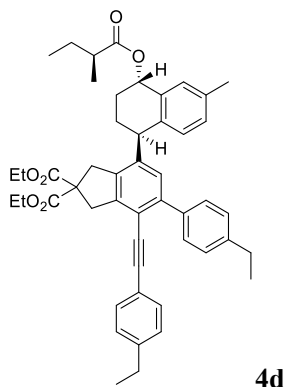

**Diethyl 5-(4-ethylphenyl)-4-((4-ethylphenyl)ethynyl)-7-((1R,4S)-6-methyl-4-(((S)-2-methylbutanoyl)oxy)-1,2,3,4-tetrahydronaphthalen-1-yl)-1H-indene-2,2(3H)-dicarboxylate**

colourless oil; (99 mg, 67% yield); TLC (petroleum ether/EtOAc =15 : 1) :  $R_f$  = 0.32.

**$^1\text{H NMR}$**  (500 MHz,  $\text{CDCl}_3$ ):  $\delta$  7.45 (d,  $J$  = 8.0 Hz, 2H), 7.28 (d,  $J$  = 8.0 Hz, 2H), 7.21 (d,  $J$  = 8.1 Hz, 2H), 7.12 (d,  $J$  = 8.1 Hz, 2H), 7.07 (s, 1H), 6.97 (d,  $J$  = 7.8 Hz, 1H), 6.80 (d,  $J$  = 7.9 Hz, 1H), 6.69 (s, 1H), 6.08 (t,  $J$  = 5.6 Hz, 1H), 4.29-4.22 (m, 4H), 4.20 (d,  $J$  = 7.1 Hz, 1H), 3.83 (s, 2H), 3.64 (d,  $J$  = 16.5 Hz, 1H), 3.47 (d,  $J$  = 16.5 Hz, 1H), 2.68 (q,  $J$  = 7.6 Hz, 2H), 2.63 (q,  $J$  = 7.6 Hz, 2H), 2.46-2.42 (m, 1H), 2.36-2.32 (m, 1H), 2.29 (s, 3H), 2.23-2.19 (m, 1H), 1.93-1.82 (m, 2H), 1.78-1.72 (m, 1H), 1.54-1.49 (m, 1H), 1.30 (d,  $J$  = 7.1 Hz, 3H), 1.26-1.23 (m, 6H), 1.20 (t,  $J$  = 7.0 Hz, 6H), 0.95 (t,  $J$  = 7.4 Hz, 3H).  **$^{13}\text{C NMR}$**  (125 MHz,  $\text{CDCl}_3$ ):  $\delta$  176.7, 171.8, 171.8, 144.6, 143.8, 143.4, 142.8, 142.0, 137.9, 137.2, 136.3, 136.0, 135.5, 131.5, 129.9, 129.4, 129.3, 128.9, 128.8, 127.9, 127.4, 121.0, 116.2, 96.0, 86.9, 70.0, 62.0, 61.9, 59.8, 42.4, 41.5, 41.1, 39.6, 29.8, 29.0, 28.7, 27.0, 26.8, 21.2, 16.9, 15.7, 15.5, 14.2, 14.2, 11.8. **FT-IR** (KBr):  $\nu$  2960, 2931, 2357, 2324, 1734, 1508, 1456, 1387, 1242, 1158, 1074, 1024, 831  $\text{cm}^{-1}$ . **HRMS** (APCI):  $m/z$  calcd for  $\text{C}_{49}\text{H}_{54}\text{O}_6$   $[\text{M}+\text{H}]^+$  739.3993, found 739.3987.

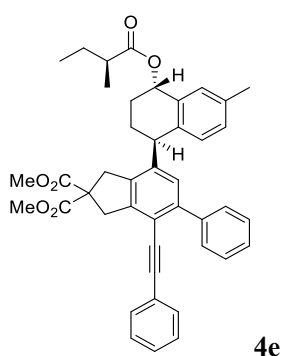

**Dimethyl 7-((1R,4S)-6-methyl-4-(((S)-2-methylbutanoyl)oxy)-1,2,3,4-tetrahydronaphthalen-1-yl)-5-phenyl-4-(phenylethynyl)-1H-indene-2,2(3H)-dicarboxylate**

colourless oil; (90 mg, 69% yield); TLC (petroleum ether/EtOAc =15 : 1) :  $R_f$  = 0.27.

**$^1\text{H NMR}$**  (500 MHz,  $\text{CDCl}_3$ ):  $\delta$  7.53 (d,  $J$  = 7.3 Hz, 2H), 7.38 (t,  $J$  = 7.4 Hz, 2H), 7.35-7.33 (m, 3H), 7.29-7.28 (m, 3H), 7.08 (s, 1H), 6.98 (d,  $J$  = 8.0 Hz, 1H), 6.79 (d,  $J$  = 8.0 Hz, 1H), 6.72 (s, 1H), 6.09 (t,  $J$  = 5.7 Hz, 1H), 4.26 (t,  $J$

= 6.3 Hz, 1H), 3.85 (s, 2H), 3.81 (s, 3H), 3.76 (s, 3H), 3.65 (d,  $J = 16.5$  Hz, 1H), 3.47 (d,  $J = 16.6$  Hz, 1H), 2.47-2.42 (m, 1H), 2.30 (s, 3H), 2.30-2.27 (m, 1H), 2.24-2.19 (m, 1H), 1.94-1.83 (m, 2H), 1.78-1.72 (m, 1H), 1.54-1.48 (m, 1H), 1.20 (d,  $J = 7.0$  Hz, 3H), 0.96 (t,  $J = 7.4$  Hz, 3H).  $^{13}\text{C}$  NMR (125 MHz,  $\text{CDCl}_3$ ):  $\delta$  176.7, 172.2, 143.8, 143.1, 142.4, 140.5, 137.4, 136.4, 136.0, 135.6, 131.5, 129.8, 129.5, 129.3, 129.0, 128.9, 128.4, 128.3, 128.0, 127.5, 123.7, 116.2, 95.9, 87.3, 70.1, 59.8, 53.3, 53.2, 42.6, 41.6, 41.2, 39.8, 27.2, 26.9, 21.2, 16.9, 11.8. **FT-IR** (KBr):  $\nu$  2967, 2931, 2348, 2329, 1734, 1568, 1458, 1347, 1242, 1128, 1084, 1028, 812  $\text{cm}^{-1}$ . **HRMS** (APCI):  $m/z$  calcd for  $\text{C}_{43}\text{H}_{42}\text{O}_6$   $[\text{M}+\text{H}]^+$  655.3054, found 655.3045.

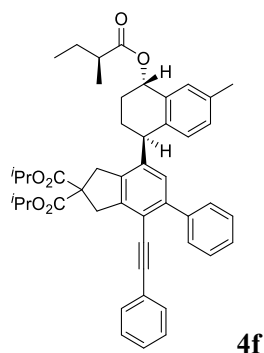

**Diethyl 7-((1R,4S)-6-methyl-4-(((S)-2-methylbutanoyl)oxy)-1,2,3,4-tetrahydronaphthalen-1-yl)-5-(4-propylphenyl)-4-(((4-propylphenyl)ethynyl)-1H-indene-2,2(3H)-dicarboxylate**

colourless oil; (109 mg, 77% yield); TLC (petroleum ether/EtOAc = 15 : 1) :  $R_f = 0.32$ .

$^1\text{H}$  NMR (500 MHz,  $\text{CDCl}_3$ ):  $\delta$  7.52 (d,  $J = 7.3$  Hz, 2H), 7.38 (t,  $J = 7.5$  Hz, 2H), 7.34-7.31 (m, 3H), 7.29-7.27 (m, 3H), 7.07 (s, 1H), 6.98 (d,  $J = 7.9$  Hz, 1H), 6.80 (d,  $J = 7.9$  Hz, 1H), 6.70 (s, 1H), 6.09 (t,  $J = 5.6$  Hz, 1H), 5.13-5.04 (m, 2H), 4.27 (t,  $J = 6.3$  Hz, 1H), 3.80 (s, 2H), 3.62 (d,  $J = 16.6$  Hz, 1H), 3.45 (d,  $J = 16.5$  Hz, 1H), 2.47-2.41 (m, 1H), 2.35-2.31 (m, 1H), 2.29 (s, 3H), 2.26-2.19 (m, 1H), 1.94-1.82 (m, 2H), 1.78-1.72 (m, 1H), 1.55-1.49 (m, 1H), 1.29-1.22 (m, 12H), 1.20 (d,  $J = 7.0$  Hz, 3H), 0.95 (t,  $J = 7.4$  Hz, 3H).  $^{13}\text{C}$  NMR (125 MHz,  $\text{CDCl}_3$ ):  $\delta$  176.6, 171.3, 144.1, 143.0, 142.3, 140.6, 137.7, 136.4, 136.0, 135.6, 131.5, 129.9, 129.5, 129.3, 128.9, 128.8, 128.4, 128.2, 127.9, 127.4, 123.8, 116.1, 95.7, 87.4, 71.8, 70.1, 69.5, 69.4, 62.2, 59.9, 42.5, 41.6, 41.0, 39.6, 29.9, 27.2, 27.1, 26.9, 22.7, 21.7, 21.7, 21.7, 21.2, 16.9, 14.1, 11.8. **FT-IR** (KBr):  $\nu$  2964, 2933, 2342, 2327, 1724, 1578, 1468, 1357, 1252, 1138, 1074, 1024, 823  $\text{cm}^{-1}$ . **HRMS** (APCI):  $m/z$  calcd for  $\text{C}_{47}\text{H}_{50}\text{O}_6$   $[\text{M}+\text{H}]^+$  711.3680, found 711.3689.



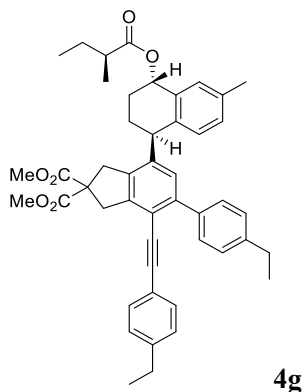

**Dimethyl 5-(4-ethylphenyl)-4-((4-ethylphenyl)ethynyl)-7-((1R,4S)-6-methyl-4-((S)-2-methylbutanoyl)oxy)-1,2,3,4-tetrahydronaphthalen-1-yl)-1H-indene-2,2(3H)-dicarboxylate**

colourless oil; (91 mg, 64 % yield); TLC (petroleum ether/EtOAc =15 : 1) :  $R_f$  = 0.26.

$^1\text{H NMR}$  (500 MHz,  $\text{CDCl}_3$ ):  $\delta$  7.45 (d,  $J$  = 7.8 Hz, 2H), 7.28 (d,  $J$  = 7.9 Hz, 2H), 7.21 (d,  $J$  = 7.9 Hz, 2H), 7.12 (d,  $J$  = 7.9 Hz, 2H), 7.07 (s, 1H), 6.98 (d,  $J$  = 7.9 Hz, 1H), 6.79 (d,  $J$  = 7.9 Hz, 1H), 6.71 (s, 1H), 6.08 (t,  $J$  = 5.4 Hz, 1H), 4.25 (t,  $J$  = 6.0 Hz, 1H), 3.84 (s, 2H), 3.80 (s, 3H), 3.75 (s, 3H), 3.65 (d,  $J$  = 16.5 Hz, 1H), 3.47 (d,  $J$  = 16.4 Hz, 1H), 2.68 (q,  $J$  = 7.7 Hz, 2H), 2.63 (q,  $J$  = 7.7 Hz, 2H), 2.46-2.41 (m, 1H), 2.30 (s, 3H), 2.29-2.26 (m, 1H), 2.24-2.19 (m, 1H), 1.92-1.83 (m, 2H), 1.78-1.72 (m, 1H), 1.55-1.49 (m, 1H), 1.26 (t,  $J$  = 7.6 Hz, 3H), 1.23-1.19 (m, 6H), 0.96 (t,  $J$  = 7.4 Hz, 3H).  $^{13}\text{C NMR}$  (125 MHz,  $\text{CDCl}_3$ ):  $\delta$  176.7, 172.2, 172.2, 144.7, 143.7, 143.5, 142.9, 142.1, 137.9, 137.1, 136.3, 136.0, 135.6, 131.5, 129.8, 129.4, 129.3, 129.0, 128.9, 128.0, 127.4, 121.0, 116.3, 96.1, 86.8, 70.1, 59.8, 53.2, 53.2, 42.6, 41.6, 41.3, 39.8, 29.8, 29.0, 28.7, 27.1, 26.9, 21.2, 16.9, 15.7, 15.5, 11.8. **FT-IR** (KBr):  $\nu$  2964, 2924, 2356, 2336, 1716, 1548, 1448, 1353, 1236, 1134, 1098, 1022, 818  $\text{cm}^{-1}$ . **HRMS** (APCI):  $m/z$  calcd for  $\text{C}_{47}\text{H}_{50}\text{O}_6$   $[\text{M}+\text{H}]^+$  711.3680, found 711.3687.

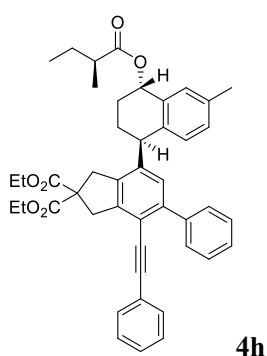

**Diethyl 7-((1R,4S)-6-methyl-4-((S)-2-methylbutanoyl)oxy)-1,2,3,4-tetrahydronaphthalen-1-yl)-5-phenyl-4-(phenylethynyl)-1H-indene-2,2(3H)-dicarboxylate**

colourless oil; (97 mg, 71 % yield); TLC (petroleum ether/EtOAc =15 : 1) :  $R_f$  = 0.35.

$^1\text{H NMR}$  (500 MHz,  $\text{CDCl}_3$ ):  $\delta$  7.52 (d,  $J$  = 7.2 Hz, 2H), 7.38 (t,  $J$  = 7.5 Hz, 2H), 7.35-7.32 (m, 3H), 7.29-7.27 (m, 3H), 7.07 (s, 1H), 6.98 (d,  $J$  = 8.0 Hz, 1H), 6.80 (d,  $J$  = 7.9 Hz, 1H), 6.71 (s, 1H), 6.09 (t,  $J$  = 5.7 Hz, 1H), 4.30-4.23

(m, 4H), 4.21 (d,  $J = 7.0$  Hz, 1H), 3.84 (s, 2H), 3.65 (d,  $J = 16.5$  Hz, 1H), 3.47 (d,  $J = 16.4$  Hz, 1H), 2.46-2.41 (m, 1H), 2.34-2.31 (m, 1H), 2.30 (s, 3H), 2.25-2.20 (m, 1H), 1.95-1.82 (m, 2H), 1.78-1.72 (m, 1H), 1.55-1.49 (m, 1H), 1.30 (t,  $J = 7.1$  Hz, 3H), 1.26 (t,  $J = 7.1$  Hz, 3H), 1.20 (d,  $J = 7.1$  Hz, 3H), 0.96 (t,  $J = 7.4$  Hz, 3H).  $^{13}\text{C}$  NMR (125 MHz,  $\text{CDCl}_3$ ):  $\delta$  176.7, 171.8, 144.0, 143.0, 142.3, 140.6, 137.6, 136.4, 136.0, 135.6, 131.5, 129.8, 129.5, 129.3, 128.9, 128.4, 128.2, 127.9, 127.4, 123.7, 116.1, 95.8, 87.4, 70.1, 62.1, 62.0, 59.8, 42.5, 41.6, 41.1, 39.7, 27.1, 26.9, 21.2, 16.9, 14.2, 14.2, 11.8. **FT-IR** (KBr):  $\nu$  2964, 2933, 2356, 2327, 1724, 1538, 1476, 1377, 1232, 1168, 1068, 1020, 825  $\text{cm}^{-1}$ . **HRMS** (APCI):  $m/z$  calcd for  $\text{C}_{45}\text{H}_{46}\text{O}_6$   $[\text{M}+\text{H}]^+$  683.3367, found 683.3359.

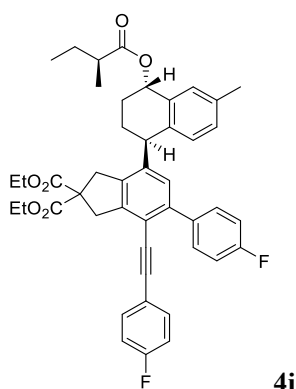

**Diethyl 5-(4-fluorophenyl)-4-((4-fluorophenyl)ethynyl)-7-((1*R*,4*S*)-6-methyl-4-(((*S*)-2-methylbutanoyl)oxy)-1,2,3,4-tetrahydronaphthalen-1-yl)-1*H*-indene-2,2(3*H*)-dicarboxylate**

colourless oil; (122 mg, 85% yield); TLC (petroleum ether/EtOAc = 15 : 1) :  $R_f$  = 0.35.

$^1\text{H}$  NMR (500 MHz,  $\text{CDCl}_3$ ):  $\delta$  7.48-7.45 (m, 2H), 7.32-7.29 (m, 2H), 7.08-7.04 (m, 3H), 6.99 (t,  $J = 8.8$  Hz, 3H), 6.78 (d,  $J = 7.9$  Hz, 1H), 6.67 (s, 1H), 6.09 (t,  $J = 5.8$  Hz, 1H), 4.30-4.23 (m, 4H), 4.20 (d,  $J = 7.1$  Hz, 1H), 3.81 (s, 2H), 3.64 (d,  $J = 16.5$  Hz, 1H), 3.45 (d,  $J = 16.5$  Hz, 1H), 2.47-2.43 (m, 1H), 2.30 (s, 3H), 2.29-2.26 (m, 1H), 2.24-2.18 (m, 1H), 1.92-1.83 (m, 2H), 1.78-1.72 (m, 1H), 1.55-1.49 (m, 1H), 1.30 (t,  $J = 7.1$  Hz, 3H), 1.26 (t,  $J = 7.1$  Hz, 3H), 1.20 (d,  $J = 7.0$  Hz, 3H), 0.96 (t,  $J = 7.4$  Hz, 3H).  $^{13}\text{C}$  NMR (125 MHz,  $\text{CDCl}_3$ ):  $\delta$  176.7, 171.7, 163.5 (d,  $J_{\text{C-F}} = 23.3$  Hz), 161.6 (d,  $J_{\text{C-F}} = 19.9$  Hz), 144.0, 142.5, 142.0, 137.8, 136.4, 135.9, 135.6, 133.3 (d,  $J_{\text{C-F}} = 8.2$  Hz), 131.1 (d,  $J_{\text{C-F}} = 7.9$  Hz), 129.7, 129.3, 128.8 (d,  $J_{\text{C-F}} = 8.2$  Hz), 116.0, 115.8 (d,  $J_{\text{C-F}} = 21.9$  Hz), 114.8 (d,  $J_{\text{C-F}} = 21.2$  Hz), 94.9, 86.8, 70.1, 62.1 (d,  $J_{\text{C-F}} = 7.8$  Hz), 59.9, 42.6, 41.6, 41.1, 39.7, 27.3, 26.9, 21.2, 16.9, 14.2, 14.2, 11.8. **FT-IR** (KBr):  $\nu$  2967, 2941, 2346, 2329, 1718, 1536, 1458, 1362, 1241, 1172, 1065, 1023, 805  $\text{cm}^{-1}$ . **HRMS** (APCI):  $m/z$  calcd for  $\text{C}_{45}\text{H}_{44}\text{F}_2\text{O}_6$   $[\text{M}+\text{H}]^+$  719.3179, found 719.3186.

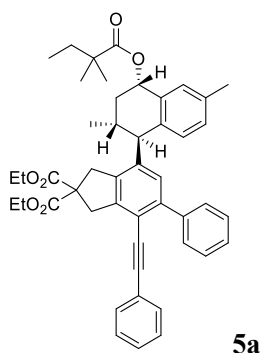

**Diethyl 7-((1*R*,2*R*,4*S*)-4-((2,2-dimethylbutanoyl)oxy)-2,6-dimethyl-1,2,3,4-tetrahydronaphthalen-1-yl)-5-phenyl-4-(phenylethynyl)-1*H*-indene-2,2(3*H*)-dicarboxylate**

colourless oil; (101 mg, 71% yield); TLC (petroleum ether/EtOAc = 15 : 1) :  $R_f$  = 0.29.

**$^1\text{H NMR}$**  (500 MHz,  $\text{CDCl}_3$ ):  $\delta$  7.60 (d,  $J$  = 7.3 Hz, 2H), 7.40 (t,  $J$  = 7.5 Hz, 2H), 7.37-7.34 (m, 3H), 7.30-7.28 (m, 3H), 7.03 (s, 1H), 6.94 (s, 1H), 6.91 (d,  $J$  = 7.8 Hz, 1H), 6.62 (d,  $J$  = 8.0 Hz, 1H), 6.16 (dd,  $J$  = 10.3, 5.8 Hz, 1H), 4.28-4.16 (m, 4H), 3.86 (d,  $J$  = 17.2 Hz, 1H), 3.80-3.76 (m, 2H), 3.57 (d,  $J$  = 16.5 Hz, 1H), 3.30-3.20 (m, 1H), 2.37-2.34 (m, 1H), 2.28 (s, 3H), 2.23-2.19 (m, 1H), 1.68-1.64 (m, 3H), 1.28-1.24 (m, 12H), 0.99 (d,  $J$  = 6.5 Hz, 3H), 0.94 (t,  $J$  = 7.5 Hz, 3H).  **$^{13}\text{C NMR}$**  (125 MHz,  $\text{CDCl}_3$ ):  $\delta$  178.1, 171.7, 171.6, 144.1, 143.1, 141.4, 140.5, 138.3, 136.5, 135.9, 135.8, 131.5, 129.5, 129.4, 128.8, 128.4, 128.2, 128.0, 127.5, 126.8, 123.7, 116.2, 95.9, 87.4, 71.0, 62.0, 61.9, 59.9, 51.7, 43.0, 41.1, 39.9, 37.6, 34.6, 33.4, 29.8, 25.0, 24.8, 21.2, 20.5, 14.2, 14.1, 9.5. **FT-IR** (KBr):  $\nu$  2964, 2935, 2314, 2330, 1722, 1542, 1432, 1313, 1207, 1074, 802  $\text{cm}^{-1}$ . **HRMS** (APCI):  $m/z$  calcd for  $\text{C}_{47}\text{H}_{50}\text{O}_6$   $[\text{M}+\text{H}]^+$  711.3680, found 711.3672.

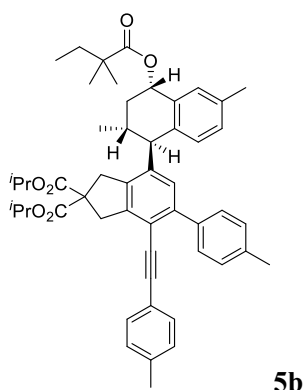

**Diisopropyl 7-((1*R*,2*R*,4*S*)-4-((2,2-dimethylbutanoyl)oxy)-2,6-dimethyl-1,2,3,4-tetrahydronaphthalen-1-yl)-5-(*p*-tolyl)-4-(*p*-tolylethynyl)-1*H*-indene-2,2(3*H*)-dicarboxylate**

White solid; (106 mg, 69% yield); m.p. 130-132 °C, TLC (petroleum ether/EtOAc = 15 : 1) :  $R_f$  = 0.28.

**$^1\text{H NMR}$**  (500 MHz,  $\text{CDCl}_3$ ):  $\delta$  7.50 (d,  $J$  = 8.0 Hz, 2H), 7.27 (d,  $J$  = 8.0 Hz, 2H), 7.20 (d,  $J$  = 7.9 Hz, 2H), 7.11 (d,  $J$  = 7.9 Hz, 2H), 7.02 (s, 1H), 6.89 (d,  $J$  = 4.3 Hz, 2H), 6.62 (d,  $J$  = 8.0 Hz, 1H), 6.15 (dd,  $J$  = 10.3, 5.8 Hz, 1H), 5.11-5.06 (m, 1H), 5.04-5.00 (m, 1H), 3.81 (d,  $J$  = 17.3 Hz, 1H), 3.77-3.72 (m, 2H), 3.56 (d,  $J$  = 16.5 Hz, 1H), 3.33-3.10

(m, 1H), 2.38 (s, 3H), 2.34 (s, 3H), 2.33-2.29 (m, 1H), 2.27 (s, 3H), 2.25-2.18 (m, 1H), 1.69-1.62 (m, 3H), 1.28-1.24 (m, 12H), 1.23 (s, 3H), 1.17 (d,  $J = 6.2$  Hz, 3H), 0.98 (d,  $J = 6.5$  Hz, 3H), 0.94 (t,  $J = 7.5$  Hz, 3H).  $^{13}\text{C}$  NMR (125 MHz,  $\text{CDCl}_3$ ):  $\delta$  178.1, 171.3, 171.2, 138.3, 137.1, 135.8, 131.4, 129.5, 129.4, 129.1, 128.8, 128.7, 126.8, 120.8, 116.2, 86.9, 71.0, 69.4, 69.3, 59.8, 43.0, 41.1, 39.9, 37.6, 33.4, 25.0, 24.8, 21.7, 21.6, 21.6, 21.4, 21.2, 20.6, 9.5. **FT-IR** (KBr):  $\nu$  2956, 2937, 2342, 2347, 1732, 1532, 1425, 1327, 1232, 1064, 801  $\text{cm}^{-1}$ . **HRMS** (APCI):  $m/z$  calcd for  $\text{C}_{51}\text{H}_{58}\text{O}_6$   $[\text{M}+\text{H}]^+$  767.4306, found 767.4301.

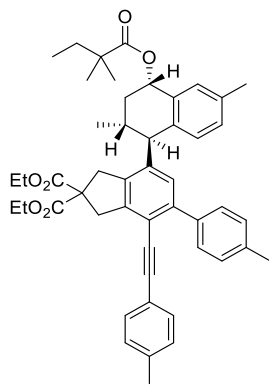

**5c**

**Diethyl 7-((1*R*,2*R*,4*S*)-4-((2,2-dimethylbutanoyl)oxy)-2,6-dimethyl-1,2,3,4-tetrahydronaphthalen-1-yl)-5-(*p*-tolyl)-4-(*p*-tolylethynyl)-1*H*-indene-2,2(3*H*)-dicarboxylate**

colourless oil; (99 mg, 67% yield); TLC (petroleum ether/EtOAc = 15 : 1) :  $R_f = 0.28$ .

$^1\text{H}$  NMR (500 MHz,  $\text{CDCl}_3$ ):  $\delta$  7.51 (d,  $J = 8.0$  Hz, 2H), 7.27 (d,  $J = 8.0$  Hz, 2H), 7.20 (d,  $J = 8.0$  Hz, 2H), 7.11 (d,  $J = 7.9$  Hz, 2H), 7.02 (s, 1H), 6.90 (d,  $J = 10.6$  Hz, 2H), 6.61 (d,  $J = 8.0$  Hz, 1H), 6.15 (dd,  $J = 10.3, 5.7$  Hz, 1H), 4.28-4.14 (m, 4H), 3.85 (d,  $J = 17.3$  Hz, 1H), 3.78-3.74 (m, 2H), 3.56 (d,  $J = 16.2$  Hz, 1H), 3.27-3.18 (m, 1H), 2.39 (s, 3H), 2.35 (s, 3H), 2.33-2.31 (m, 1H), 2.28 (s, 3H), 2.23-2.17 (m, 1H), 1.67-1.62 (m, 3H), 1.27-1.26 (m, 6H), 1.24-1.20 (m, 6H), 0.98 (d,  $J = 6.5$  Hz, 3H), 0.94 (t,  $J = 7.5$  Hz, 3H).  $^{13}\text{C}$  NMR (125 MHz,  $\text{CDCl}_3$ ):  $\delta$  178.1, 171.8, 171.7, 144.0, 142.8, 141.2, 138.3, 137.6, 137.1, 136.6, 135.8, 131.4, 129.5, 129.4, 129.2, 128.7, 128.7, 126.8, 120.8, 116.2, 96.0, 86.9, 71.0, 62.0, 61.9, 59.9, 43.0, 41.1, 39.9, 37.6, 34.5, 33.4, 25.0, 24.8, 21.6, 21.4, 21.3, 20.5, 14.2, 14.1, 9.5. **FT-IR** (KBr):  $\nu$  2971, 2945, 2324, 2343, 1732, 1532, 1422, 1323, 1227, 1084, 808  $\text{cm}^{-1}$ . **HRMS** (APCI):  $m/z$  calcd for  $\text{C}_{49}\text{H}_{54}\text{O}_6$   $[\text{M}+\text{H}]^+$  739.3993, found 739.3985.

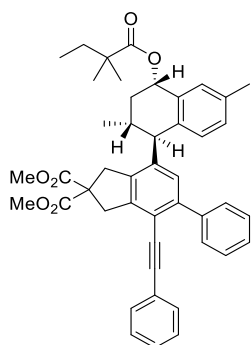

**5d**

**Dimethyl 7-((1*R*,2*R*,4*S*)-4-((2,2-dimethylbutanoyl)oxy)-2,6-dimethyl-1,2,3,4-tetrahydronaphthalen-1-yl)-5-phenyl-4-(phenylethynyl)-1*H*-indene-2,2(3*H*)-dicarboxylate**

colourless oil; (96 mg, 70% yield); TLC (petroleum ether/EtOAc =15 : 1) :  $R_f$  = 0.24.

$^1\text{H NMR}$  (500 MHz,  $\text{CDCl}_3$ ):  $\delta$  7.60 (d,  $J$  = 7.4 Hz, 2H), 7.41 (t,  $J$  = 7.5 Hz, 2H), 7.36-7.34 (m, 3H), 7.30-7.28 (m, 3H), 7.03 (s, 1H), 6.95 (s, 1H), 6.91 (d,  $J$  = 8.1 Hz, 1H), 6.61 (d,  $J$  = 8.0 Hz, 1H), 6.15 (dd,  $J$  = 10.2, 5.8 Hz, 1H), 3.89-3.80 (m, 2H), 3.78 (s, 3H), 3.76-3.73 (m, 1H), 3.70 (s, 3H), 3.56 (d,  $J$  = 16.1 Hz, 1H), 3.29-3.17 (m, 1H), 2.36-2.33 (m, 1H), 2.29 (s, 3H), 2.24-2.18 (m, 1H), 1.68-1.62 (m, 3H), 1.26 (s, 3H), 1.24 (s, 3H), 0.99 (d,  $J$  = 6.5 Hz, 3H), 0.94 (t,  $J$  = 7.5 Hz, 3H).  $^{13}\text{C NMR}$  (125 MHz,  $\text{CDCl}_3$ ):  $\delta$  178.1, 172.1, 172.0, 143.1, 141.5, 140.4, 138.2, 136.5, 135.9, 135.9, 131.5, 129.5, 129.4, 128.7, 128.4, 128.3, 128.0, 127.5, 126.8, 123.7, 116.2, 95.9, 87.3, 71.0, 59.9, 53.2, 53.1, 43.0, 41.2, 39.9, 37.6, 34.5, 33.4, 29.8, 25.0, 24.8, 21.3, 20.5, 9.5. **FT-IR** (KBr):  $\nu$  2963, 2932, 2337, 2328, 1715, 1516, 1432, 1317, 1218, 1064, 808  $\text{cm}^{-1}$ . **HRMS** (APCI):  $m/z$  calcd for  $\text{C}_{45}\text{H}_{46}\text{O}_6$   $[\text{M}+\text{H}]^+$  683.3367, found 683.3359.

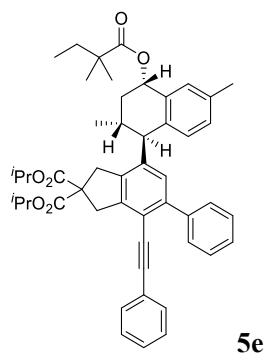

**Diisopropyl 7-((1*R*,2*R*,4*S*)-4-((2,2-dimethylbutanoyl)oxy)-2,6-dimethyl-1,2,3,4-tetra-hydronaphthalen-1-yl)-5-phenyl-4-(phenylethynyl)-1*H*-indene-2,2(3*H*)-dicarboxylate**

White solid; (112 mg, 76% yield); m.p. 132-134 °C; TLC (petroleum ether/EtOAc =15 : 1) :  $R_f$  = 0.24.

$^1\text{H NMR}$  (300 MHz,  $\text{CDCl}_3$ ):  $\delta$  7.59 (d,  $J$  = 7.2 Hz, 2H), 7.42-7.33 (m, 5H), 7.31-7.28 (m, 3H), 7.02 (s, 1H), 6.90 (d,  $J$  = 8.2 Hz, 2H), 6.62 (d,  $J$  = 7.9 Hz, 1H), 6.15 (dd,  $J$  = 9.9, 5.3 Hz, 1H), 5.13-4.98 (m, 2H), 3.80-3.72 (m, 3H), 3.57 (d,  $J$  = 16.4 Hz, 1H), 3.25 (d,  $J$  = 16.7 Hz, 1H), 2.37-2.32 (m, 1H), 2.27 (s, 3H), 2.22-2.16 (m, 1H), 1.69-1.59 (m, 3H), 1.28-1.24 (m, 12H), 1.23-1.15 (m, 6H), 0.99 (d,  $J$  = 6.4 Hz, 3H), 0.94 (t,  $J$  = 7.5 Hz, 3H).  $^{13}\text{C NMR}$  (125 MHz,  $\text{CDCl}_3$ ):  $\delta$  178.1, 171.3, 171.2, 143.1, 141.4, 140.5, 136.6, 135.9, 131.5, 129.5, 128.8, 128.4, 128.2, 127.9, 127.4, 126.8, 123.8, 116.1, 95.8, 87.4, 71.0, 69.5, 69.4, 59.8, 43.0, 41.0, 39.9, 37.6, 33.4, 25.0, 24.8, 21.7, 21.7, 21.6, 21.3, 20.6, 9.5. **FT-IR** (KBr):  $\nu$  2963, 2937, 2342, 2335, 1718, 1524, 1435, 1343, 1241, 1088, 821  $\text{cm}^{-1}$ . **HRMS** (APCI):  $m/z$  calcd for  $\text{C}_{49}\text{H}_{54}\text{O}_6$   $[\text{M}+\text{H}]^+$  739.3993, found 739.3985.

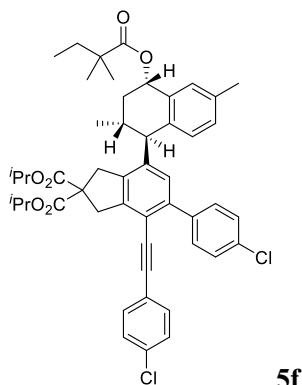

**Diisopropyl 5-(4-chlorophenyl)-4-((4-chlorophenyl)ethynyl)-7-((1*R*,2*R*,4*S*)-4-((2,2-dimethylbutanoyl)oxy)-2,6-dimethyl-1,2,3,4-tetrahydronaphthalen-1-yl)-1*H*-indene-2,2(3*H*)-dicarboxylate**

colourless oil; (136 mg, 84% yield); TLC (petroleum ether/EtOAc = 15 : 1) :  $R_f$  = 0.30.

**$^1\text{H NMR}$**  (500 MHz,  $\text{CDCl}_3$ ):  $\delta$  7.50 (d,  $J$  = 8.4 Hz, 2H), 7.36 (d,  $J$  = 8.4 Hz, 2H), 7.30-7.27 (m, 4H), 7.03 (s, 1H), 6.90 (d,  $J$  = 8.1 Hz, 1H), 6.87 (s, 1H), 6.59 (d,  $J$  = 8.0 Hz, 1H), 6.17-6.13 (m, 1H), 5.11-5.06 (m, 1H), 5.05-5.00 (m, 1H), 3.82-3.70 (m, 3H), 3.57 (d,  $J$  = 16.6 Hz, 1H), 3.31-3.19 (m, 1H), 2.36-2.32 (m, 1H), 2.28 (s, 3H), 2.22-2.16 (m, 1H), 1.68-1.62 (m, 3H), 1.29-1.24 (m, 12H), 1.24 (s, 3H), 1.18 (d,  $J$  = 6.3 Hz, 3H), 0.98 (d,  $J$  = 6.5 Hz, 3H), 0.94 (t,  $J$  = 7.5 Hz, 3H).  **$^{13}\text{C NMR}$**  (125 MHz,  $\text{CDCl}_3$ ):  $\delta$  172.0, 163.7, 163.6, 161.7, 156.5, 155.1, 148.5, 145.6, 143.3, 136.1, 134.1, 133.4, 133.3, 131.7, 131.1, 131.1, 124.8, 122.0, 120.9, 119.5, 116.8, 115.9, 115.7, 115.1, 114.9, 114.8, 112.9, 102.8, 94.8, 86.5, 59.6, 53.3, 41.5, 39.2, 39.1, 23.4. **FT-IR** (KBr):  $\nu$  2963, 2942, 2337, 2332, 1716, 1542, 1441, 1337, 1251, 1084, 821  $\text{cm}^{-1}$ . **HRMS** (APCI):  $m/z$  calcd for  $\text{C}_{49}\text{H}_{52}\text{Cl}_2\text{O}_6$   $[\text{M}+\text{H}]^+$  807.3214, found 807.3205.

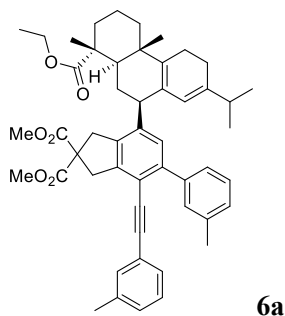

**Dimethyl 7-(1-(ethoxycarbonyl)-7-isopropyl-1,4a-dimethyl-1,2,3,4,4a,5,6,9,10,10a-decahydrophenanthren-9-yl)-5-(*m*-tolyl)-4-(*m*-tolylethynyl)-1,3-dihydro-2*H*-indene-2,2-dicarboxylate (1f)**

White solid; (606 mg, 79% yield); m. p. 112-113 °C; TLC (petroleum ether/EtOAc = 30 : 1):  $R_f$  = 0.26.

**$^1\text{H NMR}$**  (500 MHz,  $\text{CDCl}_3$ ):  $\delta$  7.44 (d,  $J$  = 7.3 Hz, 2H), 7.34 (t,  $J$  = 7.7 Hz, 1H), 7.21-7.17 (m, 4H), 7.10 (d,  $J$  = 6.7 Hz, 1H), 6.99 (s, 1H), 5.14 (s, 1H), 3.87 (t,  $J$  = 14.4 Hz, 2H), 3.82 (s, 3H), 3.80 (s, 3H), 3.74-3.71 (m, 2H), 3.58 (d,  $J$  = 16.5 Hz, 1H), 3.44 (d,  $J$  = 3.7 Hz, 1H), 3.15-3.09 (m, 1H), 2.42 (s, 3H), 2.32 (s, 3H), 2.29-2.21 (m, 2H), 2.18-2.13 (m, 2H), 2.09-2.05 (m, 2H), 1.91 (d,  $J$  = 13.1 Hz, 1H), 1.72-1.60 (m, 4H), 1.45 (d,  $J$  = 11.4 Hz, 1H), 1.26-1.21

(m, 2H), 1.15 (s, 3H), 1.10 (s, 3H), 0.99 (d,  $J = 2.8$  Hz, 3H), 0.97 (d,  $J = 2.7$  Hz, 3H), 0.65 (t,  $J = 7.1$  Hz, 3H).  $^{13}\text{C}$  NMR (125 MHz,  $\text{CDCl}_3$ ):  $\delta$  177.9, 172.3, 172.2, 144.1, 143.3, 142.1, 141.4, 141.1, 141.1, 138.1, 137.7, 137.4, 132.1, 130.6, 129.2, 129.1, 128.6, 128.3, 128.0, 127.9, 126.7, 125.4, 123.7, 120.8, 115.5, 95.8, 87.3, 77.2, 60.3, 59.9, 53.4, 53.2, 47.5, 41.7, 41.3, 40.6, 39.4, 37.7, 36.1, 35.9, 34.6, 27.9, 26.1, 22.6, 21.7, 21.3, 20.4, 18.6, 16.7, 13.5. **FT-IR** (KBr):  $\nu$  2360, 1734, 1717, 1655, 1558, 1458, 1381, 1241, 1175, 785, 668, 468, 422  $\text{cm}^{-1}$ . **HRMS** (APCI):  $m/z$  calcd for  $\text{C}_{51}\text{H}_{58}\text{O}_6$   $[\text{M}+\text{H}]^+$  767.4306, found 767.4313.

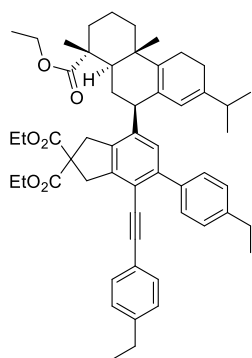

**6b**

**Diethyl 7-(1-(ethoxycarbonyl)-7-isopropyl-1,4a-dimethyl-1,2,3,4,4a,5,6,9,10,10a-decahydrophenanthren-9-yl)-5-(4-ethylphenyl)-4-((4-ethylphenyl)ethynyl)-1,3-dihydro-2H-indene-2,2-dicarboxylate (1i)**

White solid; (650 mg, 79% yield); m. p. 91-92 °C; TLC (petroleum ether/EtOAc = 30 : 1):  $R_f = 0.34$ .

$^1\text{H}$  NMR (500 MHz,  $\text{CDCl}_3$ ):  $\delta$  7.56 (d,  $J = 8.0$  Hz, 2H), 7.31-7.26 (m, 4H), 7.14 (d,  $J = 8.0$  Hz, 2H), 6.98 (s, 1H), 5.14 (s, 1H), 4.29-4.22 (m, 4H), 3.86 (d,  $J = 17.2$  Hz, 1H), 3.76-3.66 (m, 3H), 3.56 (d,  $J = 16.5$  Hz, 1H), 3.44 (s, 1H), 3.17-3.10 (m, 1H), 2.73 (q,  $J = 7.6$  Hz, 2H), 2.64 (q,  $J = 7.6$  Hz, 2H), 2.28-2.23 (m, 1H), 2.19-2.14 (m, 2H), 2.11-2.05 (m, 4H), 1.91 (d,  $J = 13.0$  Hz, 1H), 1.71-1.58 (m, 4H), 1.44 (d,  $J = 11.0$  Hz, 1H), 1.33 (s, 1H), 1.30-1.27 (m, 6H), 1.26-1.18 (m, 6H), 1.15 (s, 3H), 1.10 (s, 3H), 0.97 (d,  $J = 3.3$  Hz, 3H), 0.96 (d,  $J = 3.2$  Hz, 3H), 0.63 (t,  $J = 7.1$  Hz, 3H).  $^{13}\text{C}$  NMR (125 MHz,  $\text{CDCl}_3$ ):  $\delta$  177.9, 171.9, 171.6, 144.6, 144.0, 143.3, 143.2, 141.7, 141.2, 140.9, 138.6, 137.6, 131.5, 129.6, 129.0, 128.0, 127.4, 125.4, 121.1, 120.7, 115.5, 95.6, 87.1, 62.1, 62.0, 60.4, 59.9, 47.5, 41.7, 41.1, 40.5, 39.3, 37.6, 36.1, 35.7, 34.5, 29.0, 28.7, 27.9, 26.2, 22.6, 21.3, 20.4, 18.5, 16.7, 15.7, 15.6, 14.2, 13.5. **FT-IR** (KBr):  $\nu$  2960, 2360, 1732, 1653, 1558, 1458, 1381, 1238, 1108, 1067, 860, 831, 666, 476  $\text{cm}^{-1}$ . **HRMS** (APCI):  $m/z$  calcd for  $\text{C}_{55}\text{H}_{66}\text{O}_6$   $[\text{M}+\text{H}]^+$  823.4932, found 823.4937.

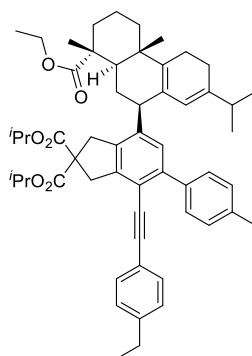

**6c**

**Diisopropyl 7-(1-(ethoxycarbonyl)-7-isopropyl-1,4a-dimethyl-1,2,3,4,4a,5,6,9,10,10a-decahydrophenanthren-9-yl)-5-(4-ethylphenyl)-4-((4-ethylphenyl)ethynyl)-1,3-dihydro-2H-indene-2,2-dicarboxylate (1o)**

White solid; (655 mg, 77% yield); m. p. 90-91 °C; TLC (petroleum ether/EtOAc = 30 : 1):  $R_f$  = 0.45.

$^1\text{H NMR}$  (500 MHz,  $\text{CDCl}_3$ ):  $\delta$  7.56 (d,  $J$  = 8.0 Hz, 2H), 7.31-7.27 (m, 4H), 7.14 (d,  $J$  = 8.0 Hz, 2H), 6.97 (s, 1H), 5.13 (s, 1H), 5.12-5.06 (m, 2H), 3.81 (d,  $J$  = 17.2 Hz, 1H), 3.74-3.62 (m, 3H), 3.53 (d,  $J$  = 16.6 Hz, 1H), 3.45 (d,  $J$  = 5.4 Hz, 1H), 3.20-3.13 (m, 1H), 2.73 (q,  $J$  = 7.6 Hz, 2H), 2.64 (q,  $J$  = 7.6 Hz, 2H), 2.29-2.21 (m, 1H), 2.21-2.09 (m, 4H), 2.08-2.04 (m, 2H), 1.90 (d,  $J$  = 12.8 Hz, 1H), 1.73-1.64 (m, 2H), 1.64-1.55 (m, 2H), 1.46-1.42 (m, 1H), 1.33 (s, 1H), 1.32-1.26 (m, 12H), 1.25-1.21 (m, 6H), 1.15 (s, 3H), 1.10 (s, 3H), 0.97 (d,  $J$  = 3.3 Hz, 3H), 0.96 (d,  $J$  = 3.2 Hz, 3H), 0.62 (t,  $J$  = 7.1 Hz, 3H).  $^{13}\text{C NMR}$  (125 MHz,  $\text{CDCl}_3$ ):  $\delta$  177.9, 171.4, 171.1, 144.5, 143.9, 143.4, 143.1, 141.7, 141.2, 140.9, 138.6, 137.7, 131.5, 129.6, 128.9, 127.9, 127.4, 125.4, 121.2, 120.7, 115.5, 95.5, 87.2, 69.4, 69.3, 60.4, 59.9, 47.5, 41.6, 40.9, 40.5, 39.2, 37.6, 36.2, 35.7, 34.5, 29.0, 28.7, 28.0, 26.2, 22.6, 21.7, 21.7, 21.3, 20.5, 18.5, 16.7, 15.7, 15.6, 13.5. **FT-R** (KBr):  $\nu$  2960, 2341, 1724, 1655, 1558, 1456, 1372, 1246, 1106, 1062, 832, 668, 474, 418  $\text{cm}^{-1}$ . **HRMS** (APCI):  $m/z$  calcd for  $\text{C}_{57}\text{H}_{70}\text{O}_6$   $[\text{M}+\text{H}]^+$  851.5245, found 851.5241.

### 3. X-ray crystallographic data of 3h.

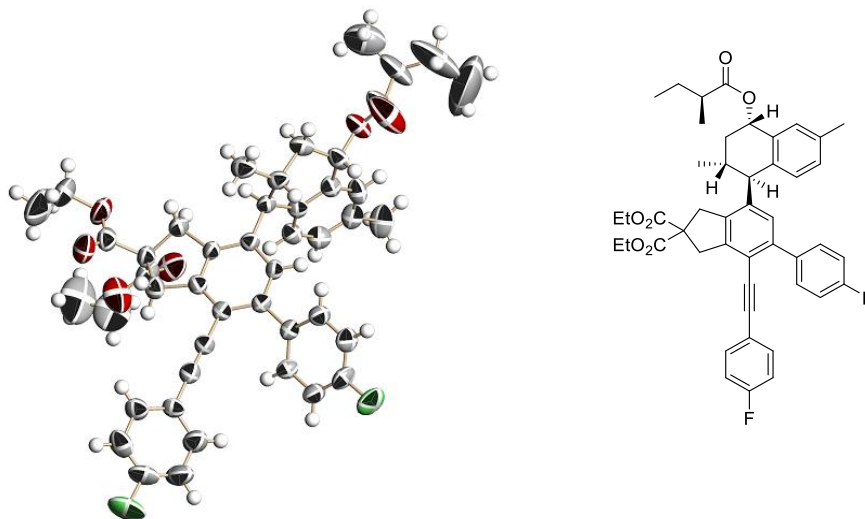

**Figure S1.** Molecular structure of **3h** (CCDC 2342007) showing thermal ellipsoid at the 30% probability level





96-well plate, and the cells with the samples were incubated at 37 °C for 24 h. Next, the working solutions were then removed, and the cells were washed three times with PBS buffer cautiously (RPMI-8226 are suspended cells and this step was not performed). After that, 200 µL fresh medium and 20 µL CCK-8 (Cell Counting Kit-8, MCE) were added into each well successively, and the cells were further incubated at 37 °C for 2 h in a 5% CO<sub>2</sub> humidified atmosphere. The plate was shaken for 5 min, and the absorbance was measured at 450 nm using a microplate reader (Biotek).

## **5. <sup>1</sup>H and <sup>13</sup>C spectra for new compounds**

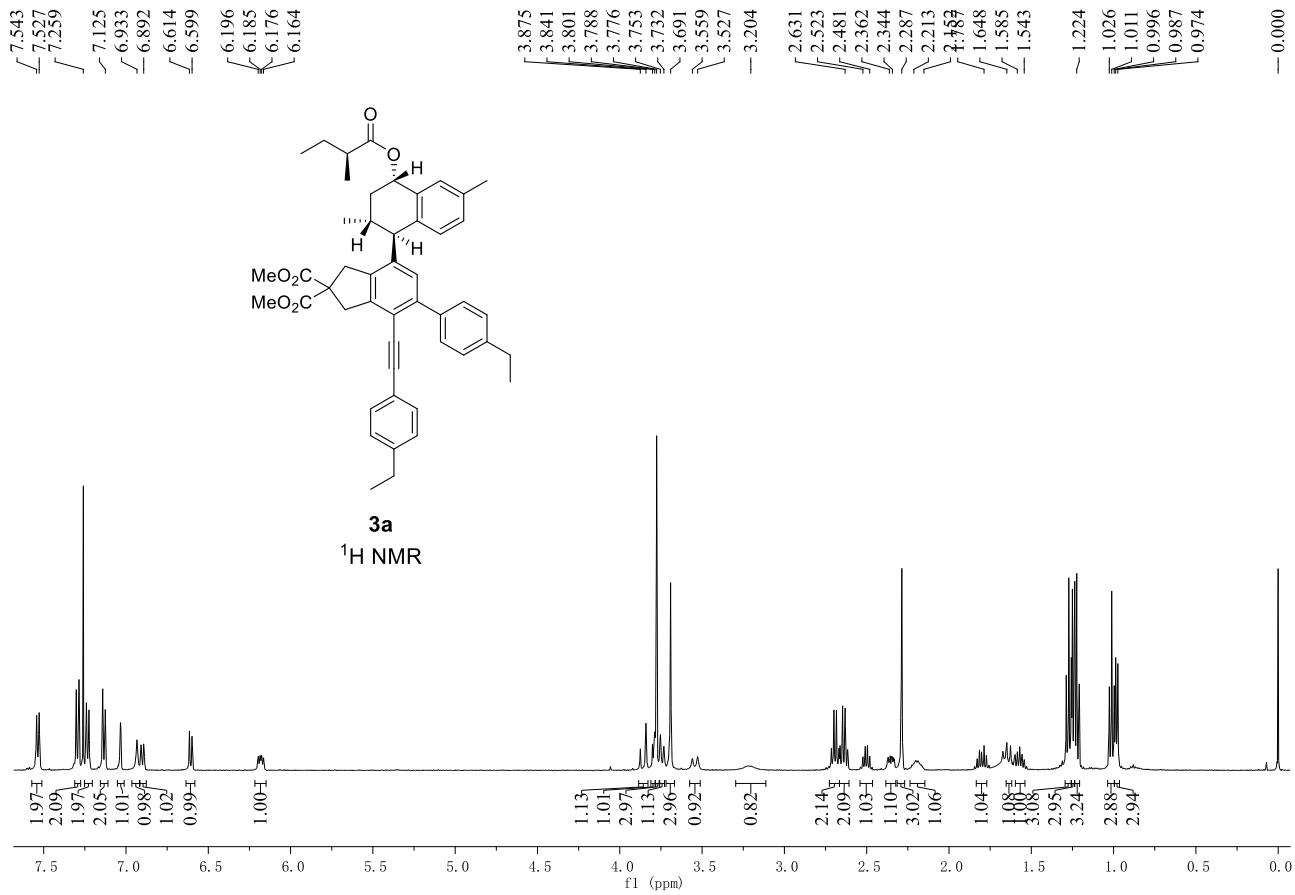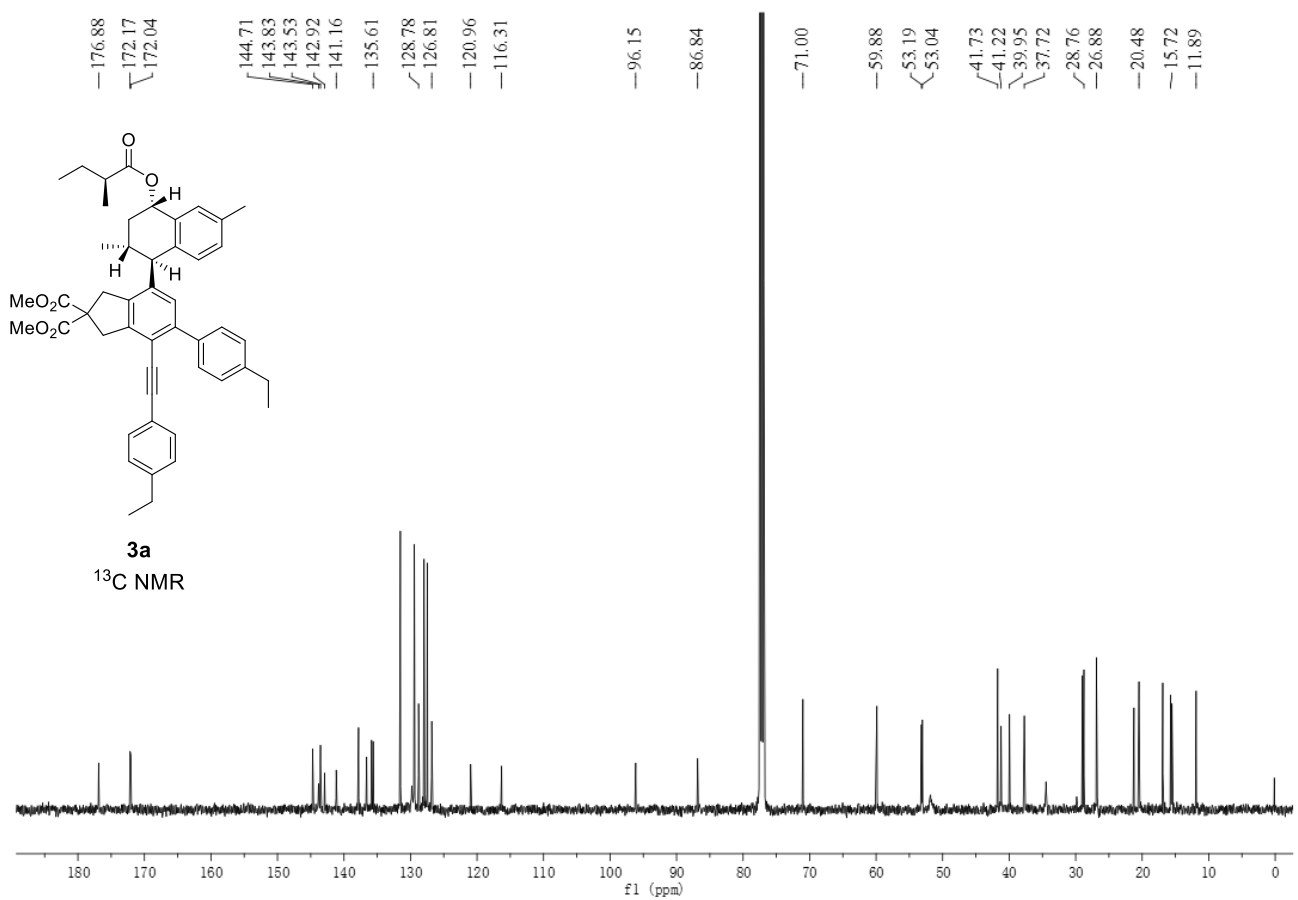

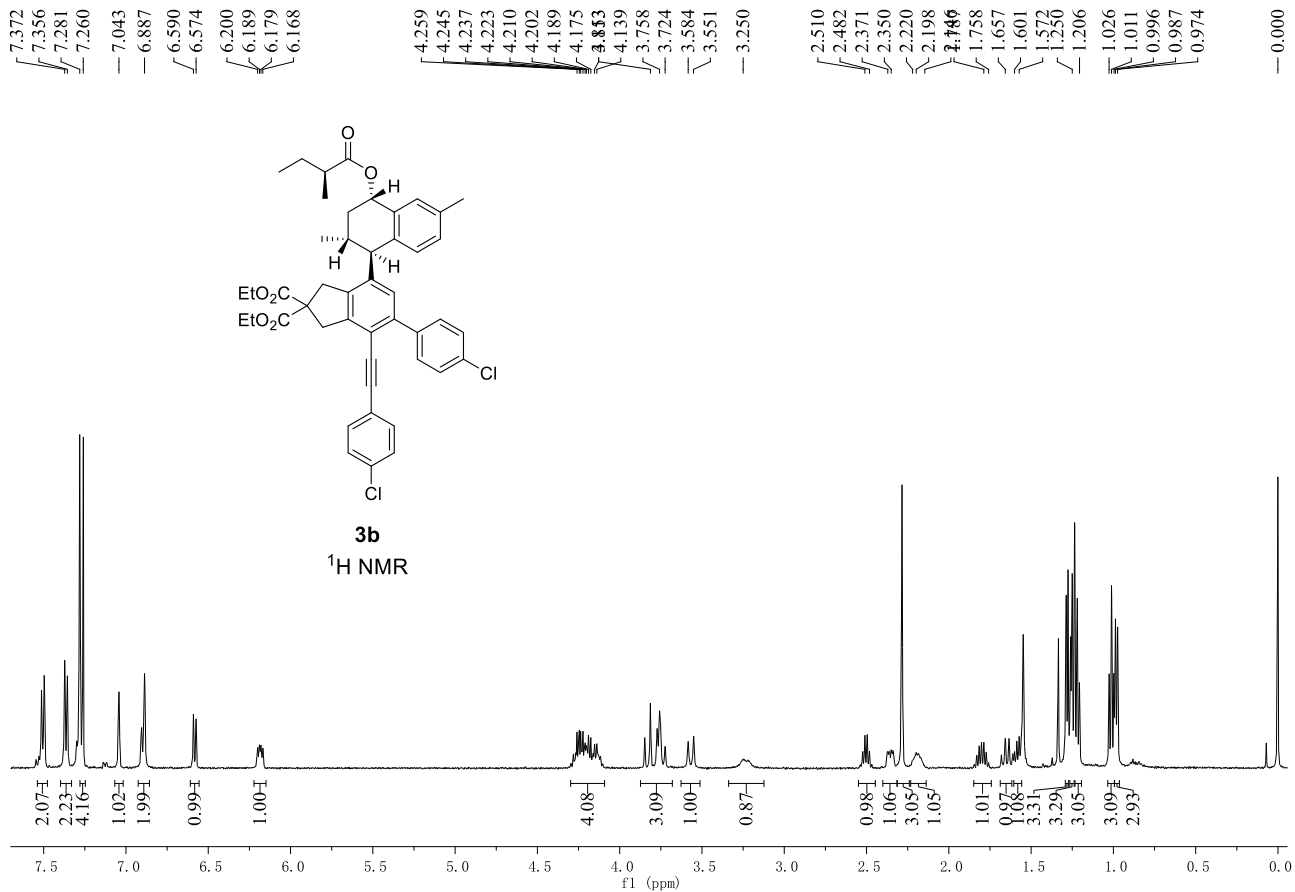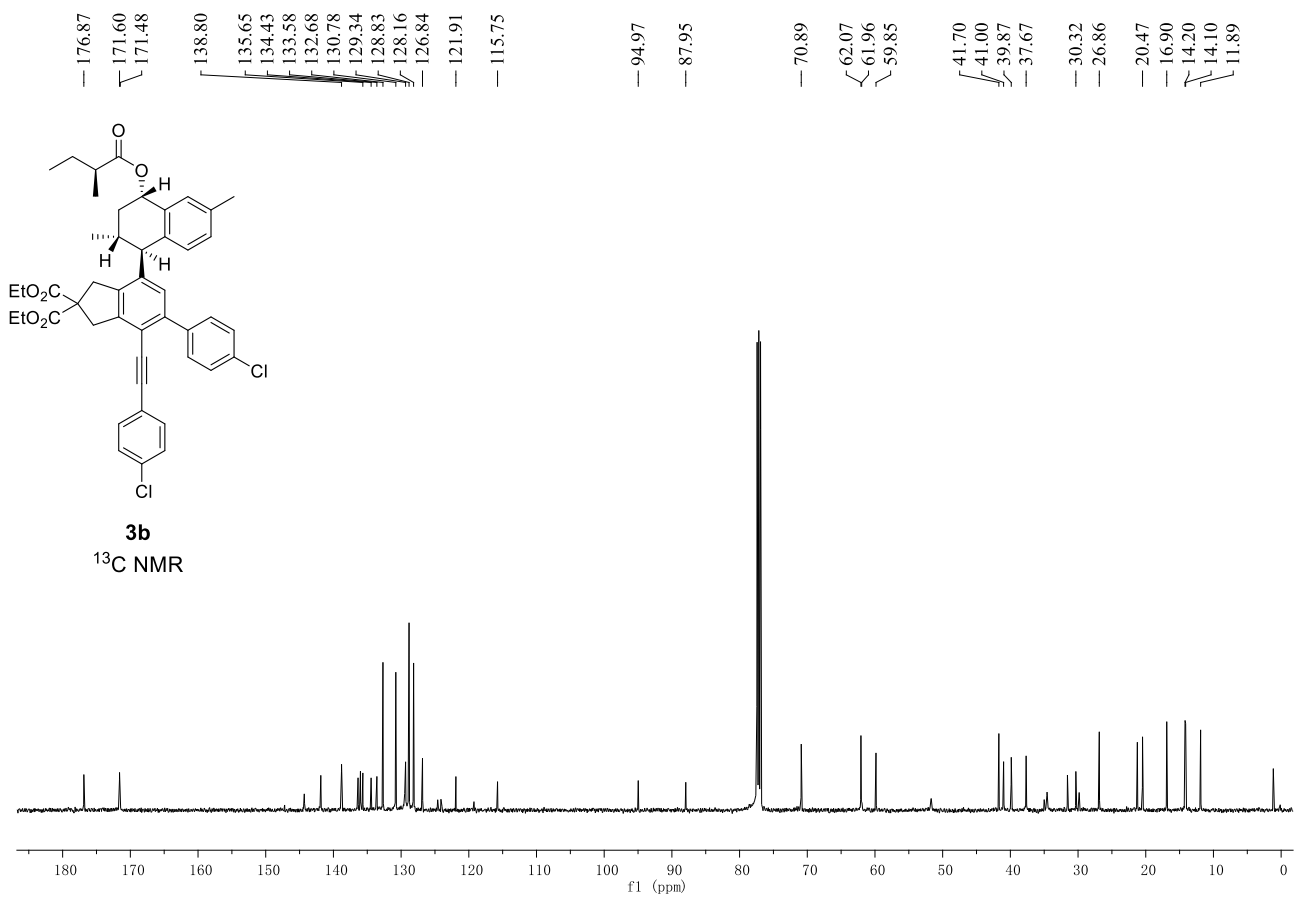

7.536  
7.520  
7.258  
7.122  
6.916  
6.883  
6.604  
6.197  
6.186  
6.177  
6.165  
4.268  
4.254  
4.240  
4.226  
4.212  
4.198  
4.185  
4.152  
4.116  
3.739  
3.575  
3.543  
3.241  
2.645  
2.506  
2.479  
2.356  
2.343  
2.278  
2.219  
2.184  
1.650  
1.583  
1.555  
1.224  
1.025  
1.010  
0.995  
0.989  
0.976

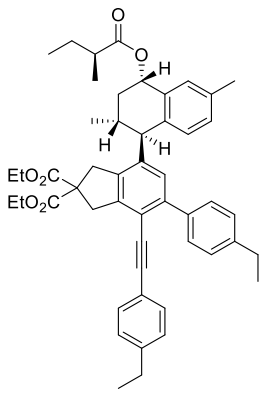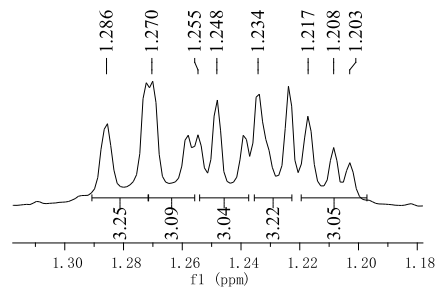

**3c**  
<sup>1</sup>H NMR

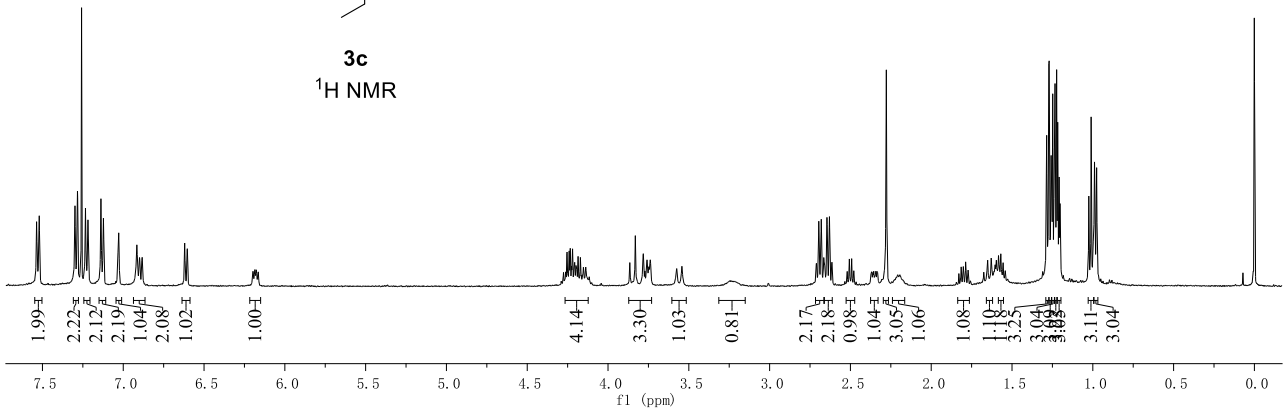

176.85  
171.77  
171.65  
143.48  
141.15  
137.98  
137.87  
136.65  
135.84  
135.60  
131.52  
126.78  
121.03  
116.27  
96.06  
86.90  
71.01  
61.97  
61.85  
59.89  
41.73  
41.13  
39.92  
37.73  
28.75  
26.88  
20.51  
16.90  
15.72  
15.52  
14.21  
14.12  
11.88

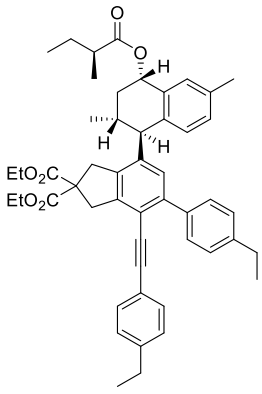

**3c**  
<sup>13</sup>C NMR

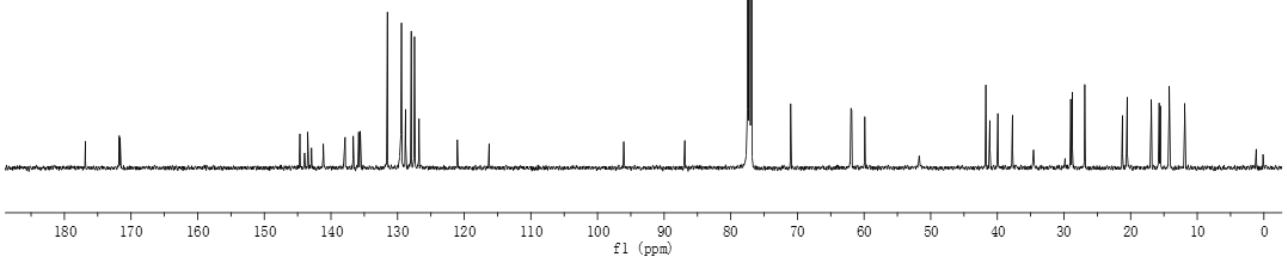

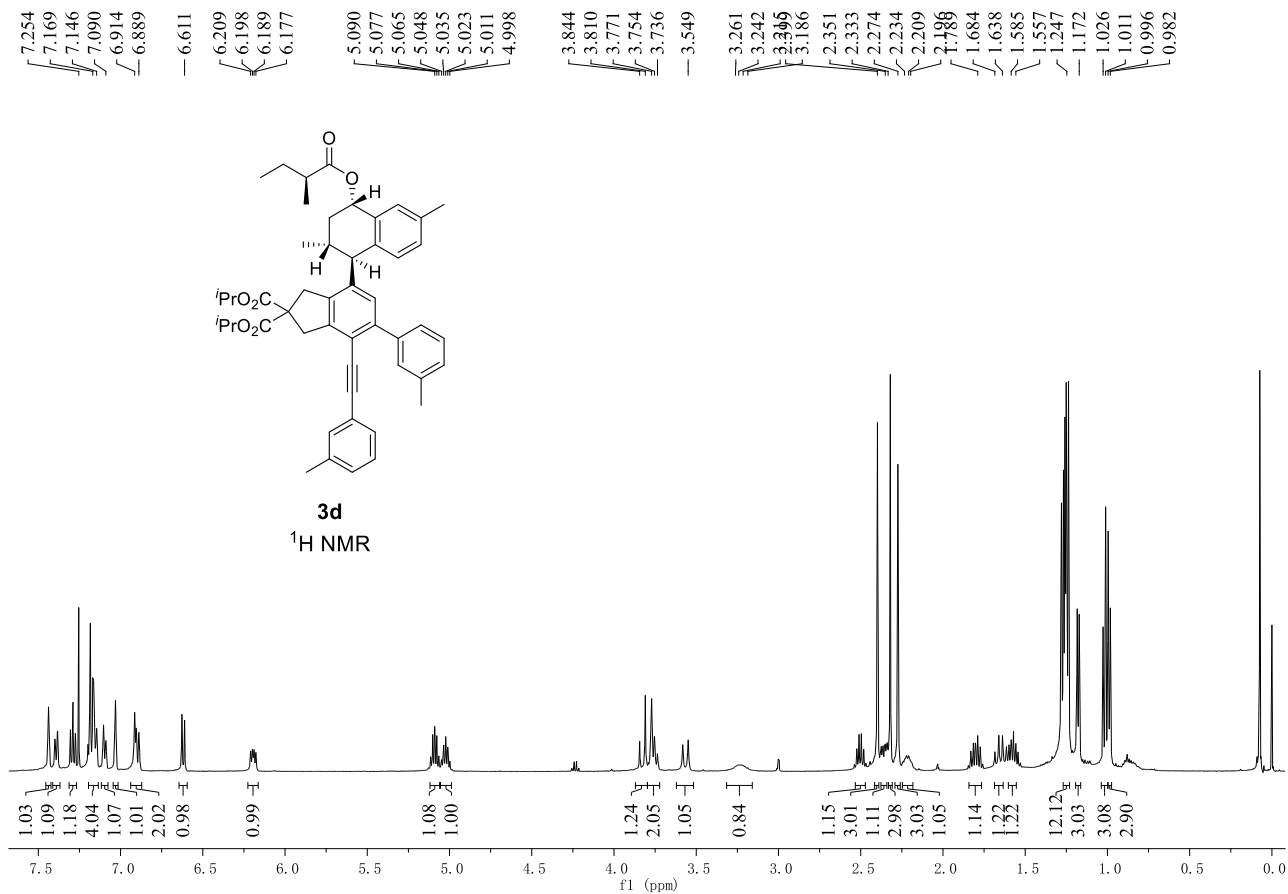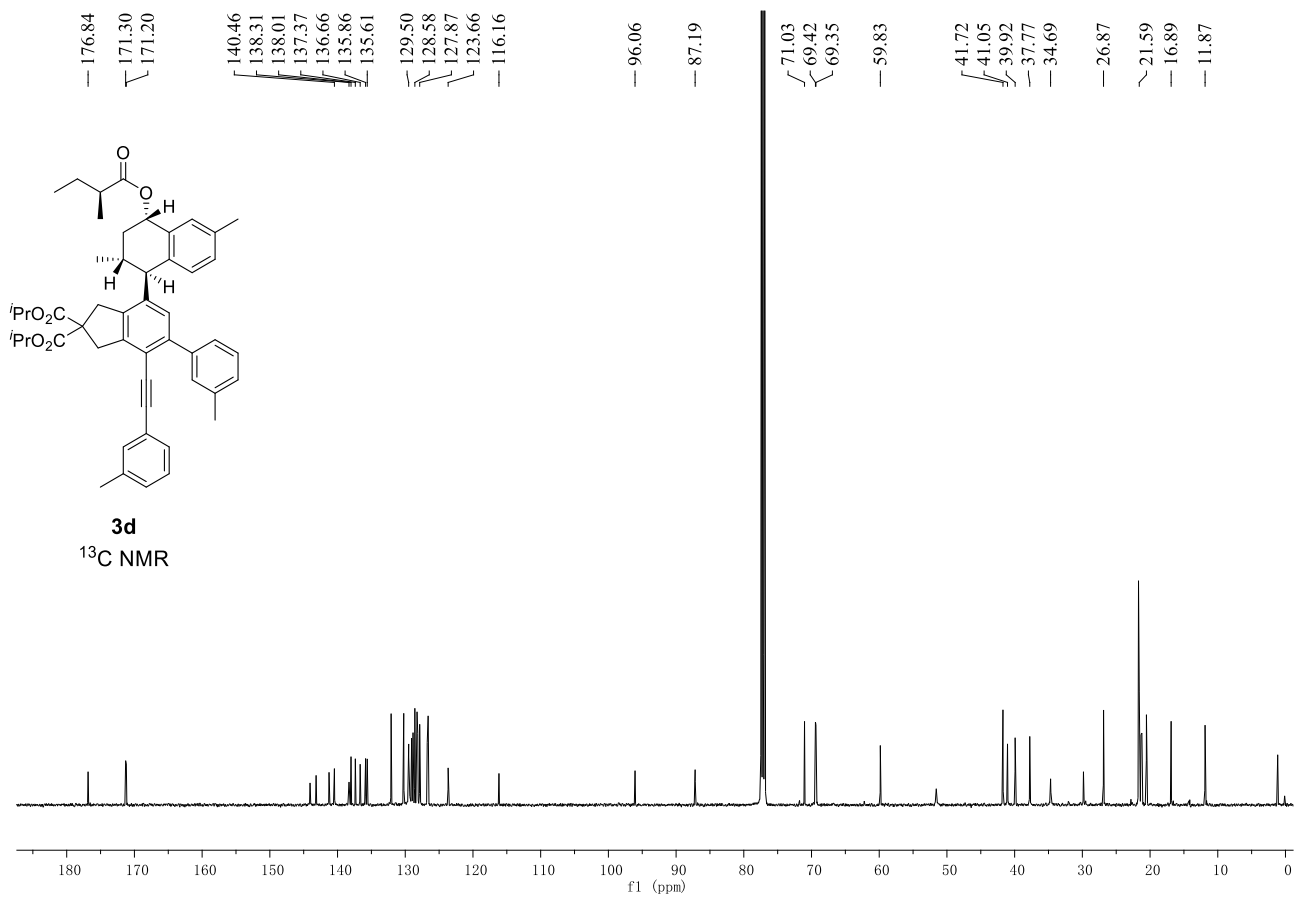

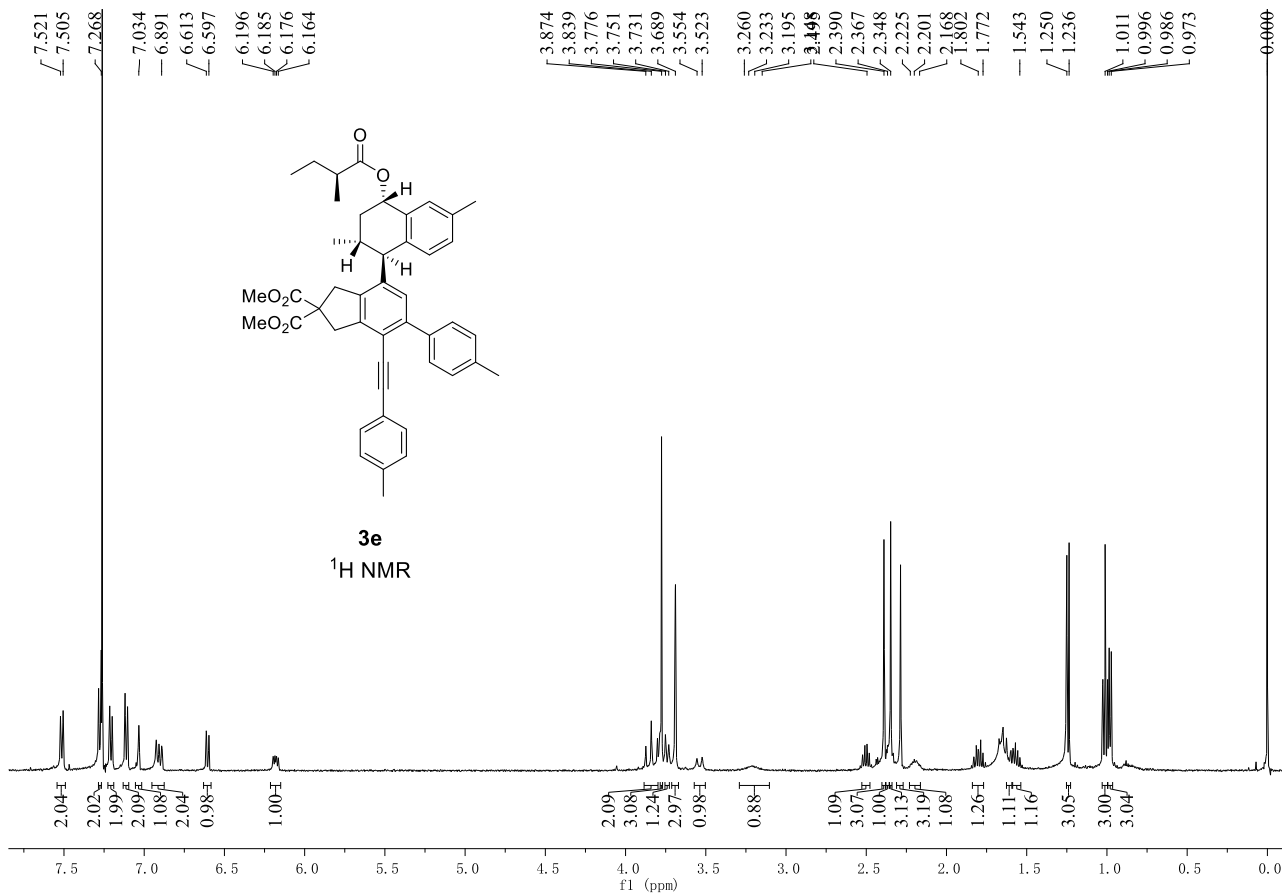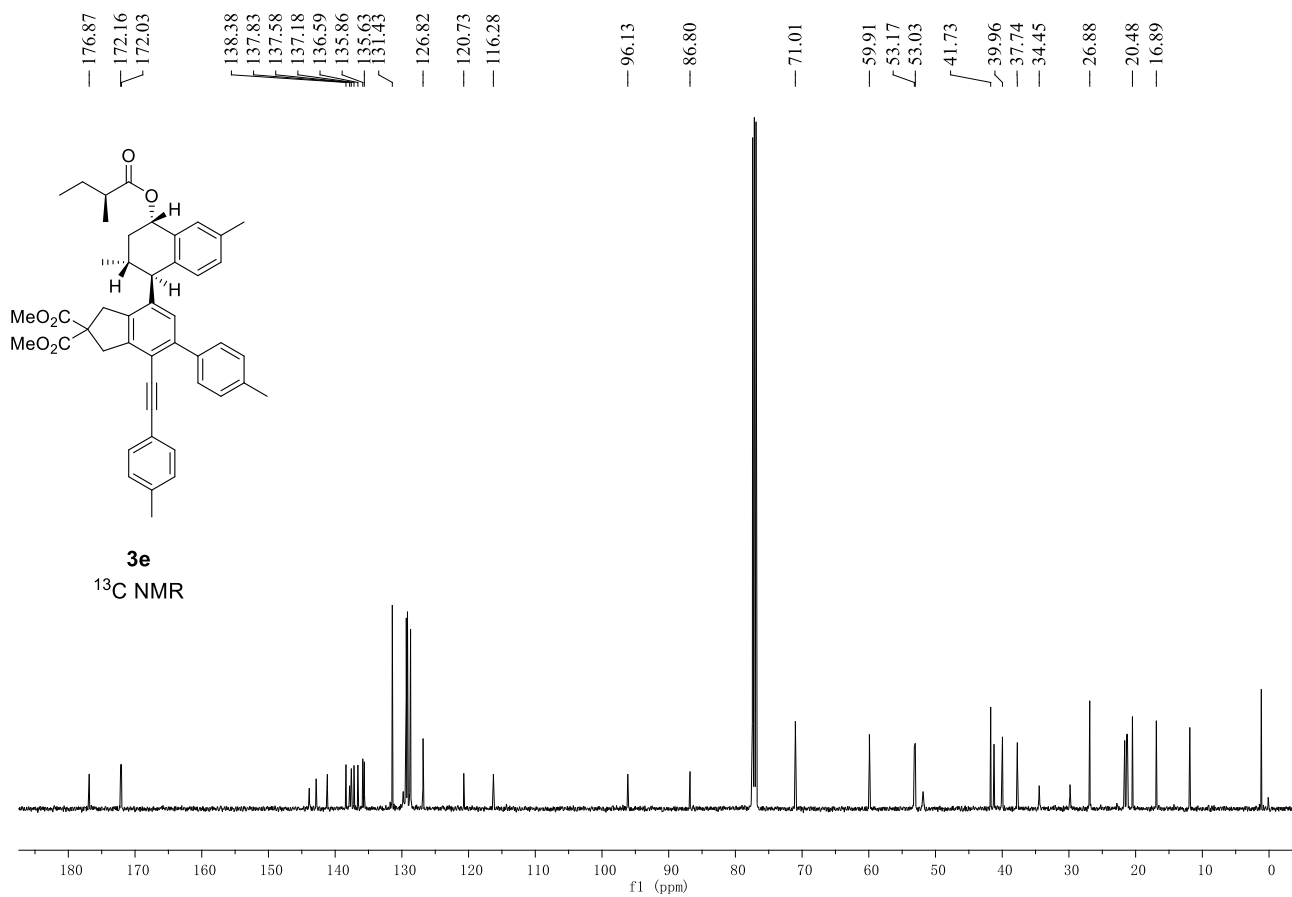

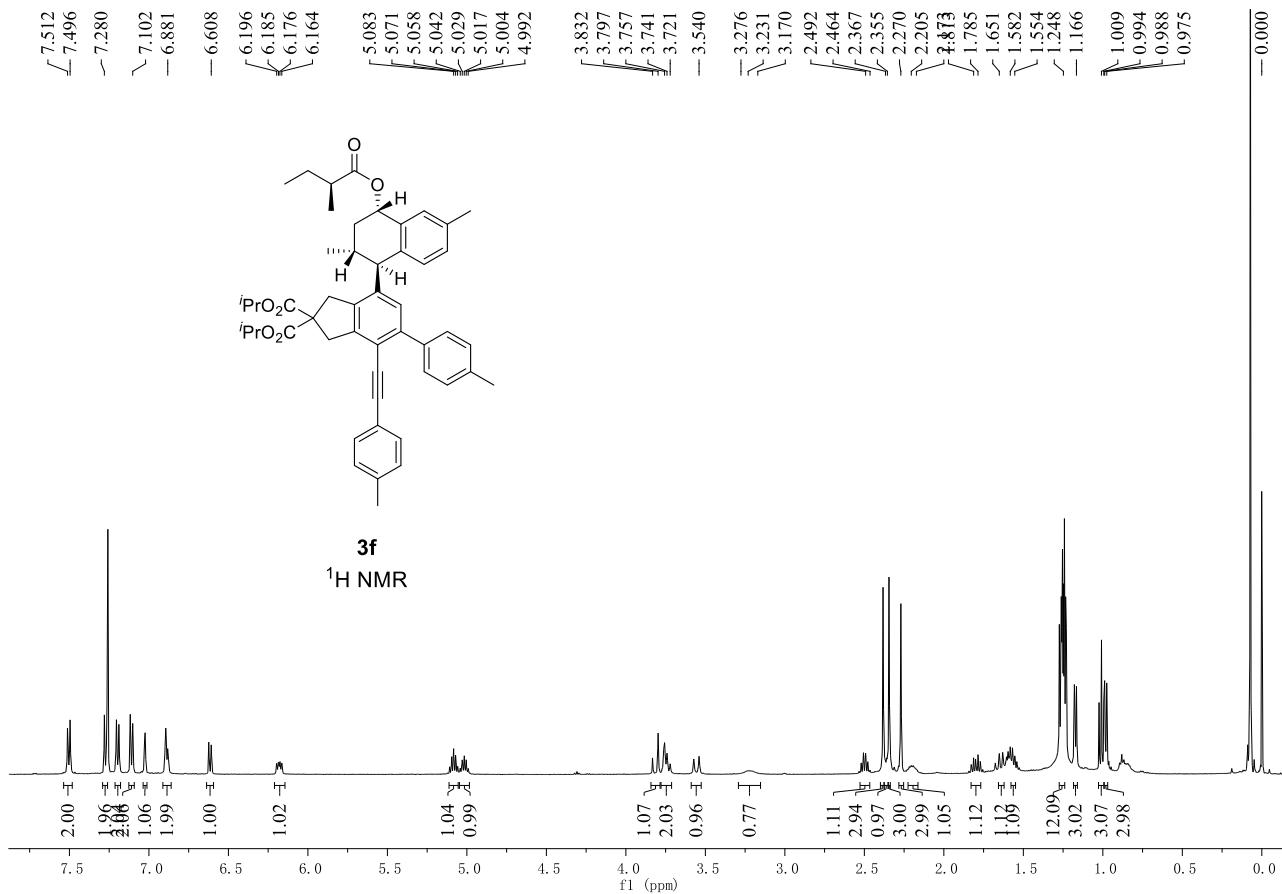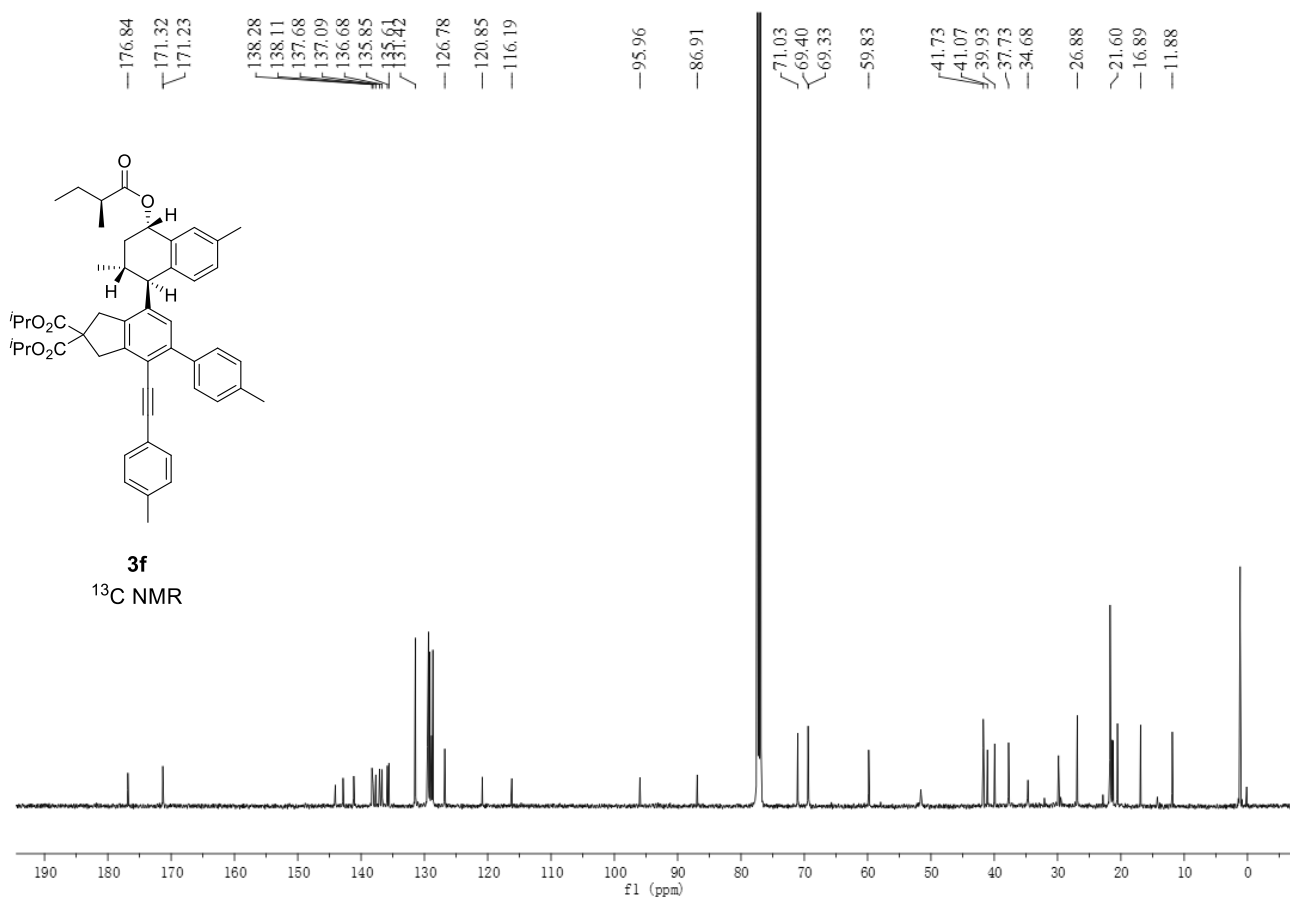



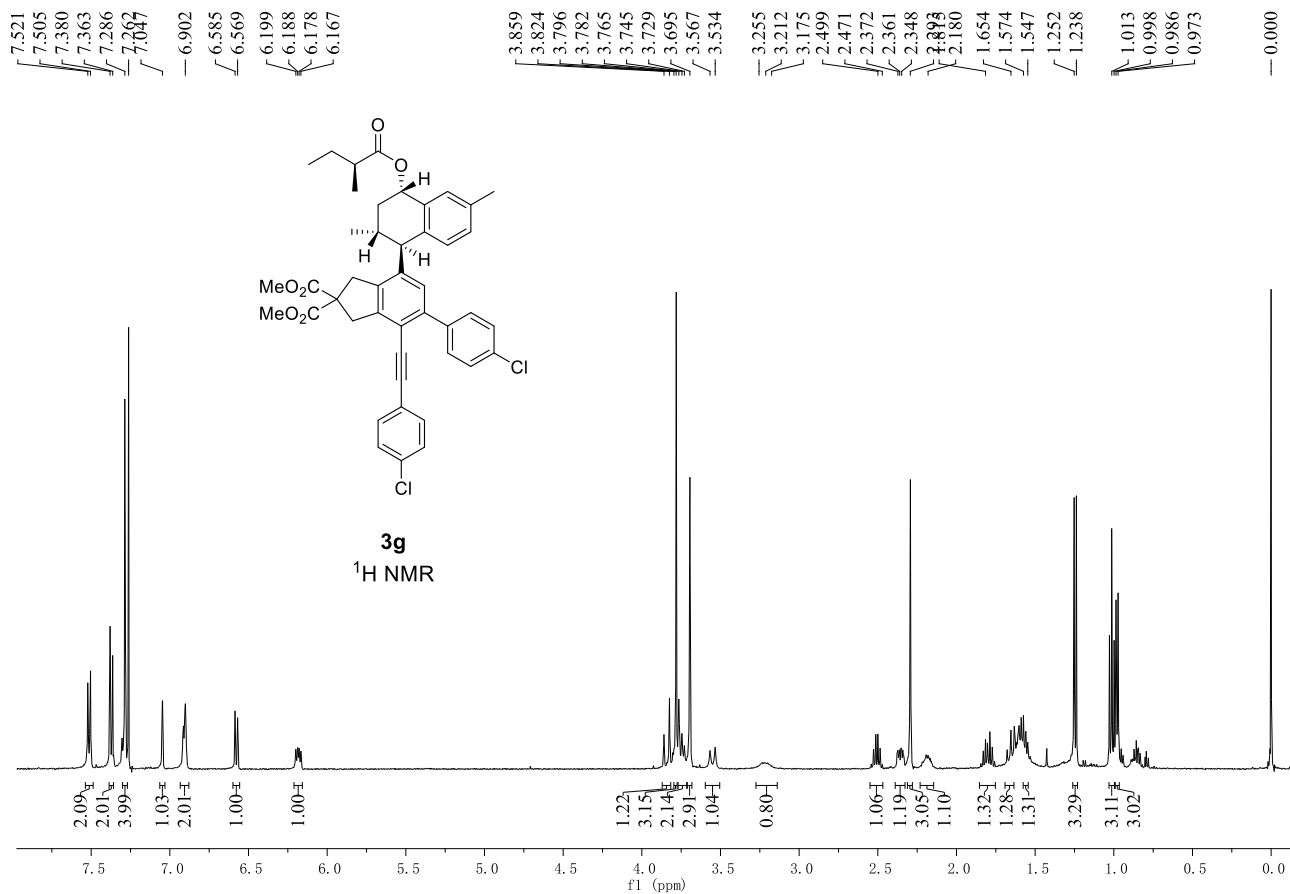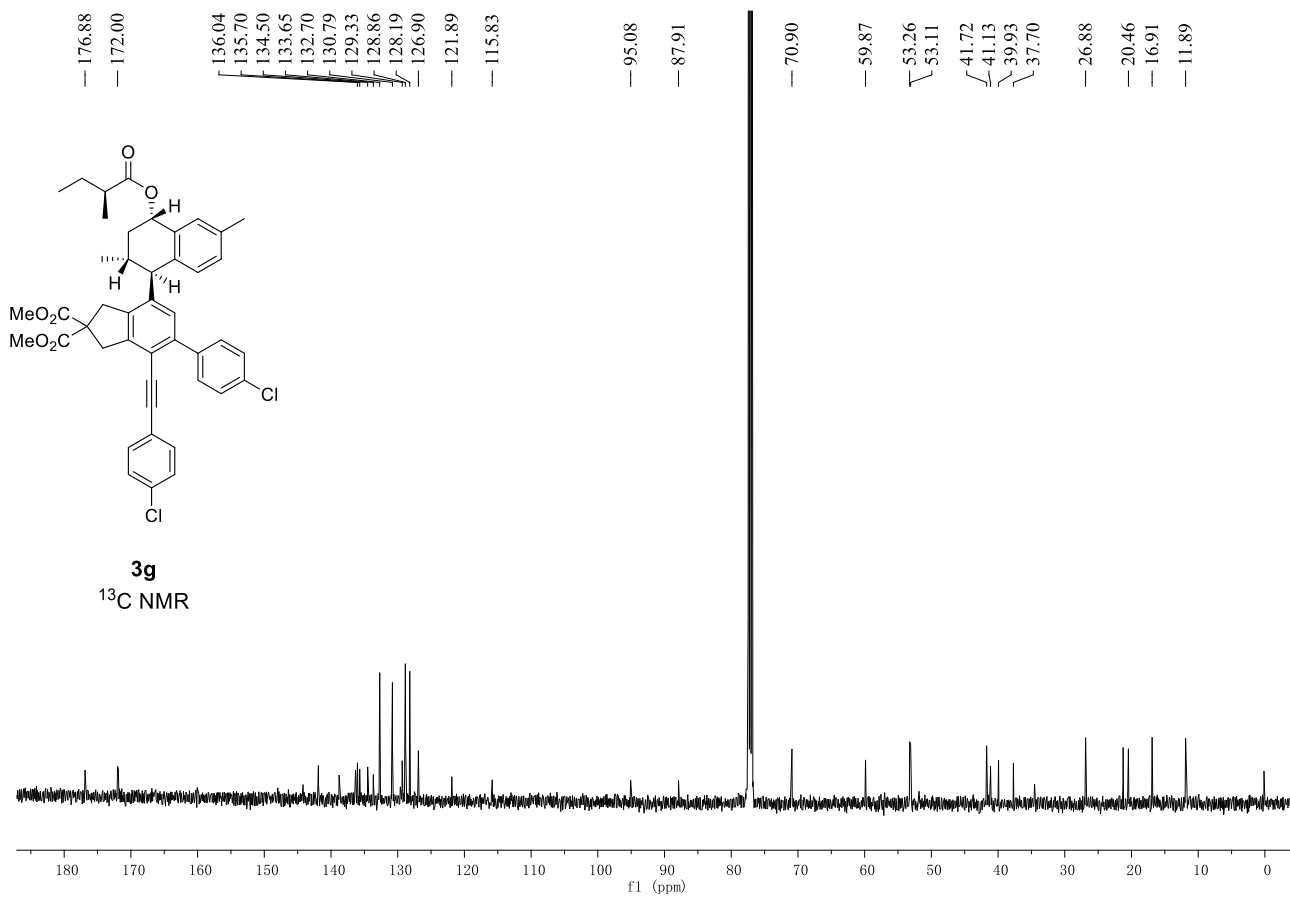

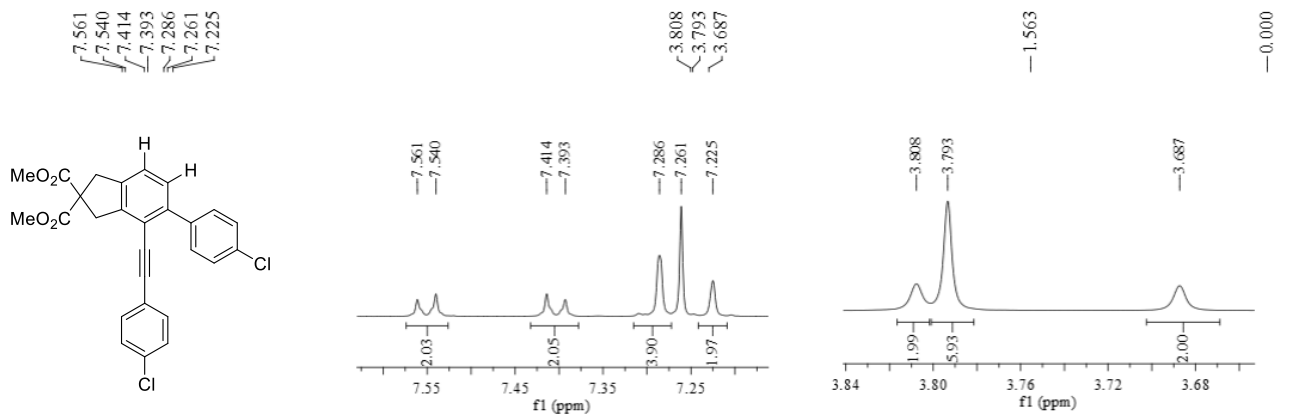

**3g'**  
<sup>1</sup>H NMR

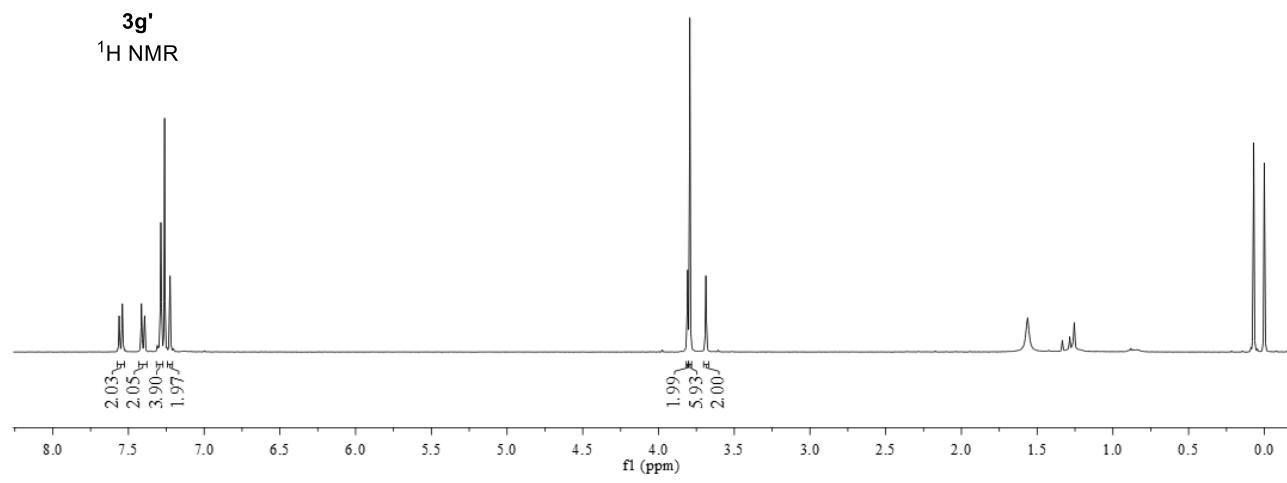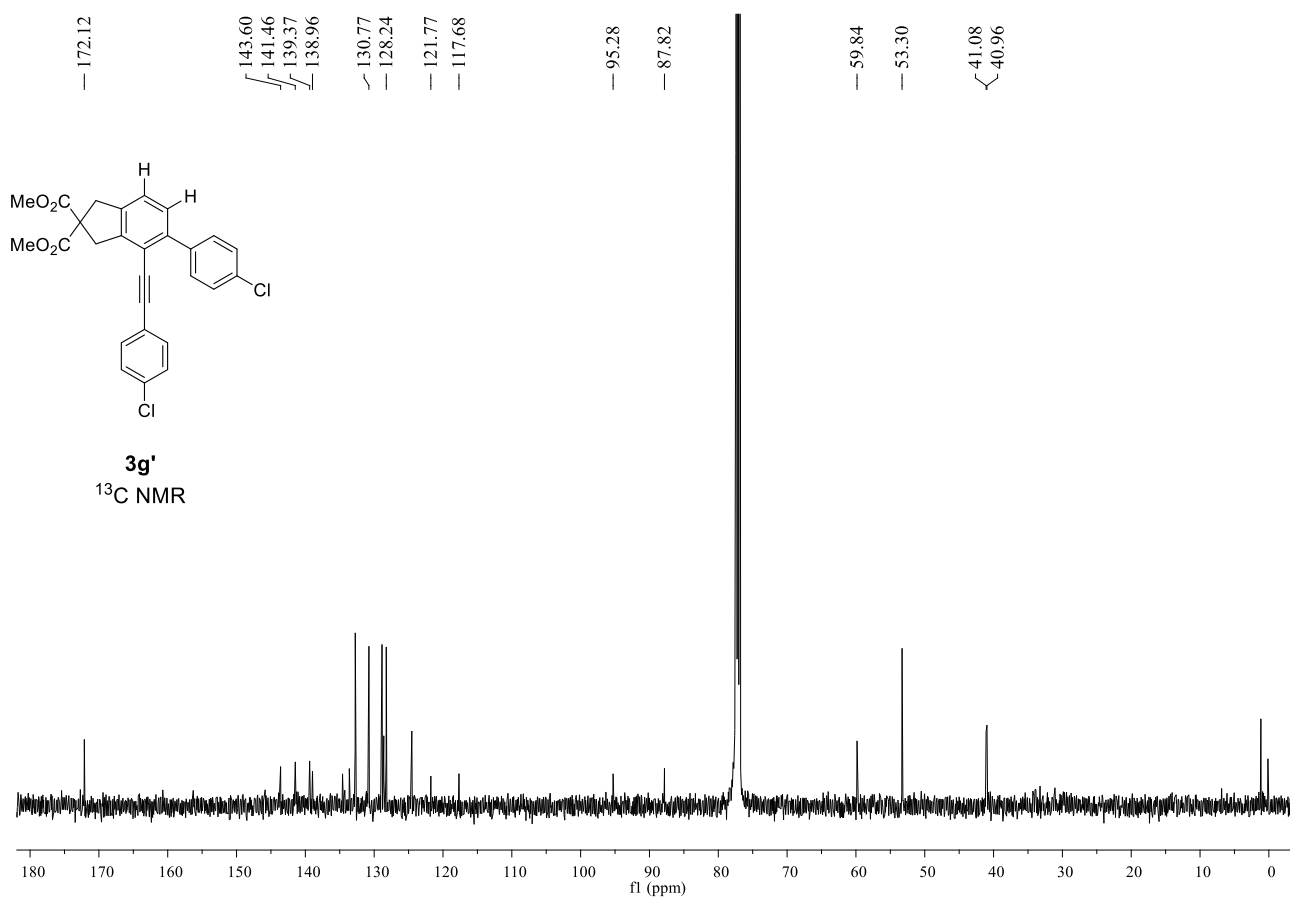

**3g'**  
<sup>13</sup>C NMR

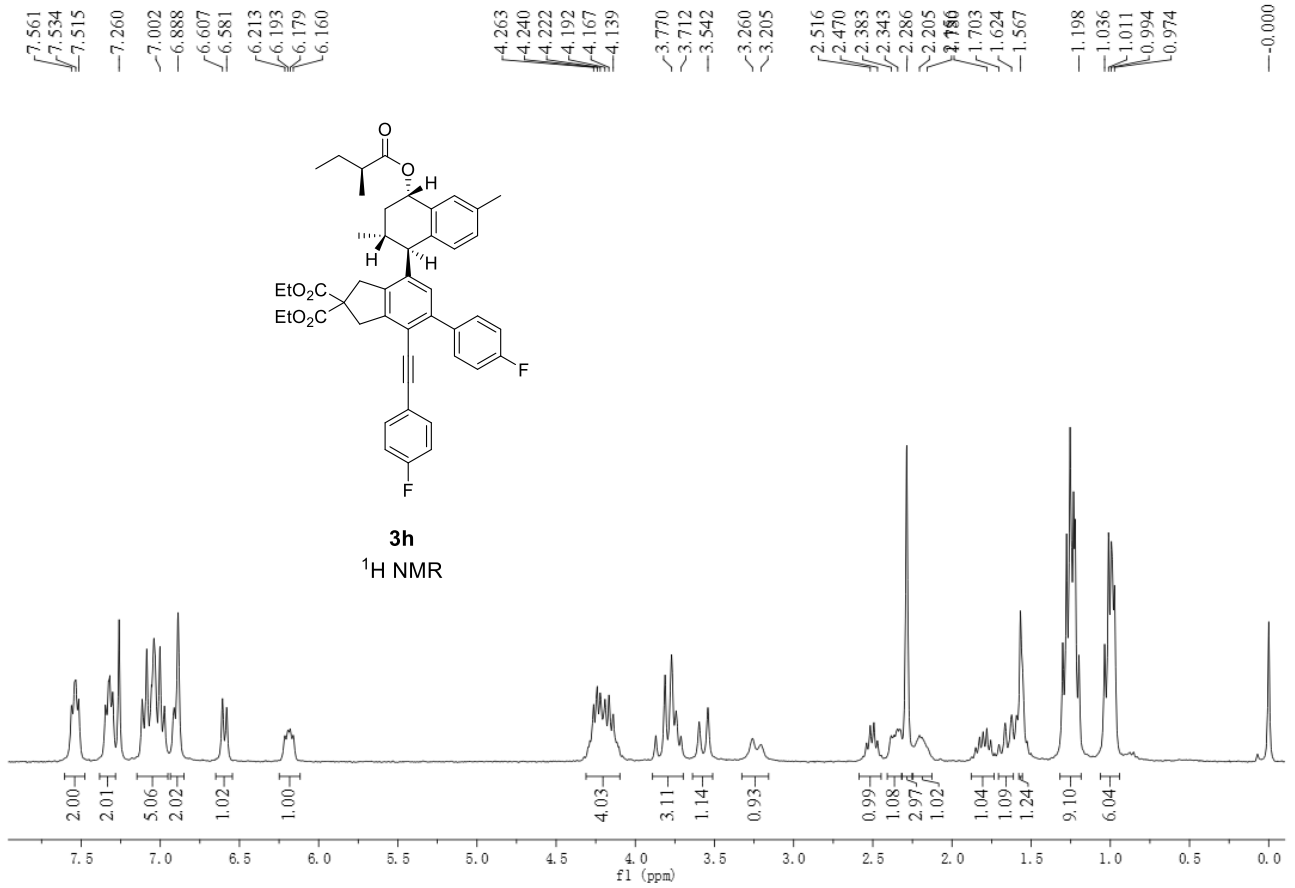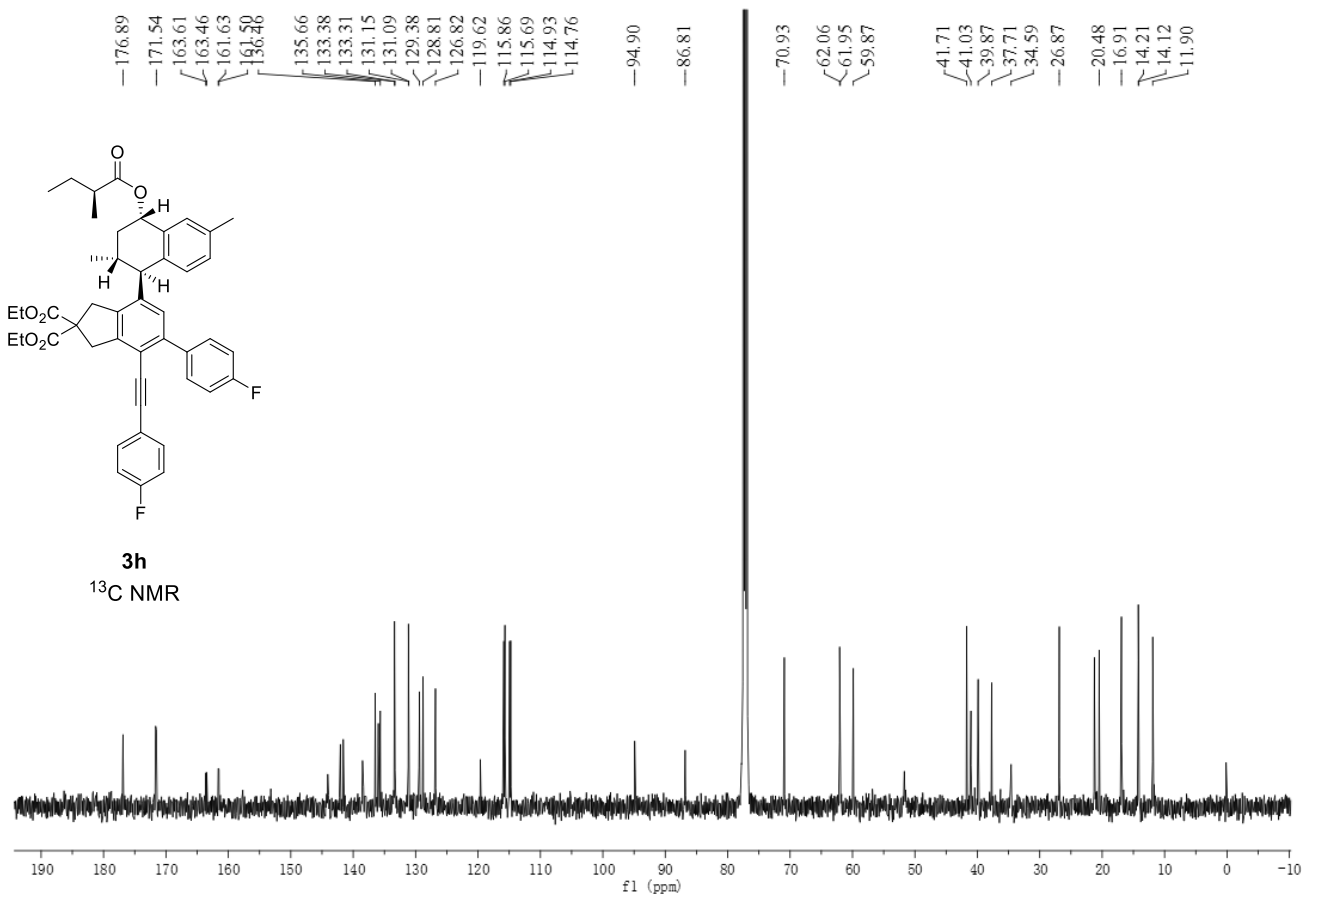

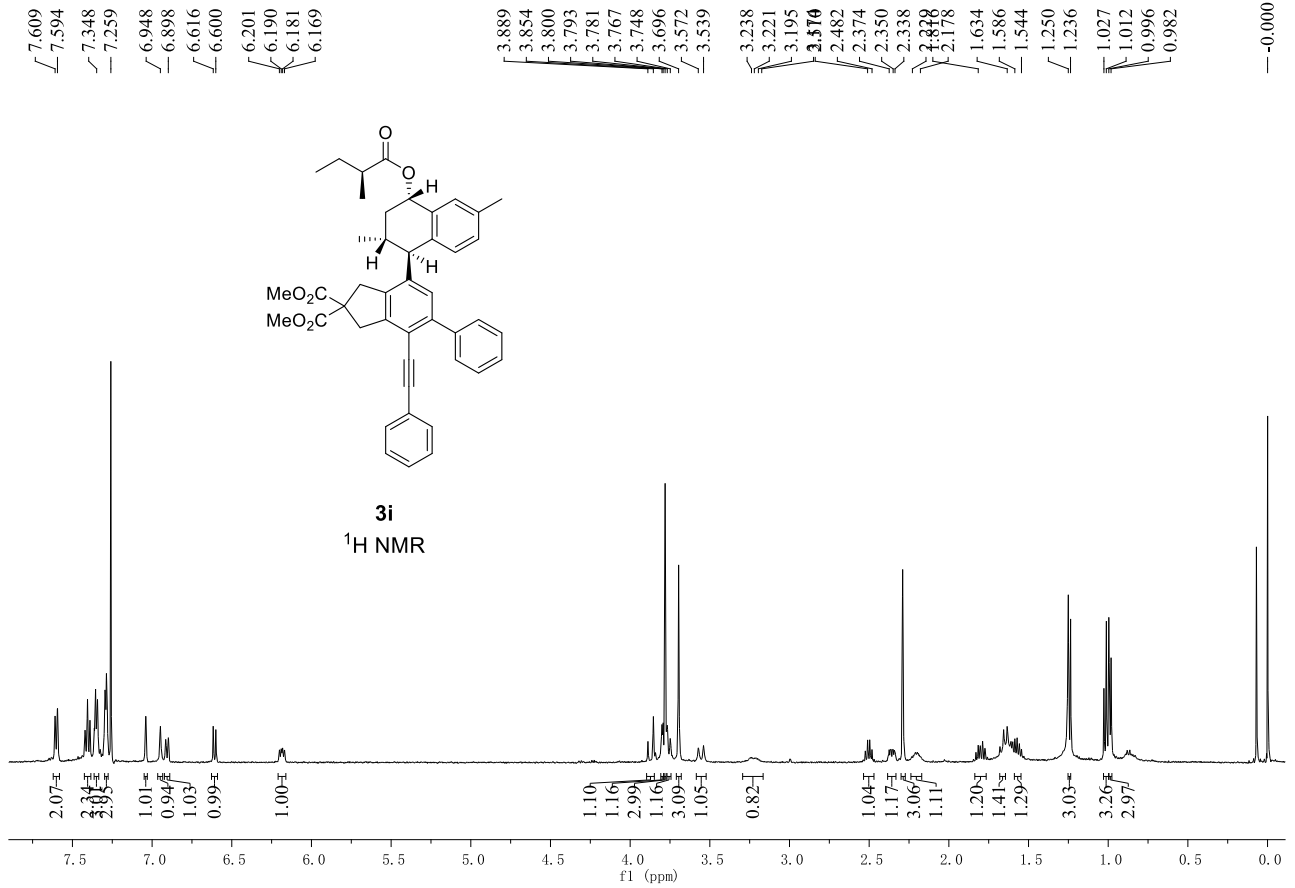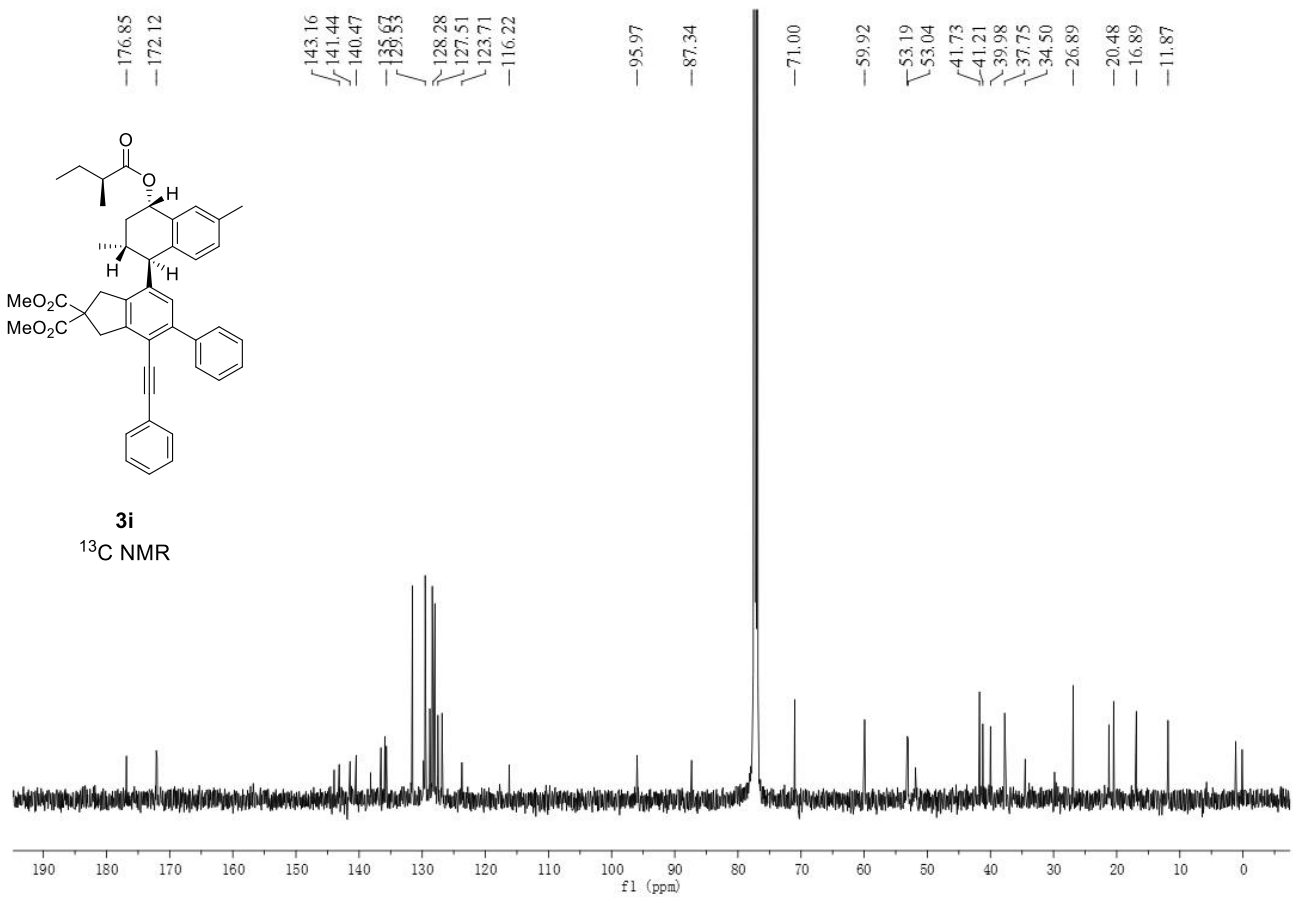

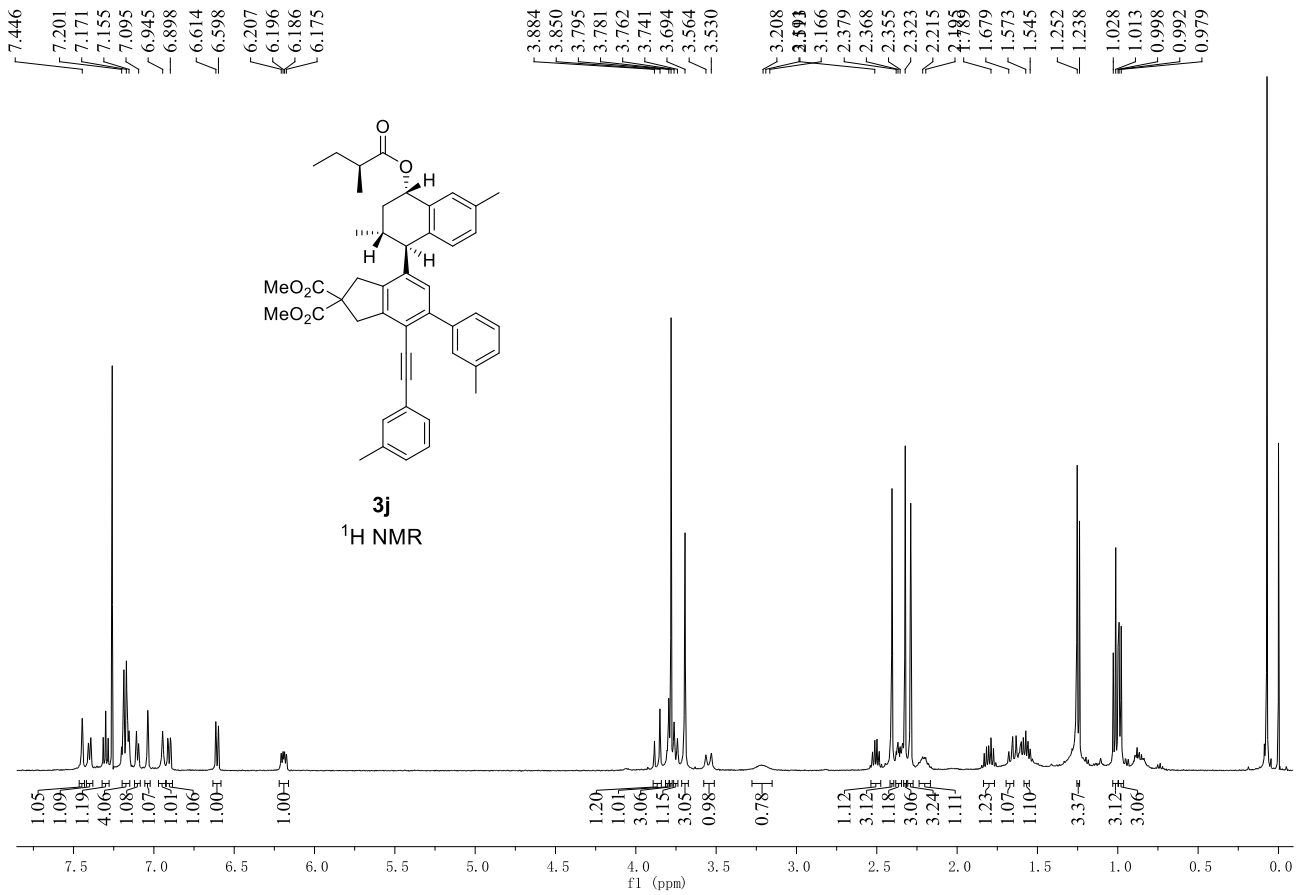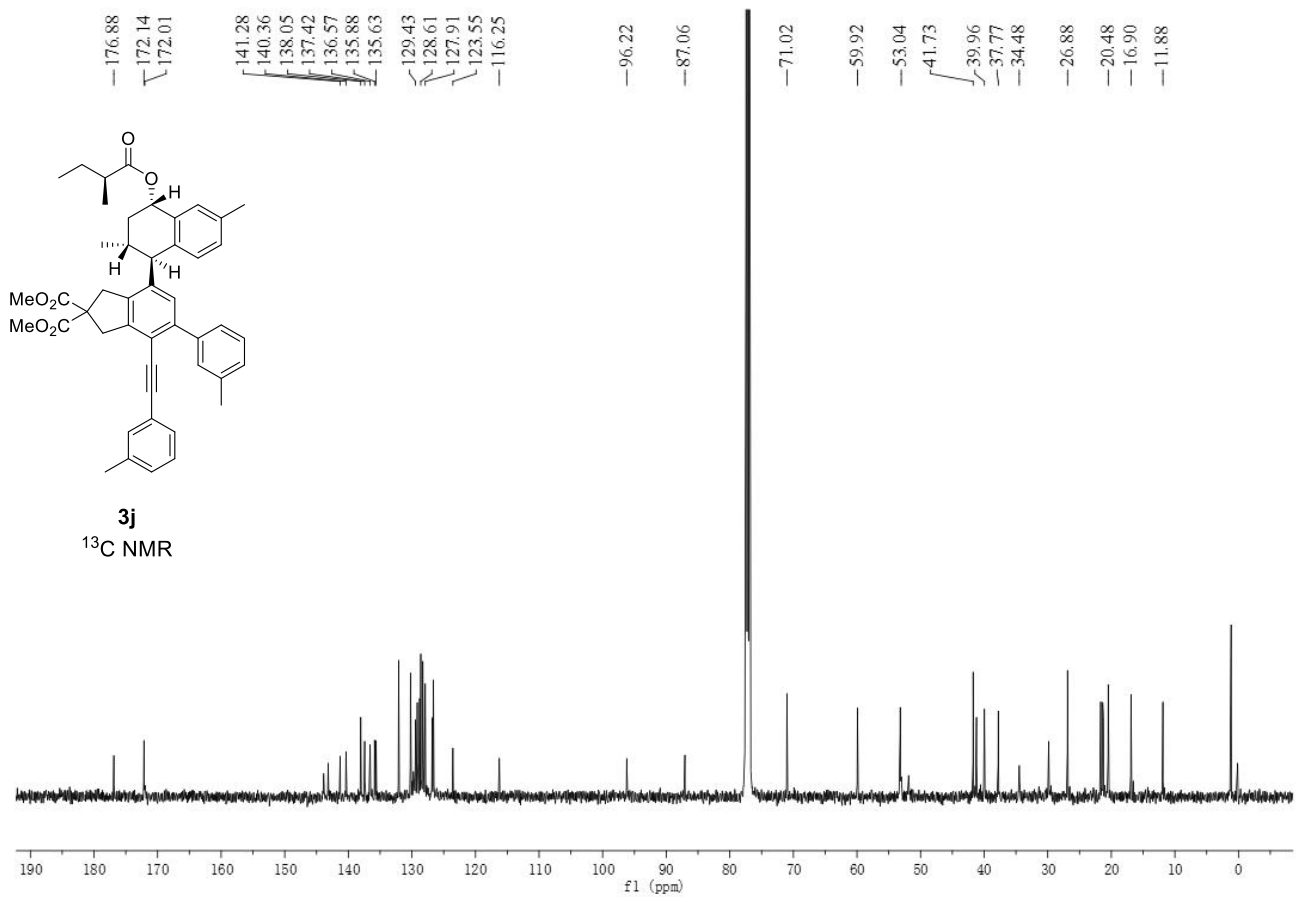

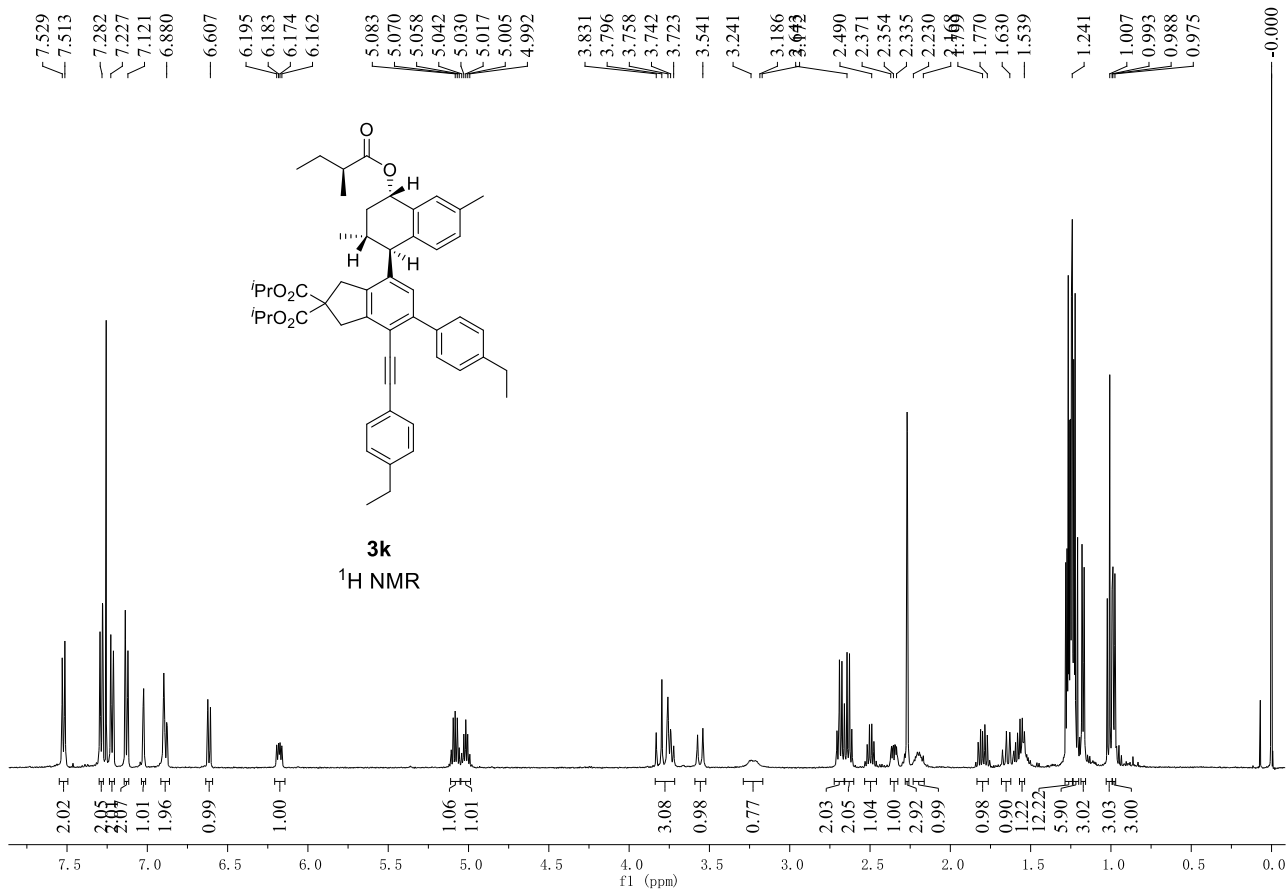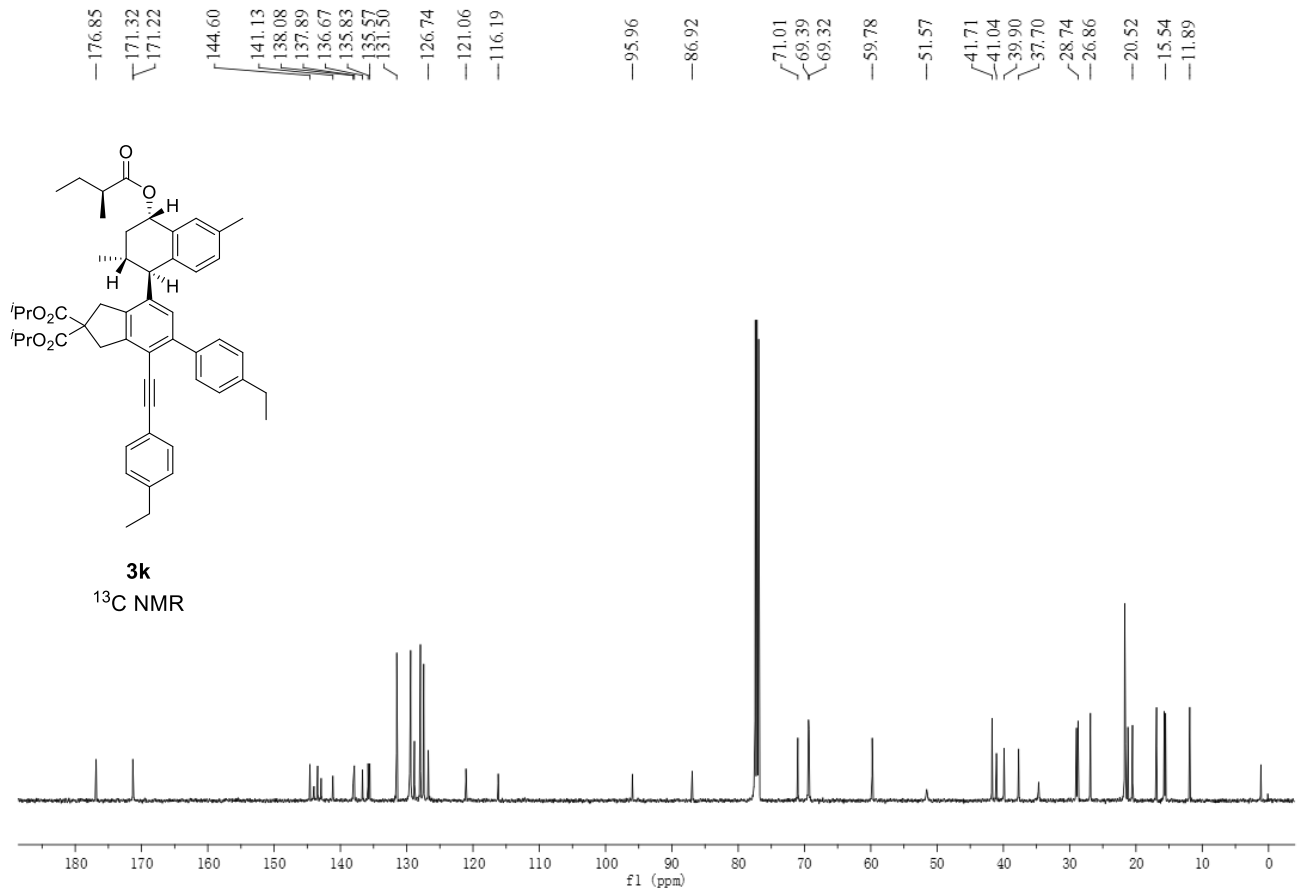

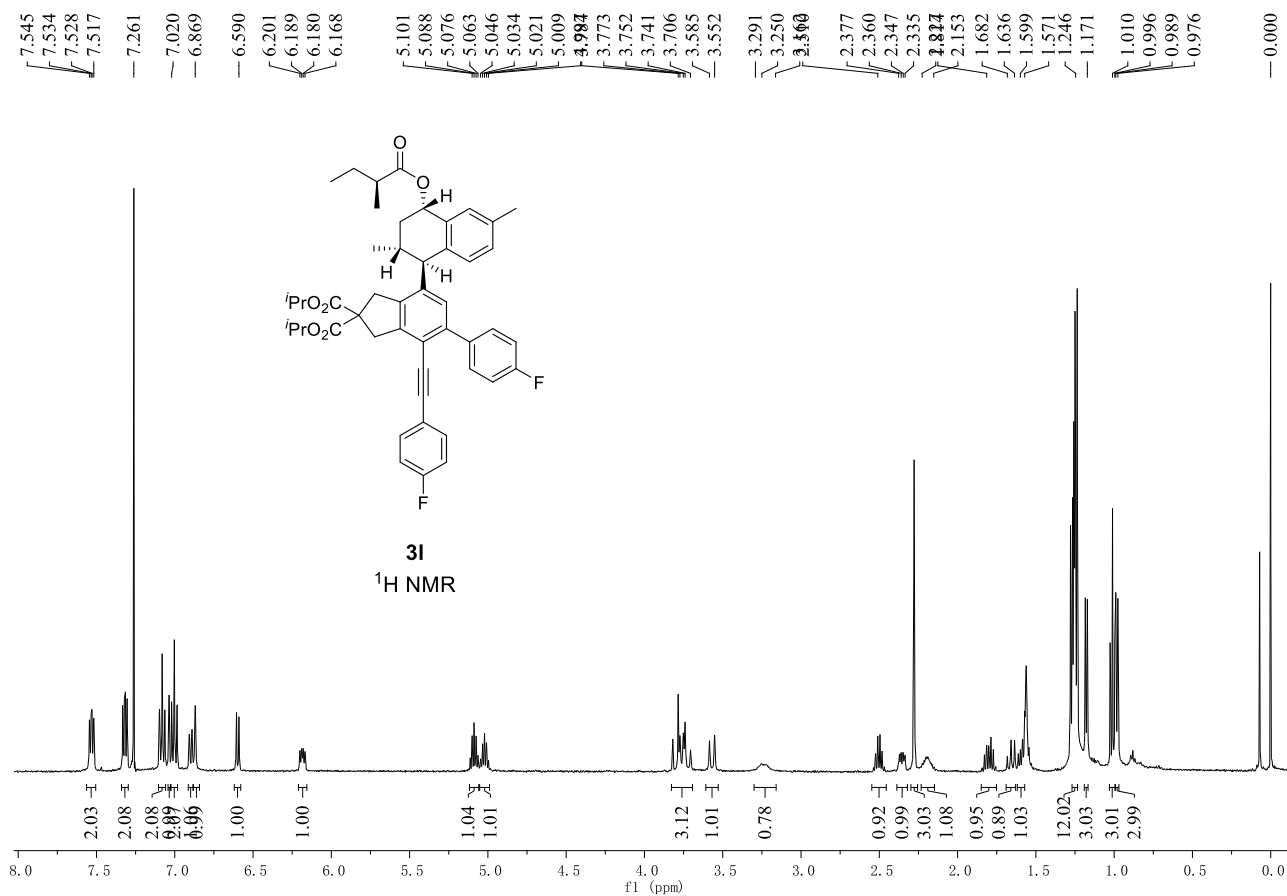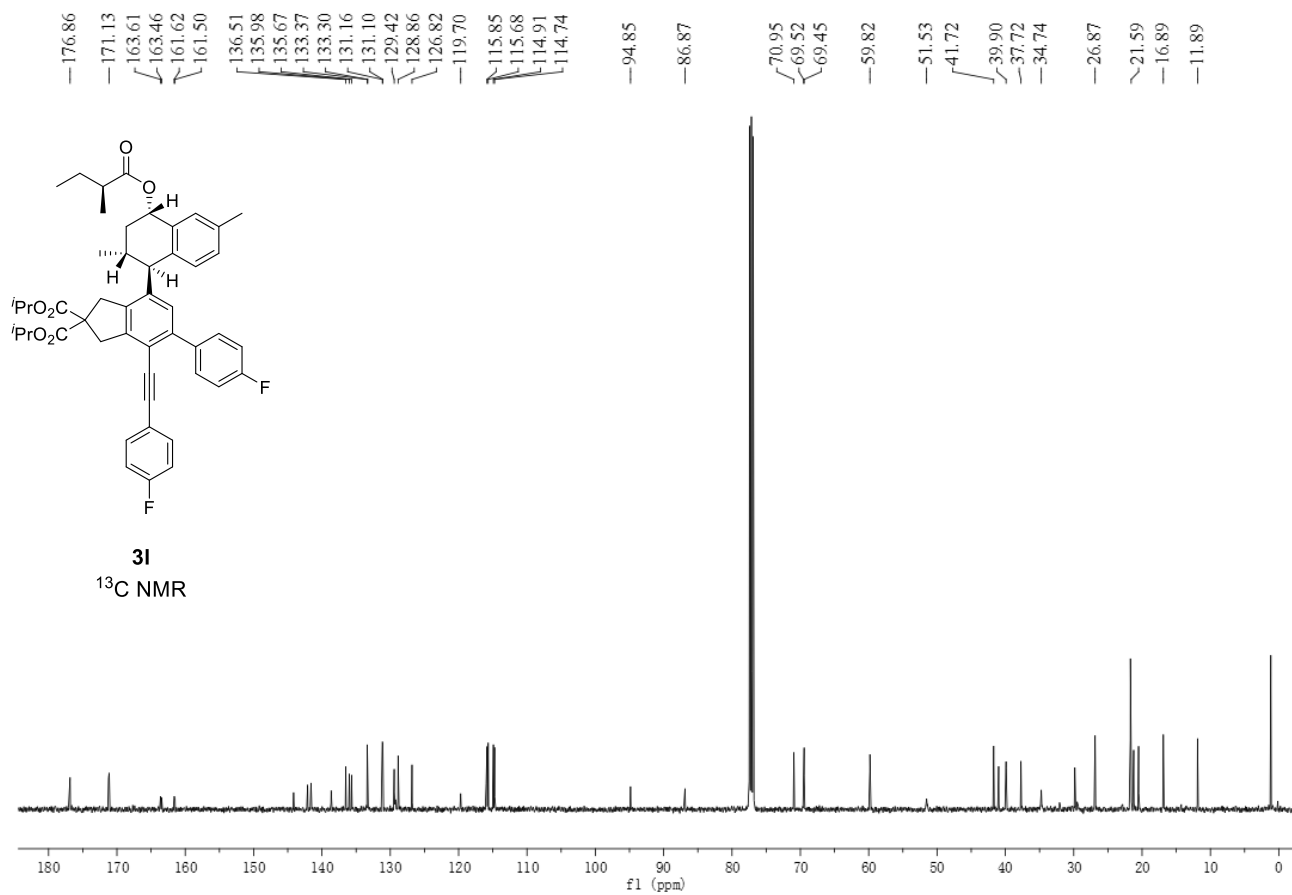

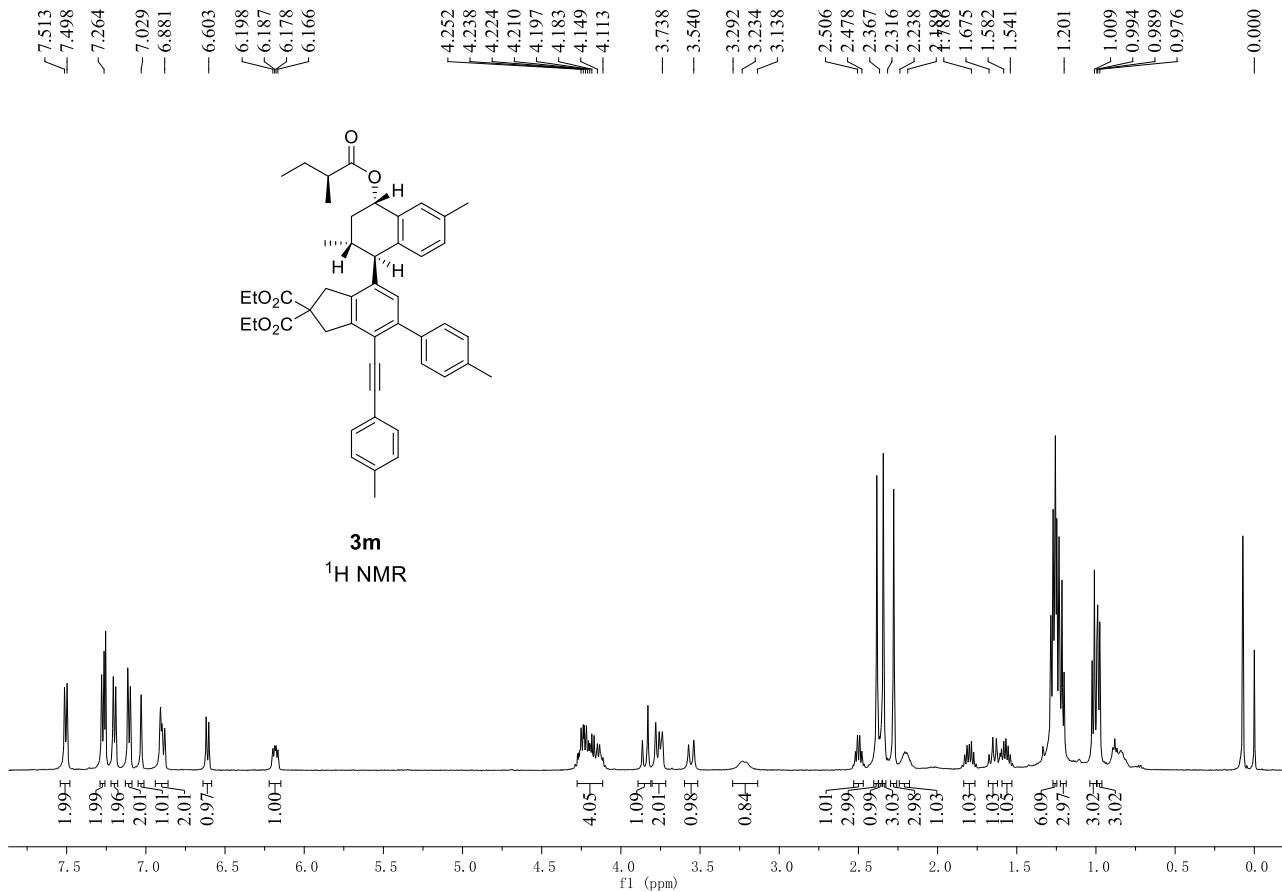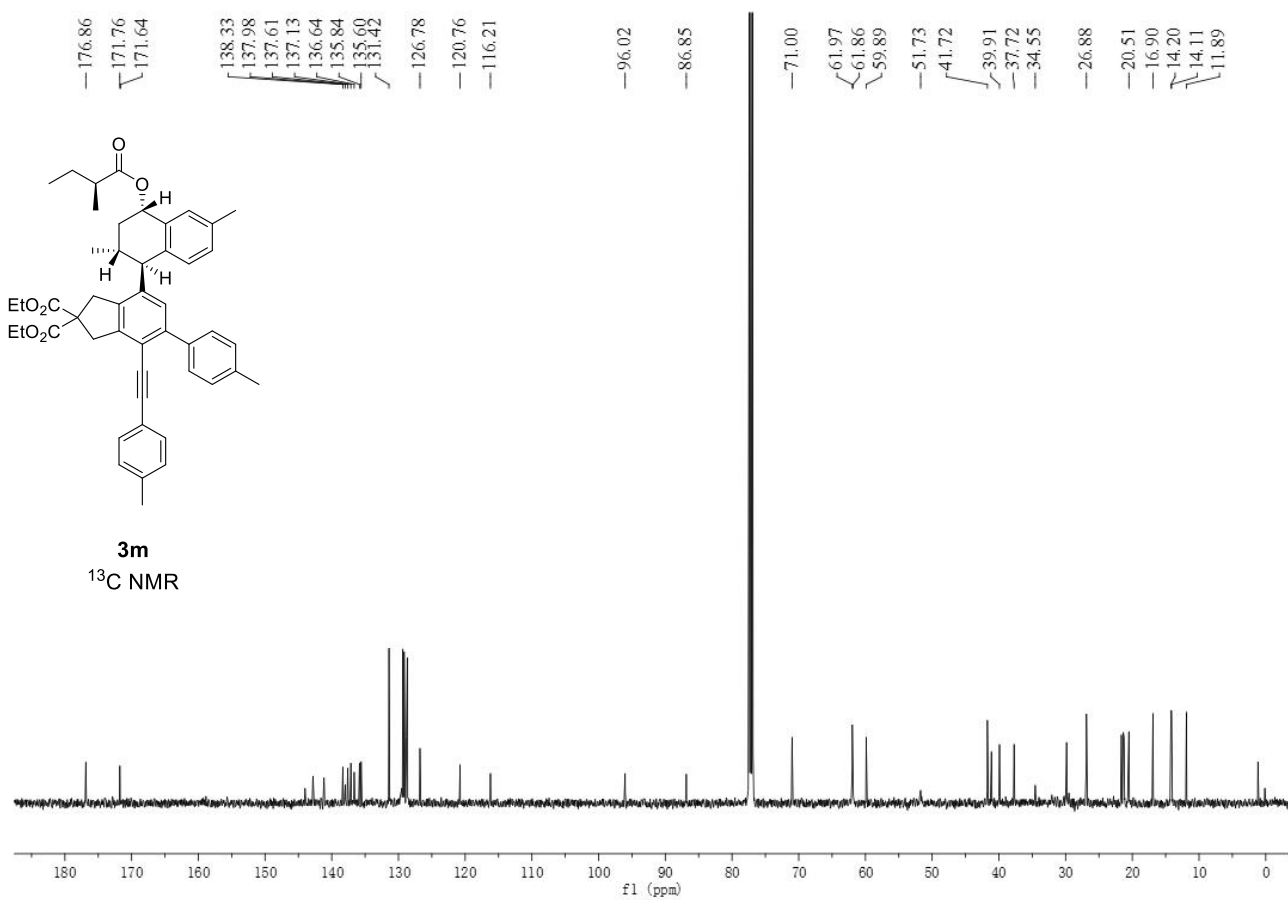



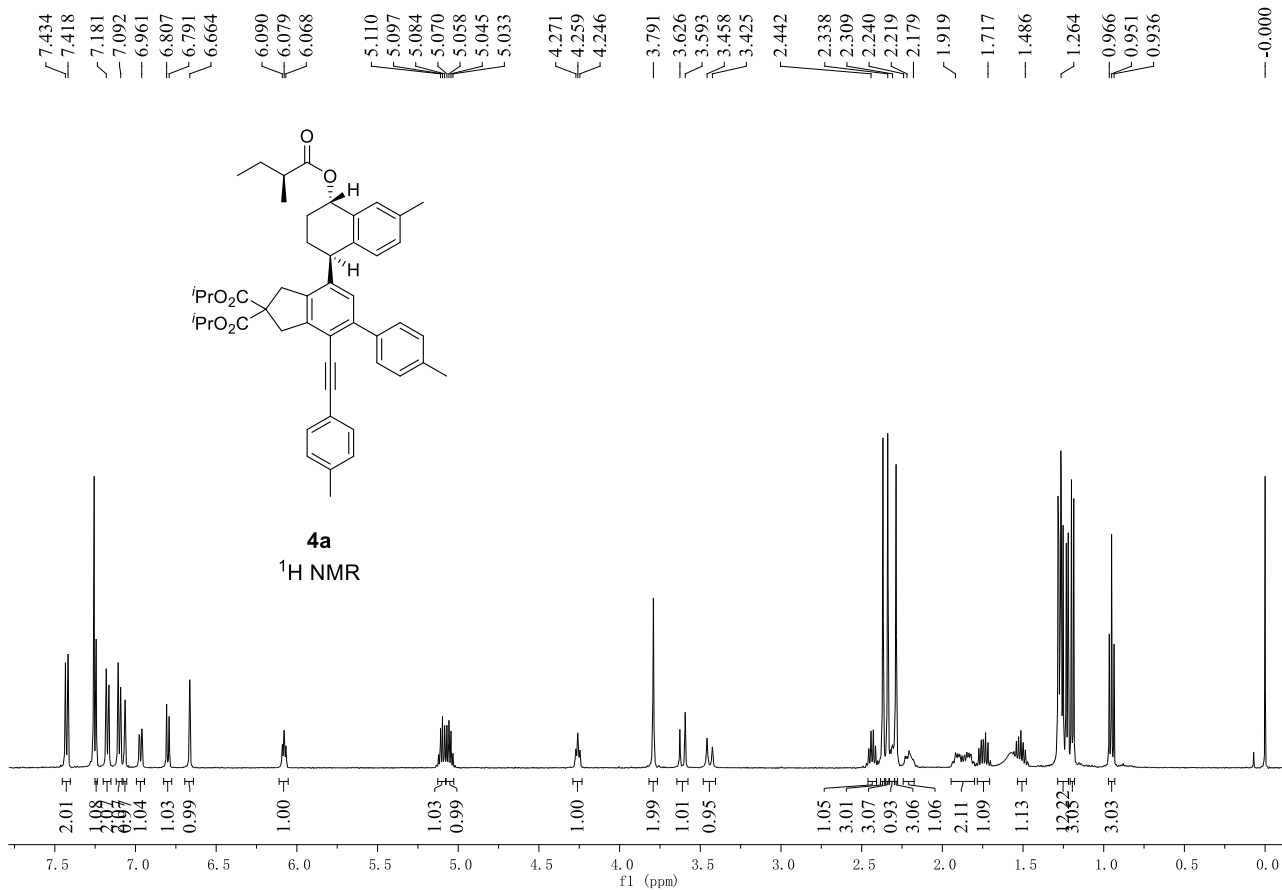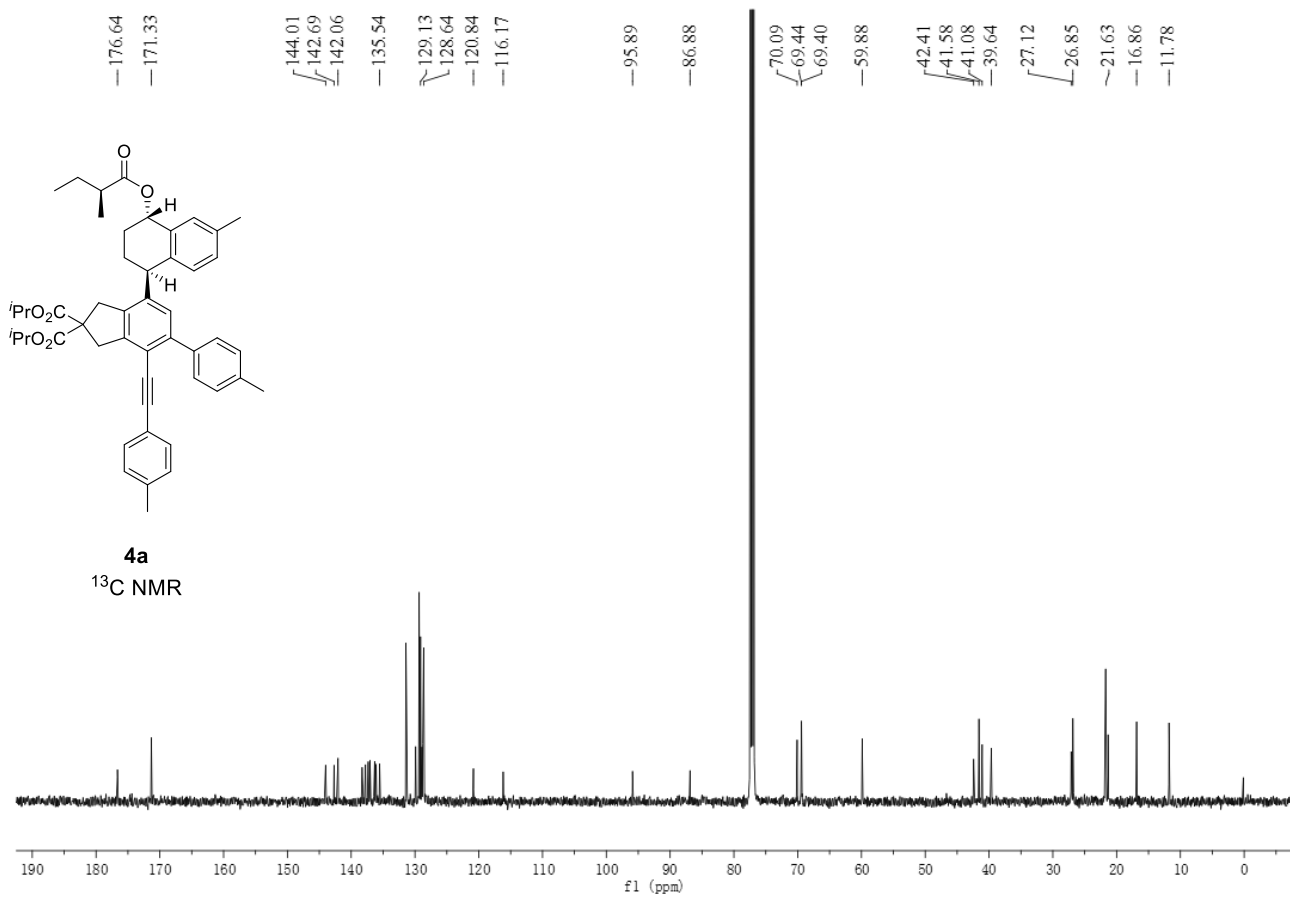

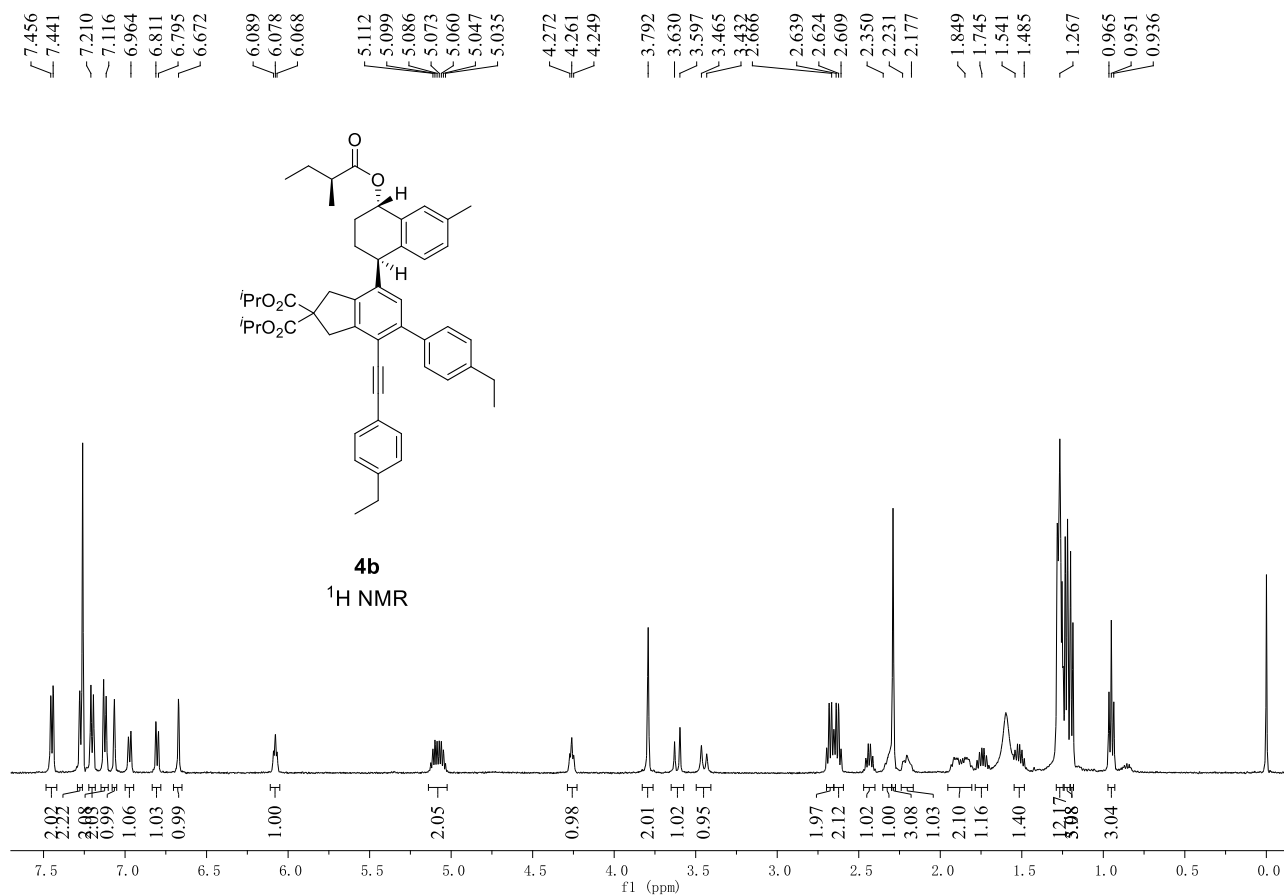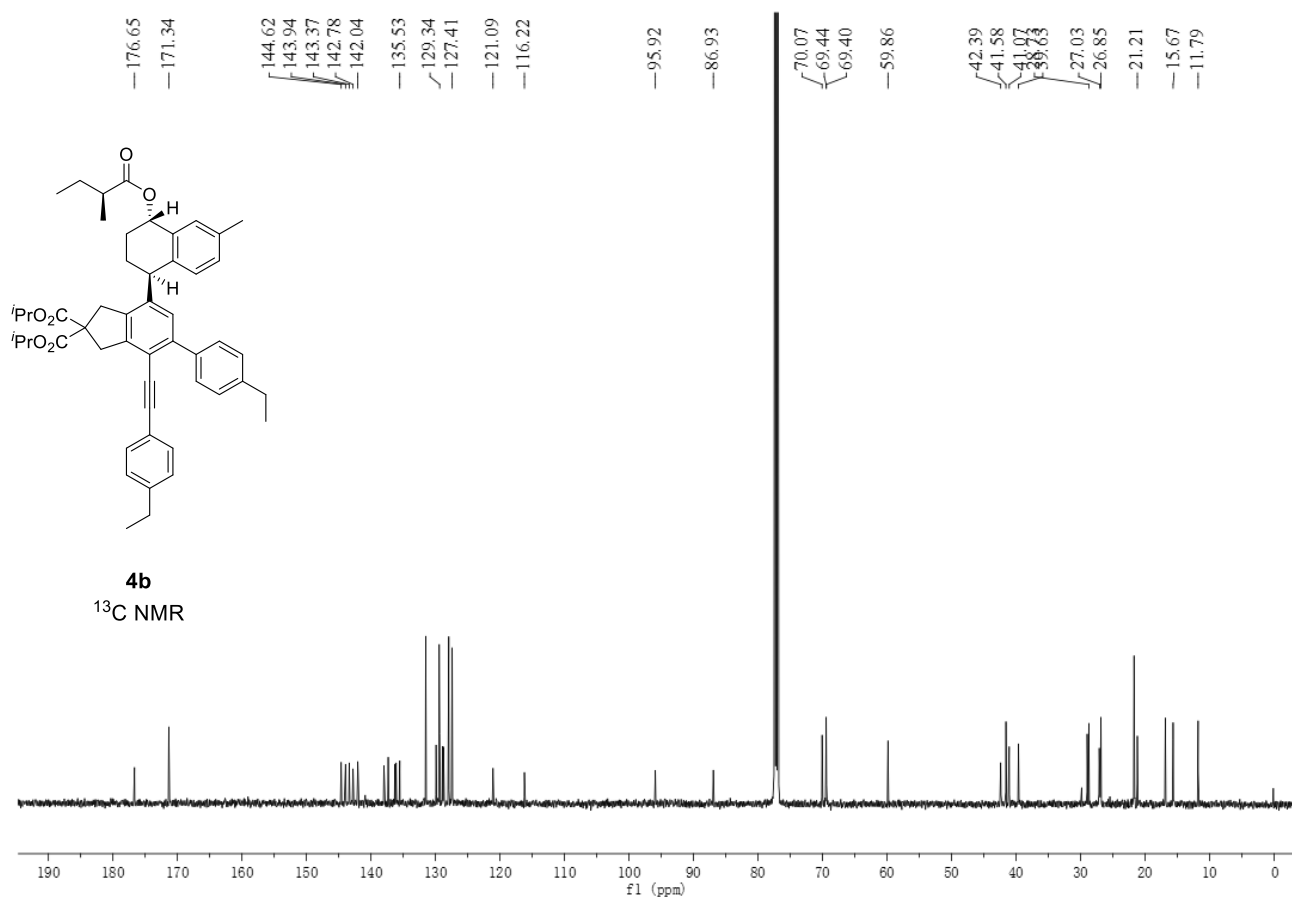

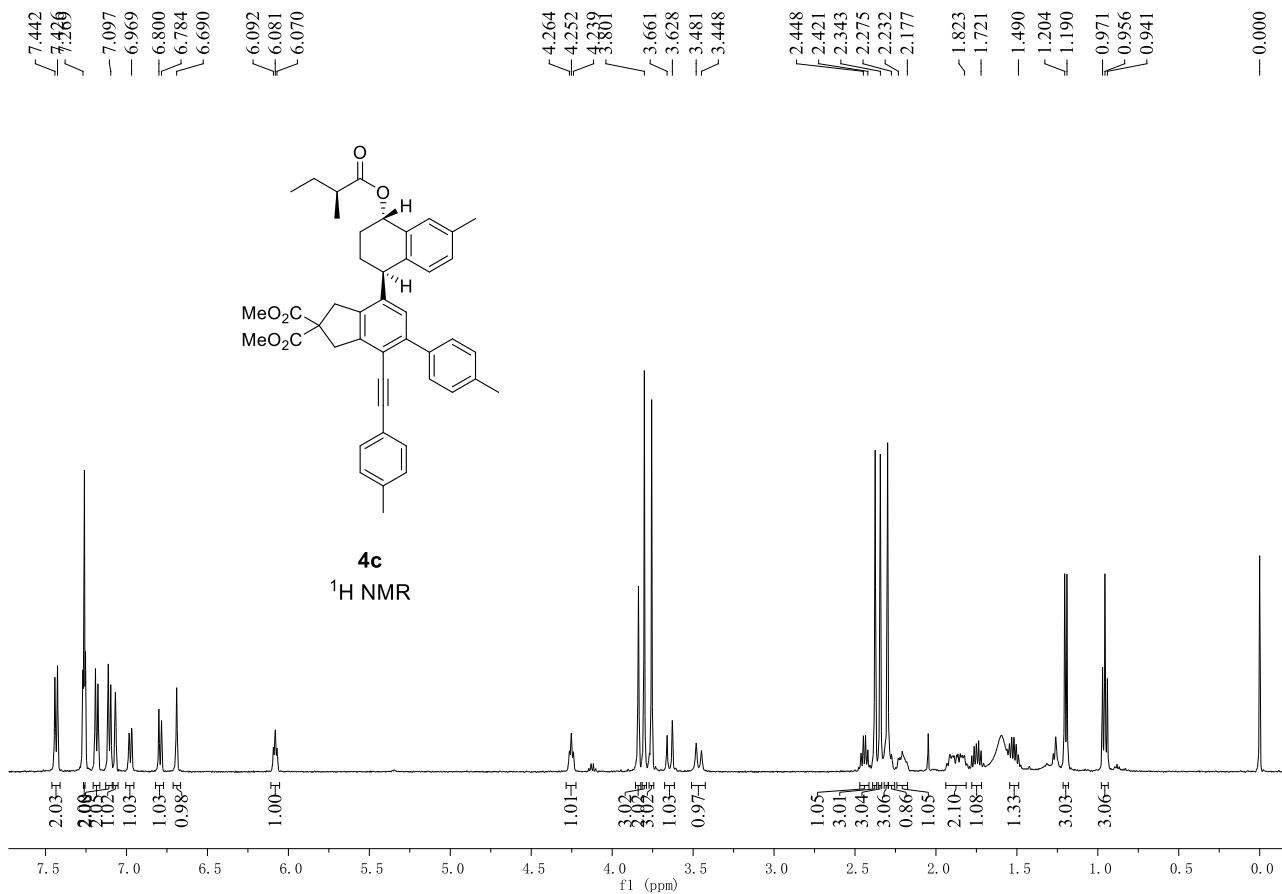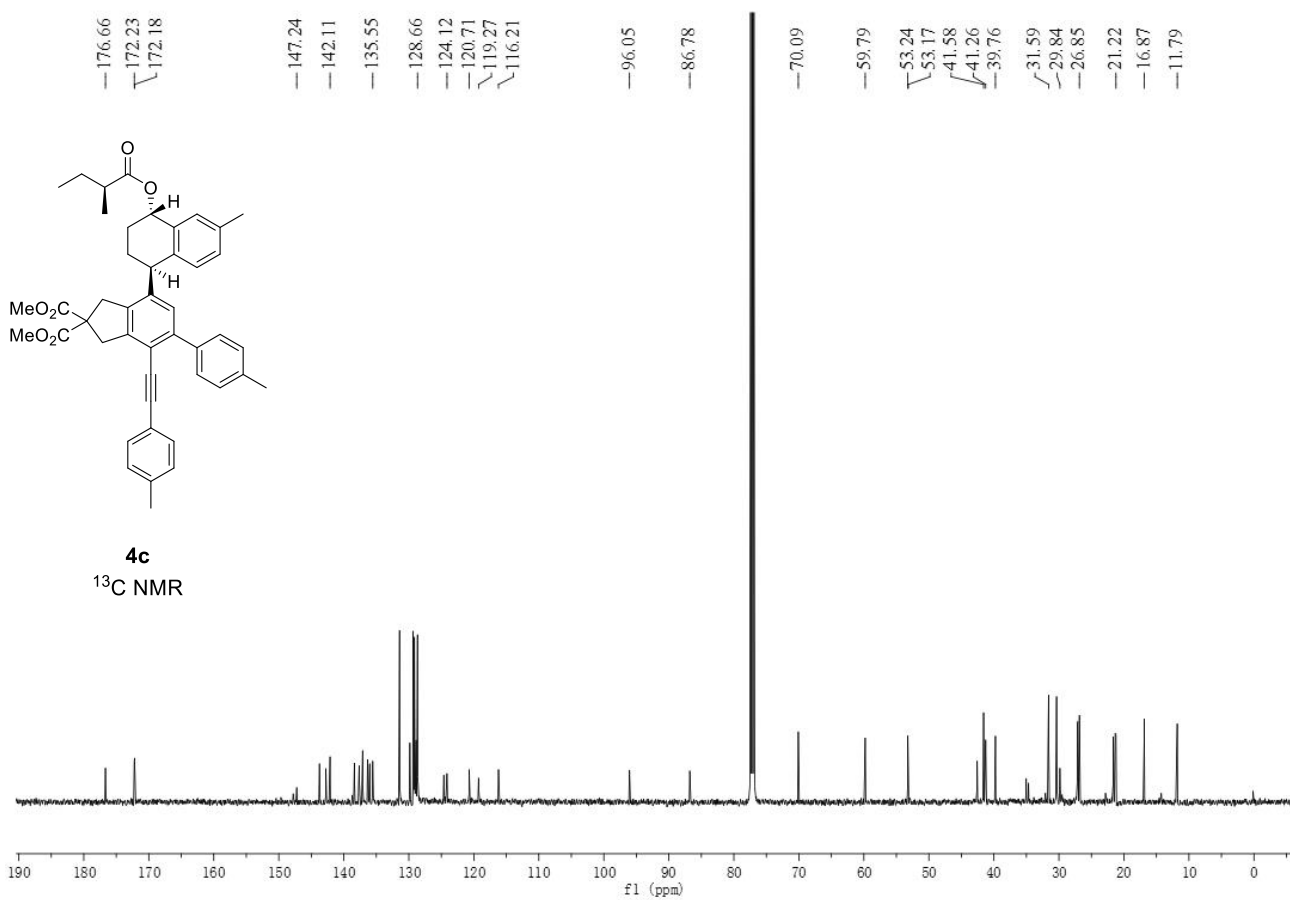

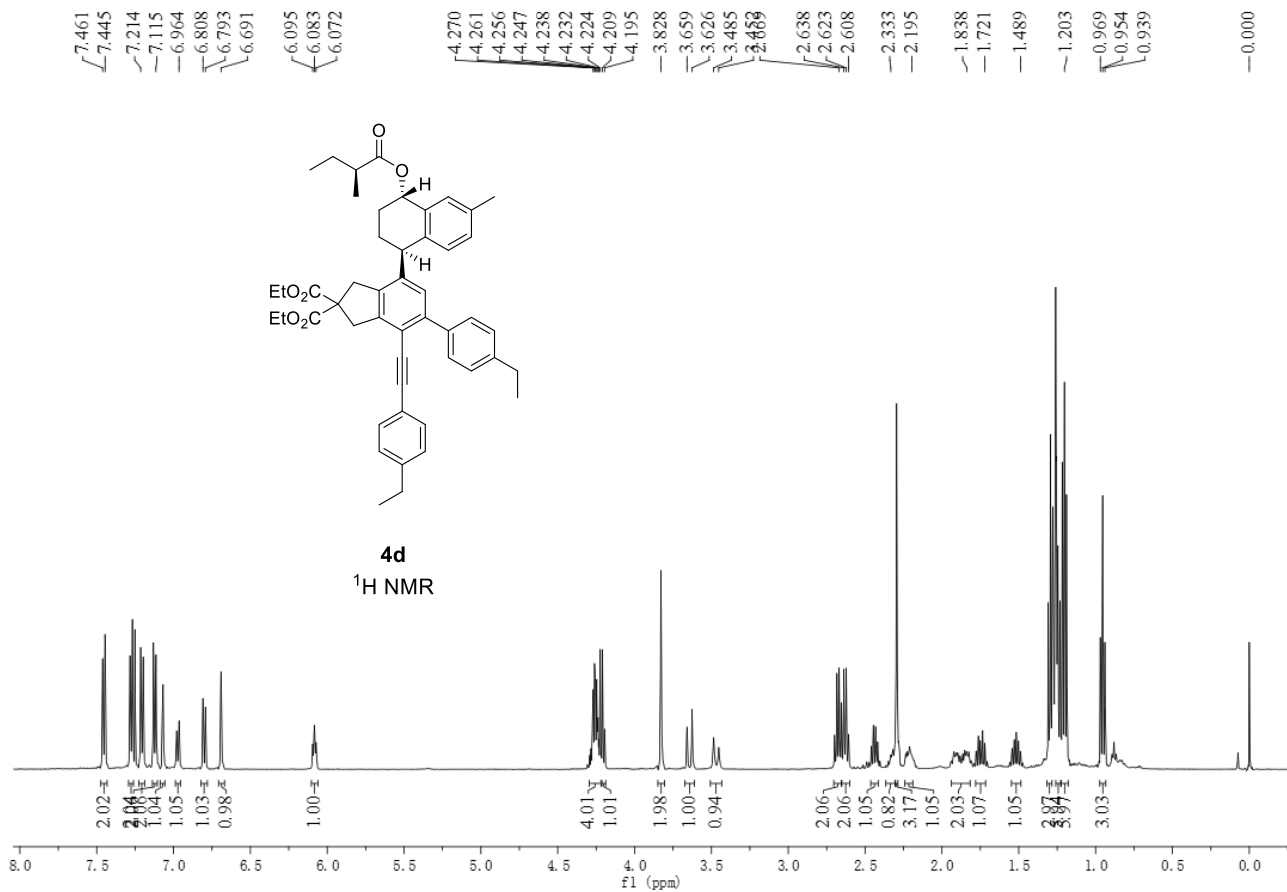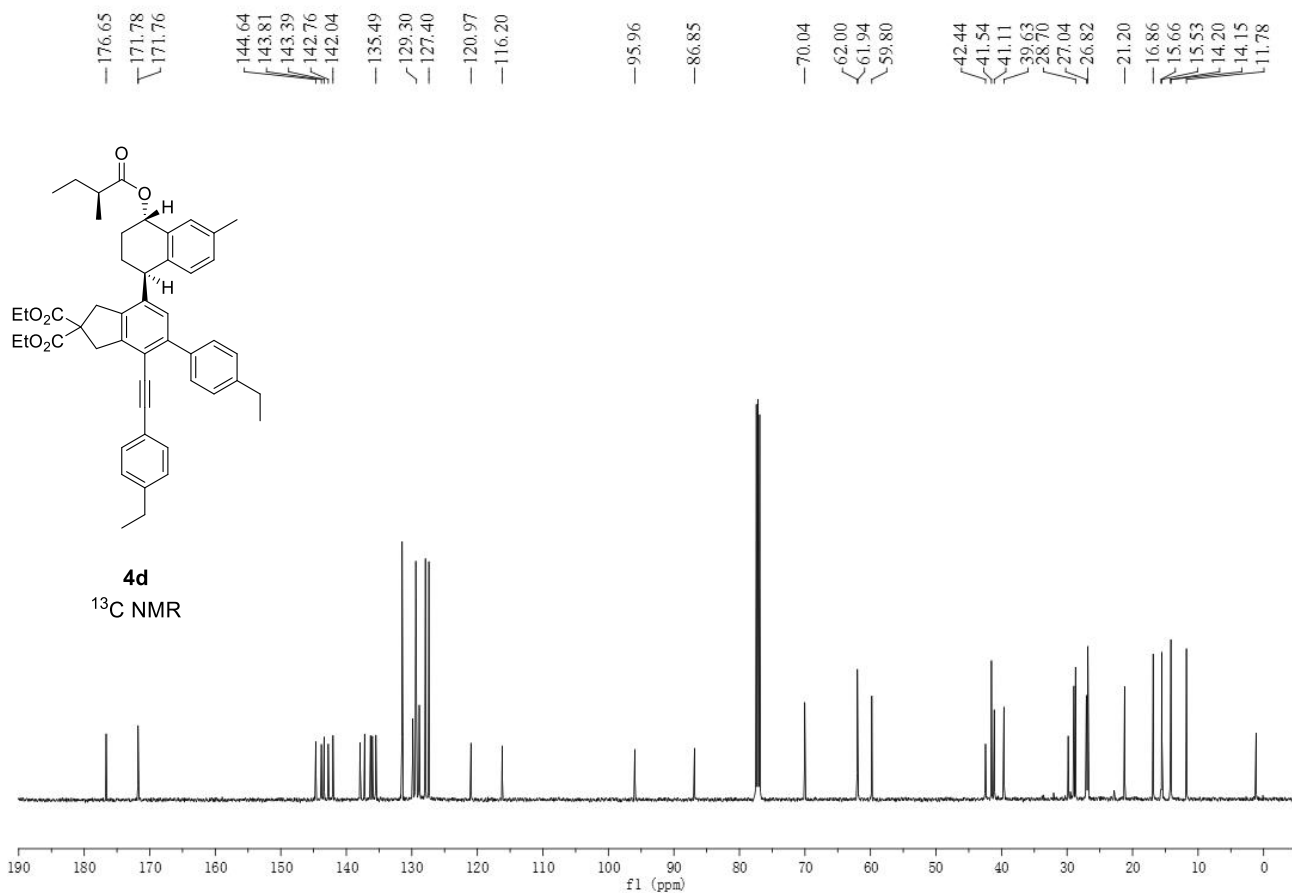

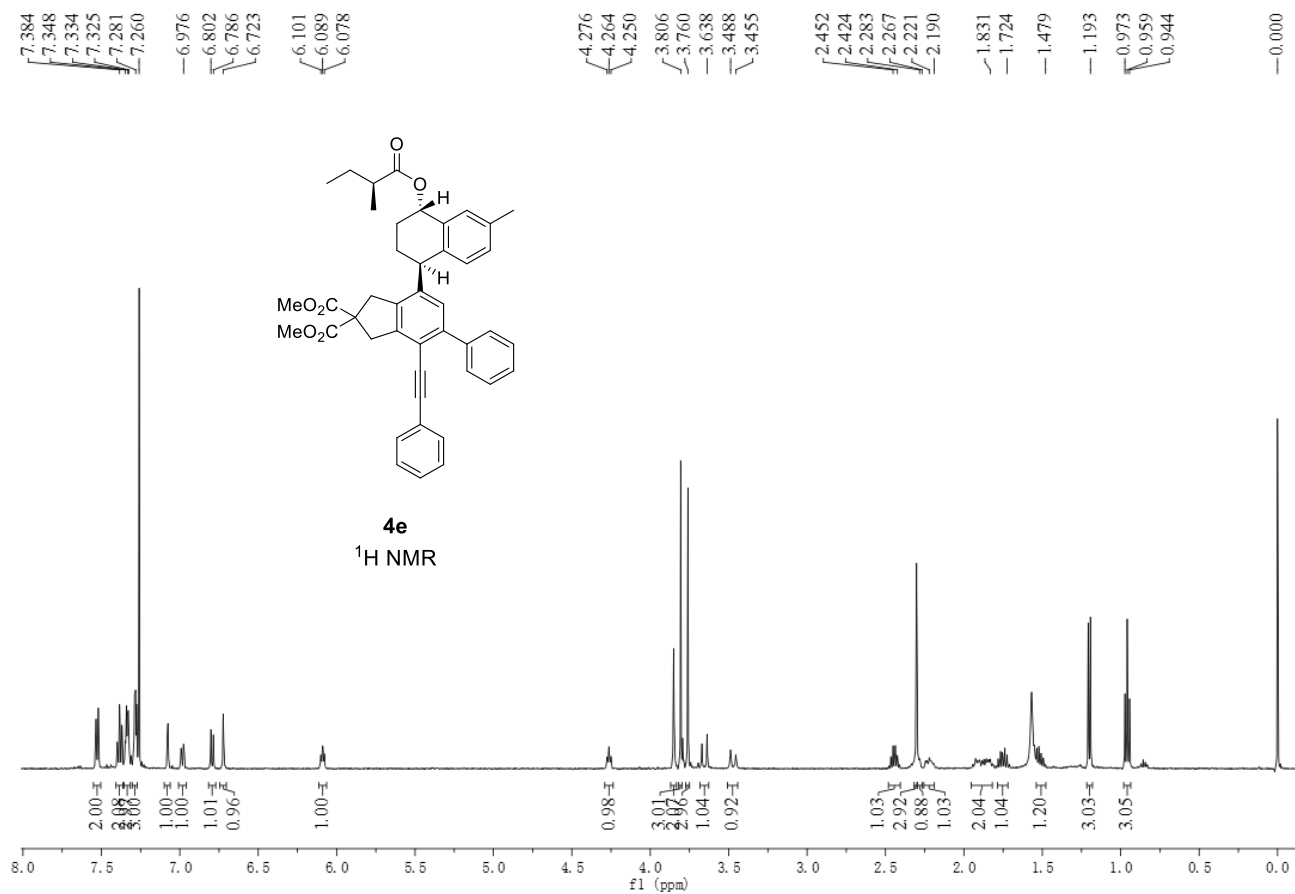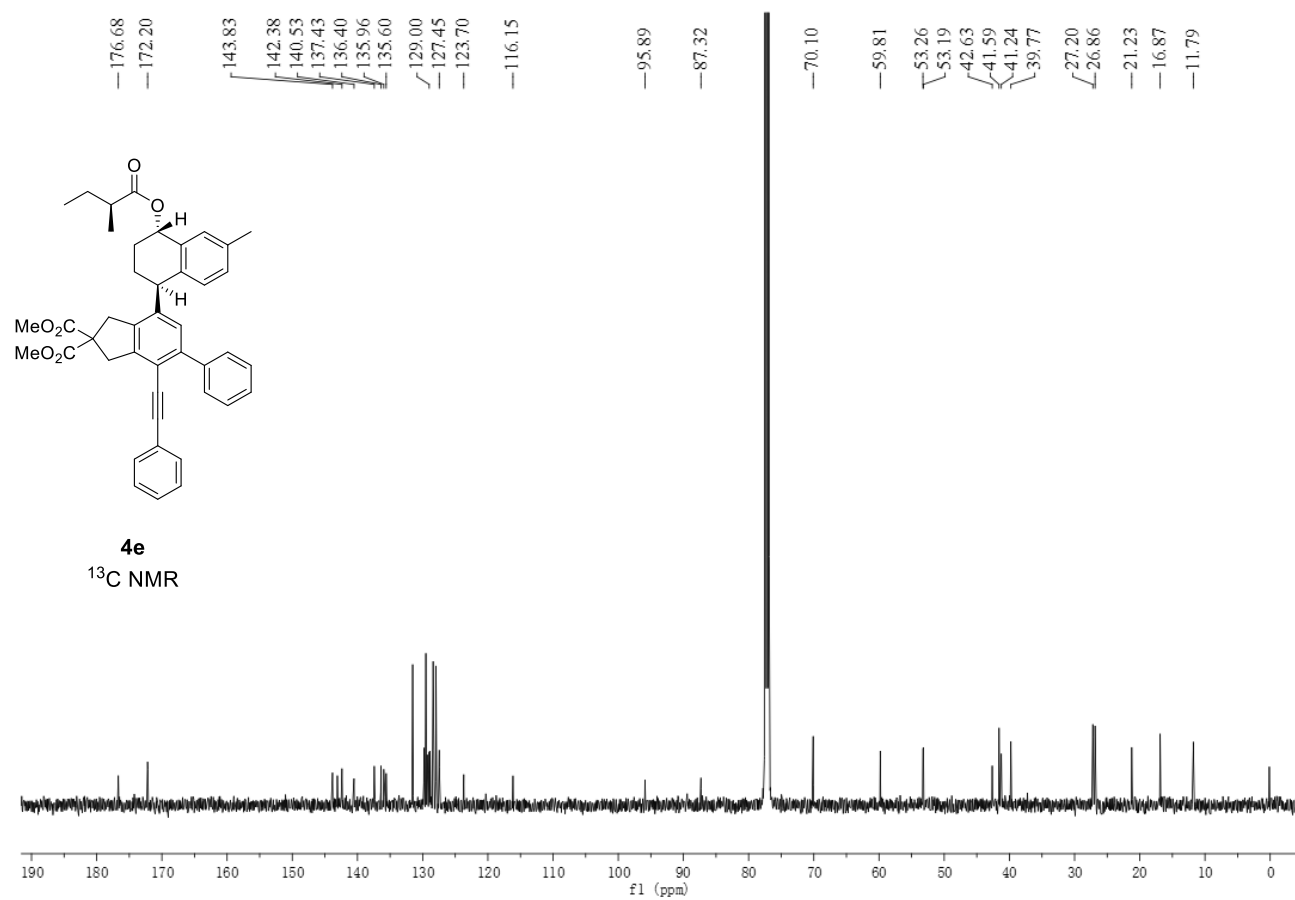

7.390  
7.340  
7.321  
7.283  
7.256  
6.971  
6.812  
6.796  
6.695  
6.099  
6.088  
6.077  
5.116  
5.103  
5.091  
5.077  
5.064  
5.051  
5.039  
4.285  
4.272  
4.260  
3.805  
3.605  
3.466  
3.433  
2.432  
2.331  
2.313  
2.257  
2.231  
2.187  
1.845  
1.720  
1.489  
1.257  
0.969  
0.954  
0.939  
-0.000

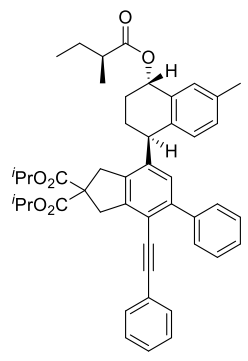

**4f**  
<sup>1</sup>H NMR

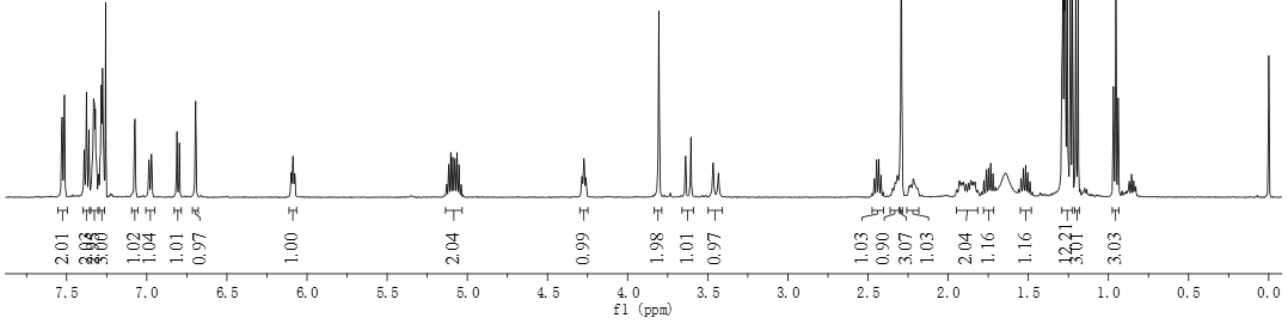

176.64  
171.29  
144.07  
142.31  
140.62  
137.65  
136.37  
136.02  
135.57  
128.90  
127.38  
123.80  
116.09  
95.72  
87.41  
71.77  
70.07  
69.48  
69.44  
62.21  
59.87  
42.45  
41.58  
41.04  
39.64  
27.19  
27.12  
26.85  
21.66  
16.86  
14.14  
11.78

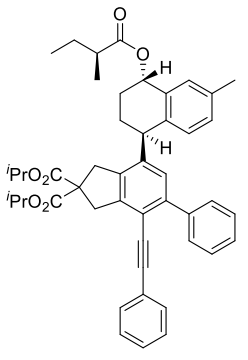

**4f**  
<sup>13</sup>C NMR

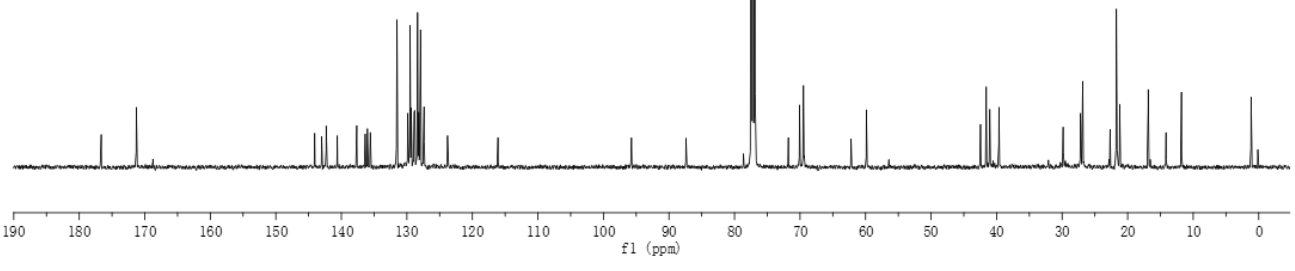



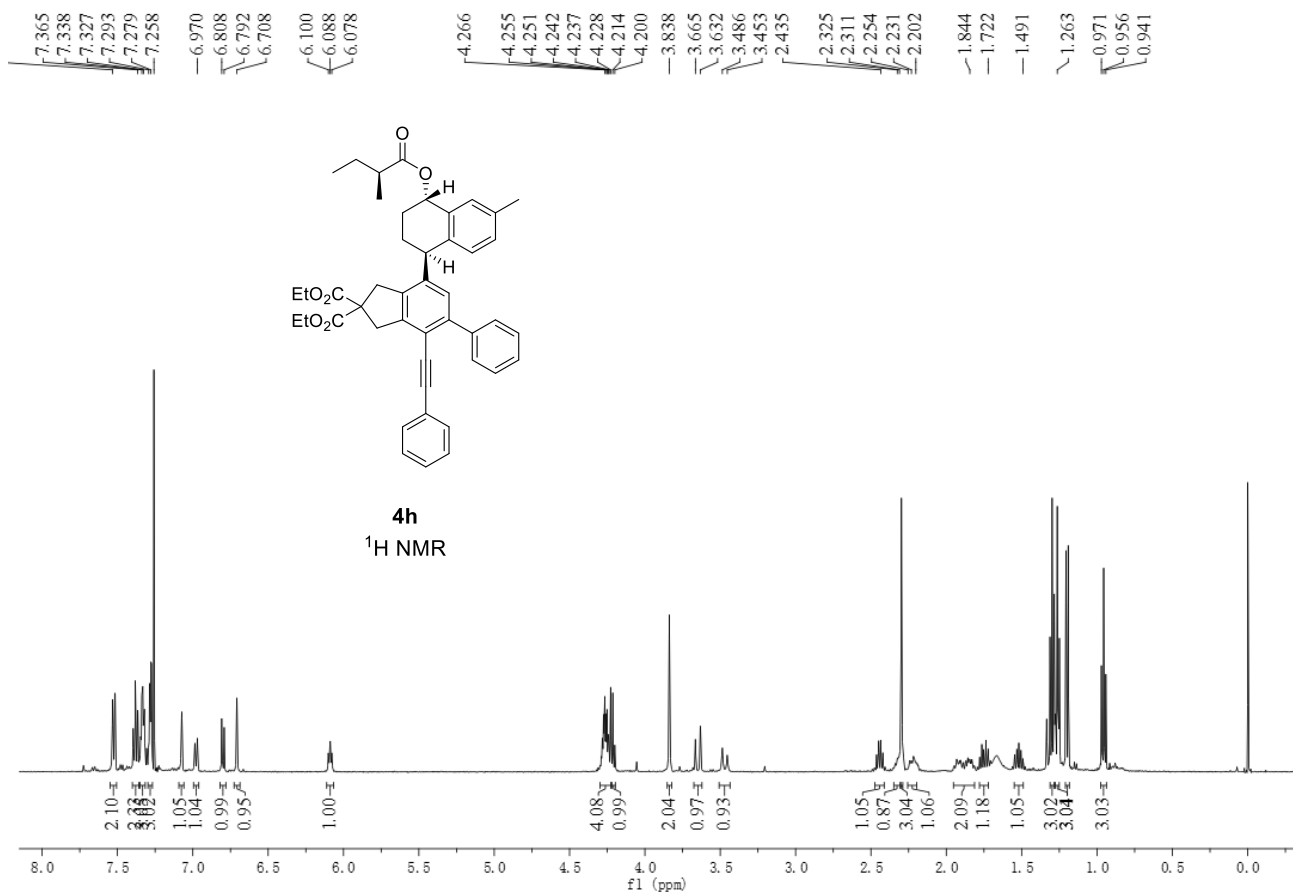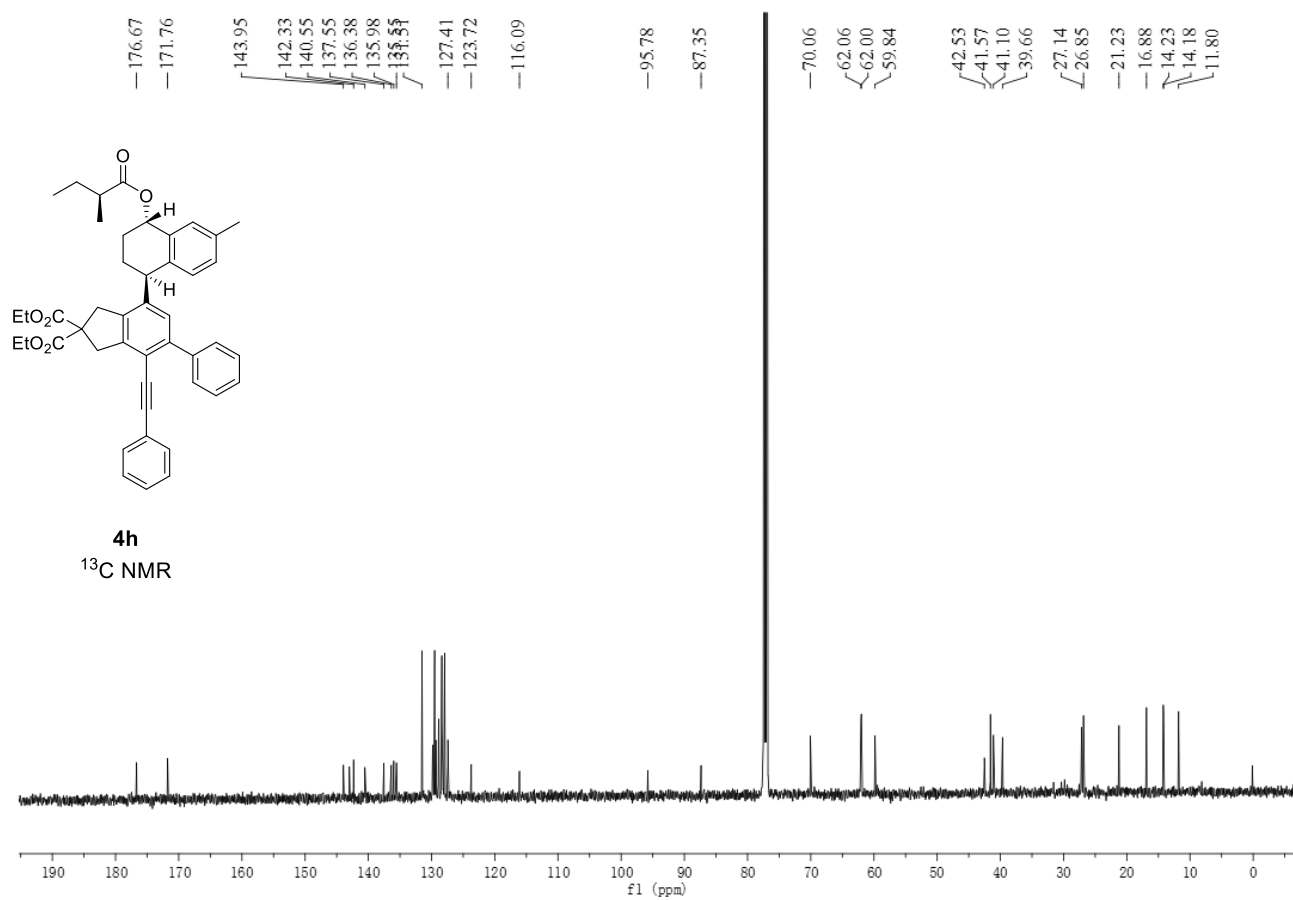



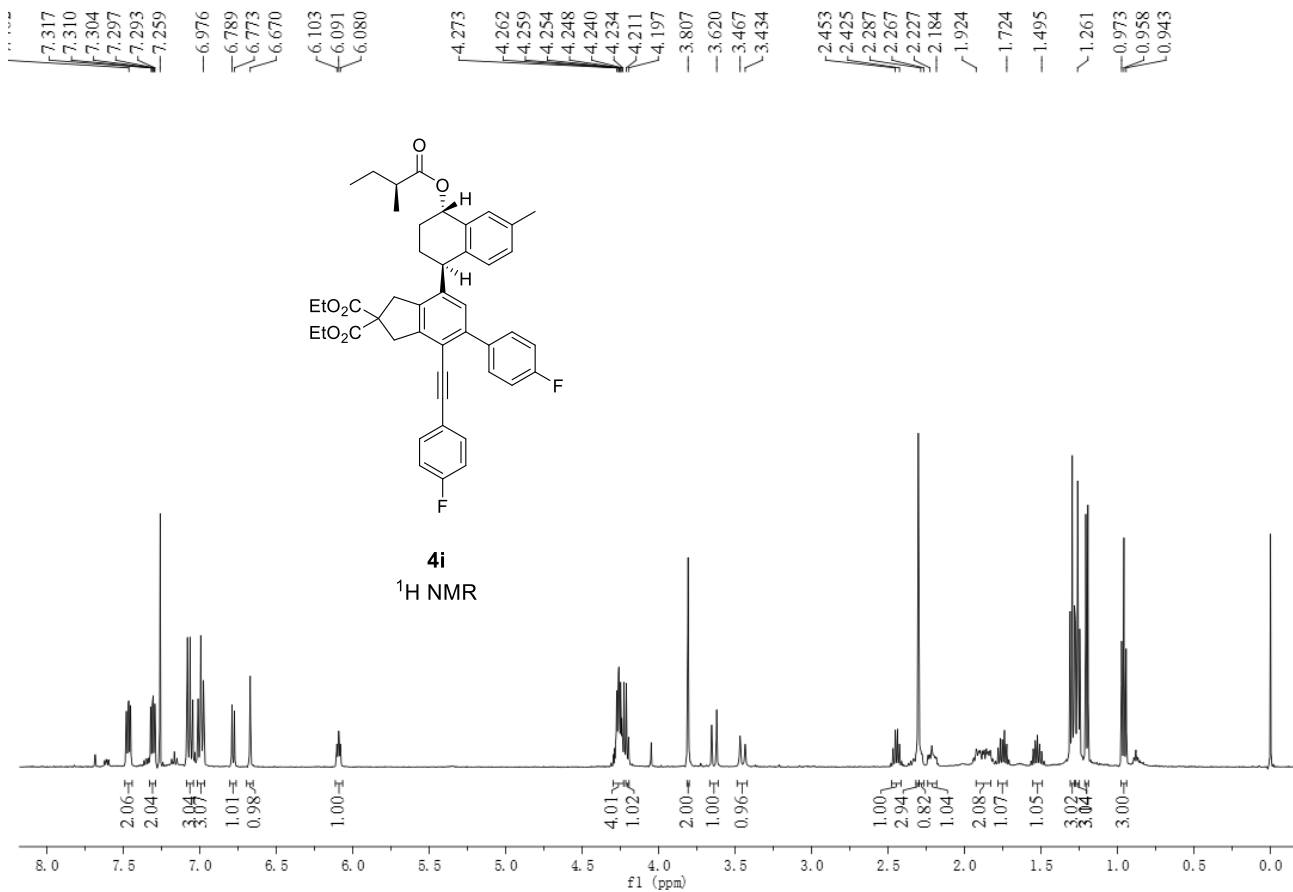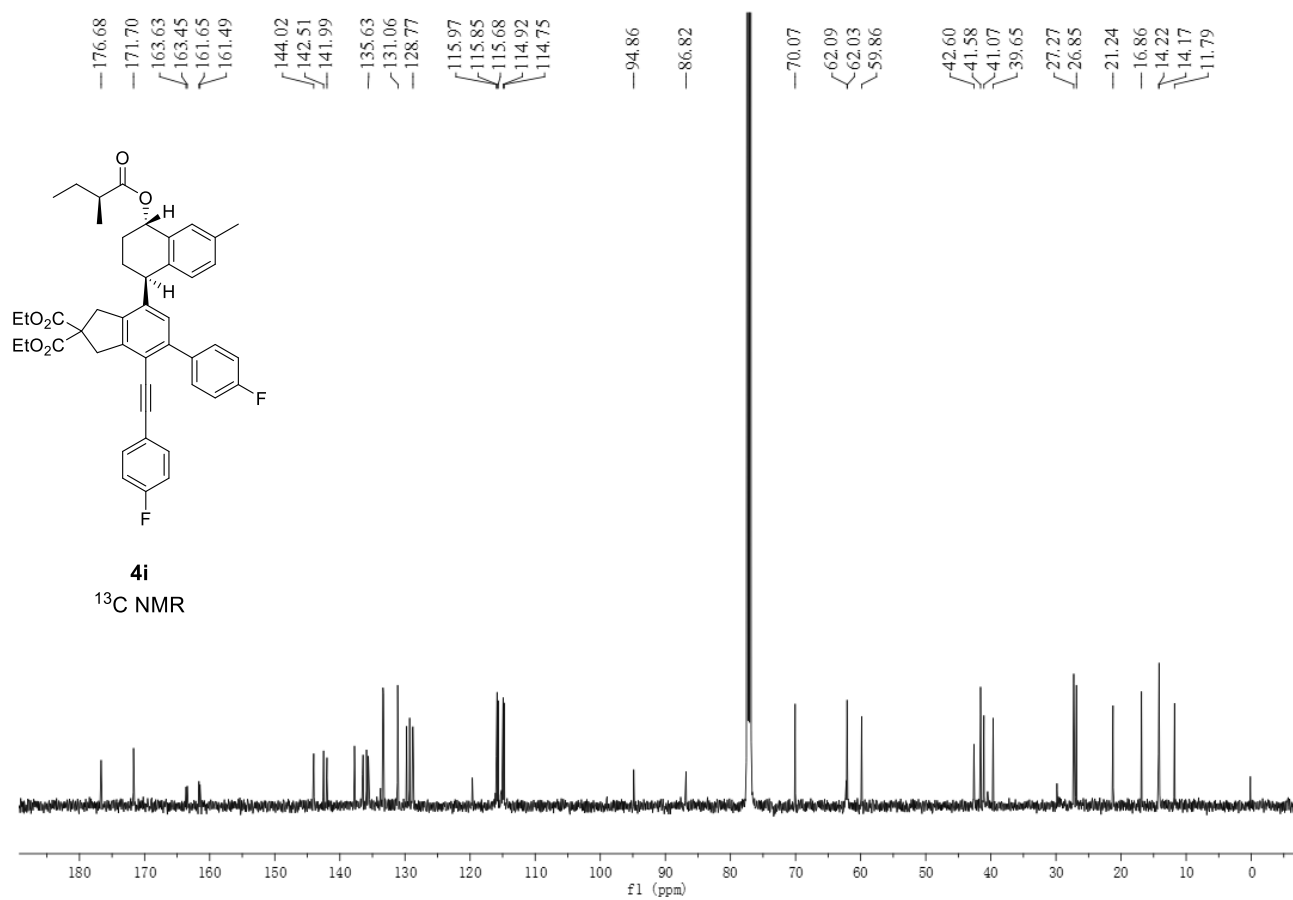

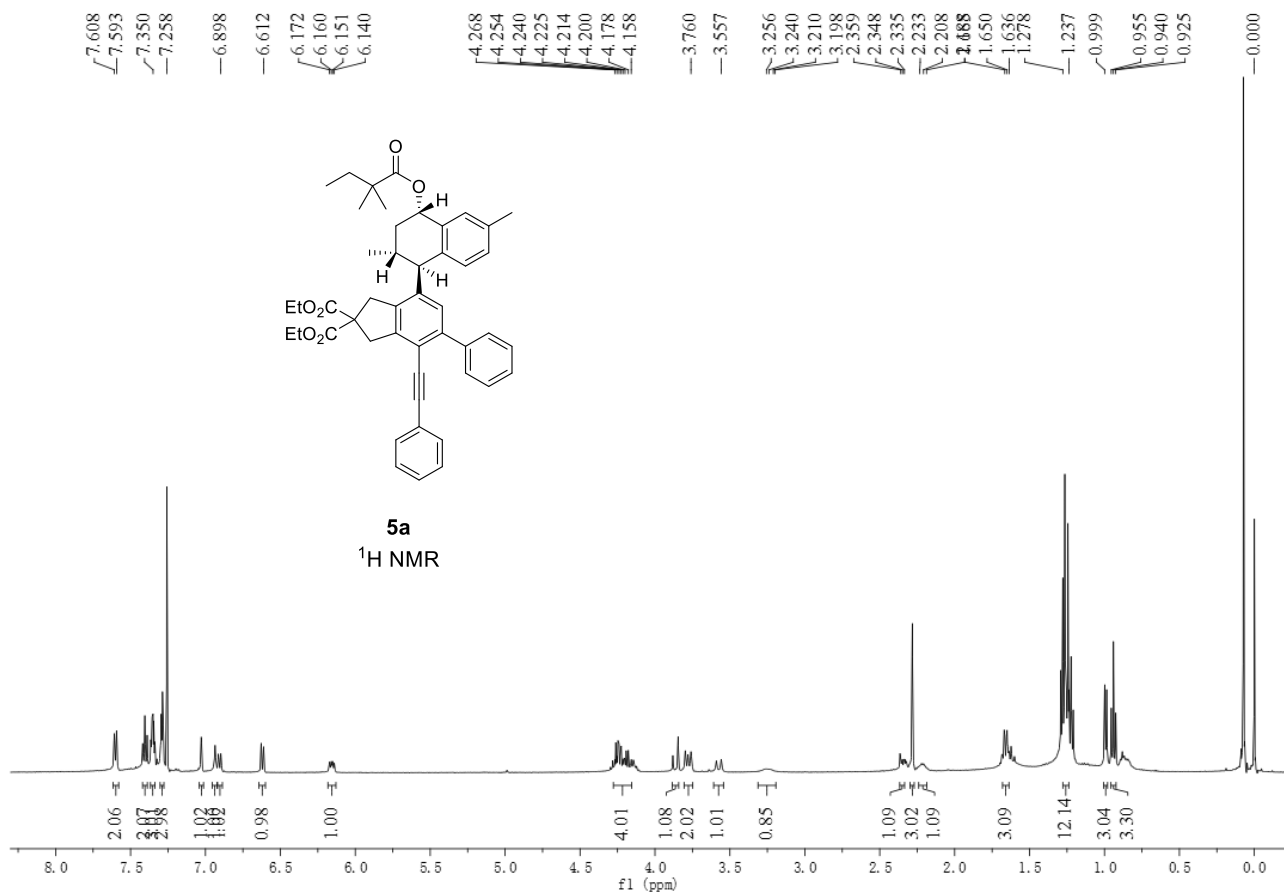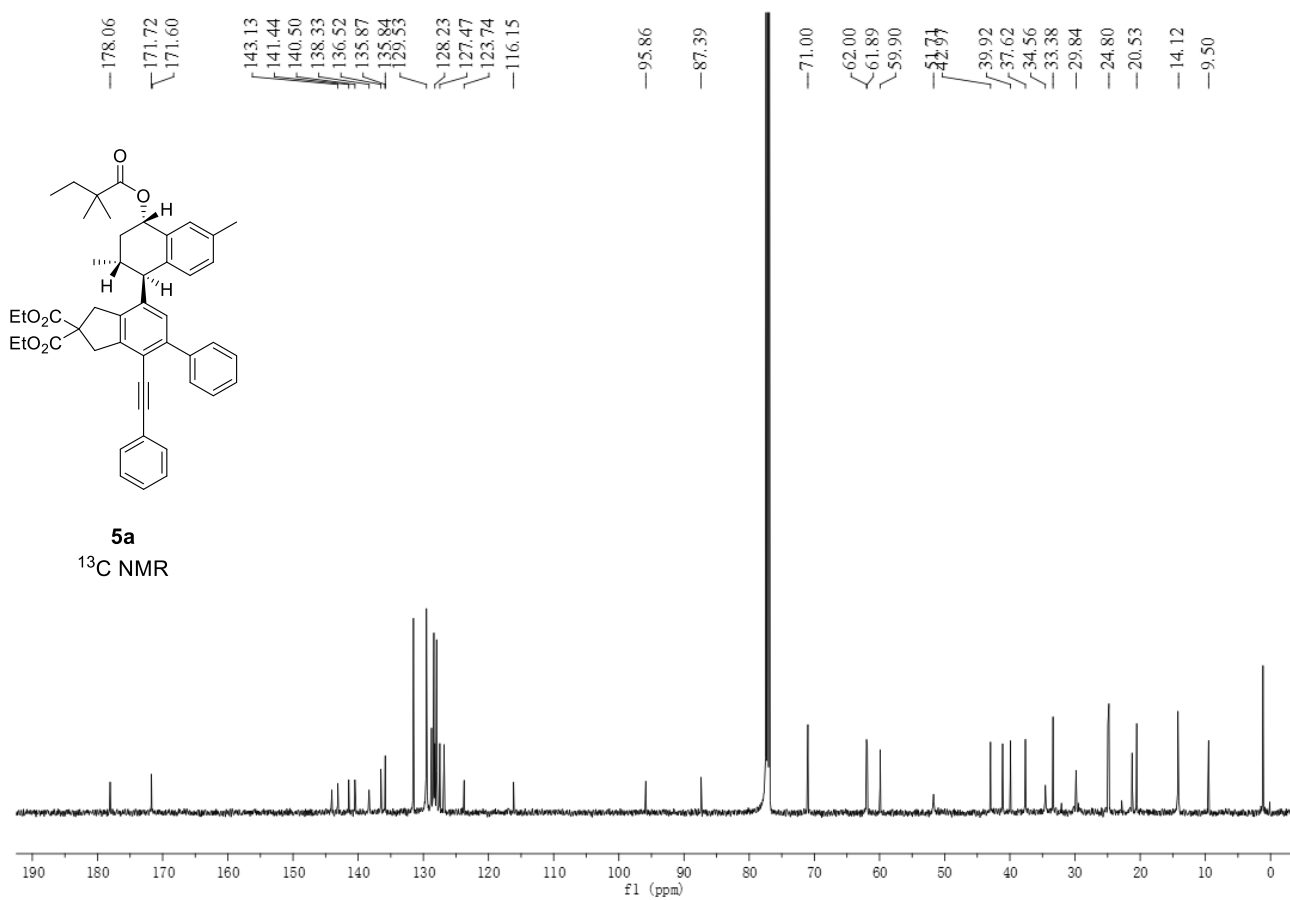

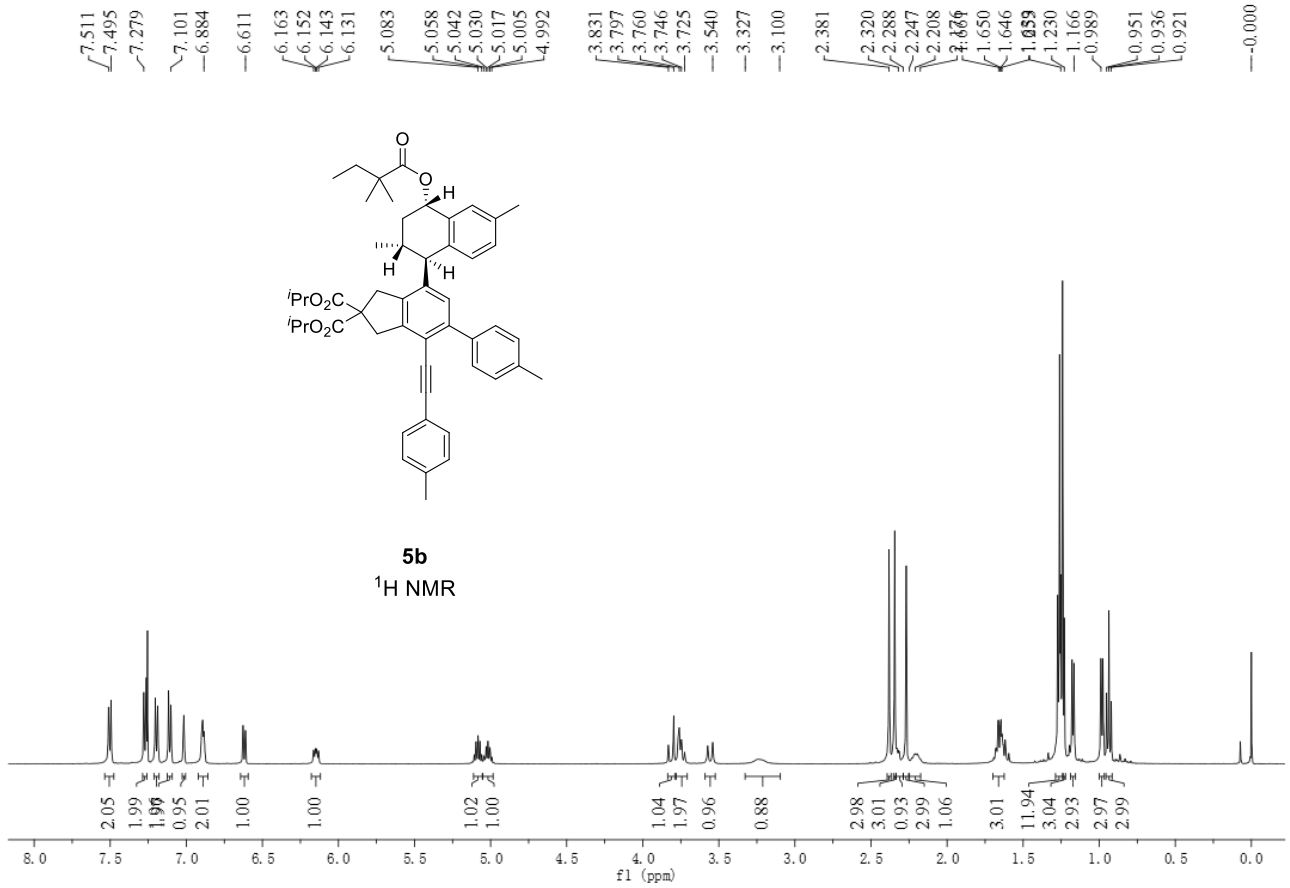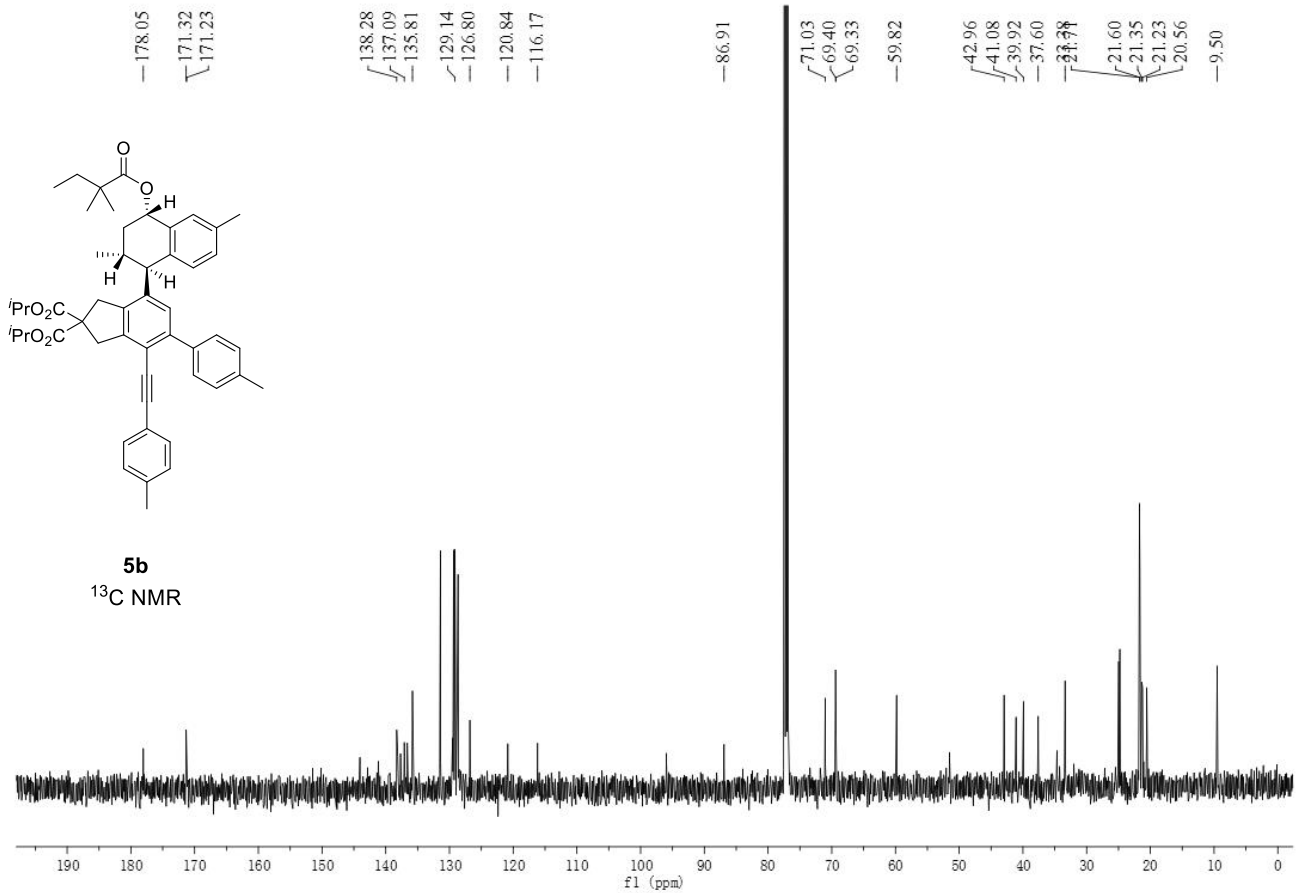



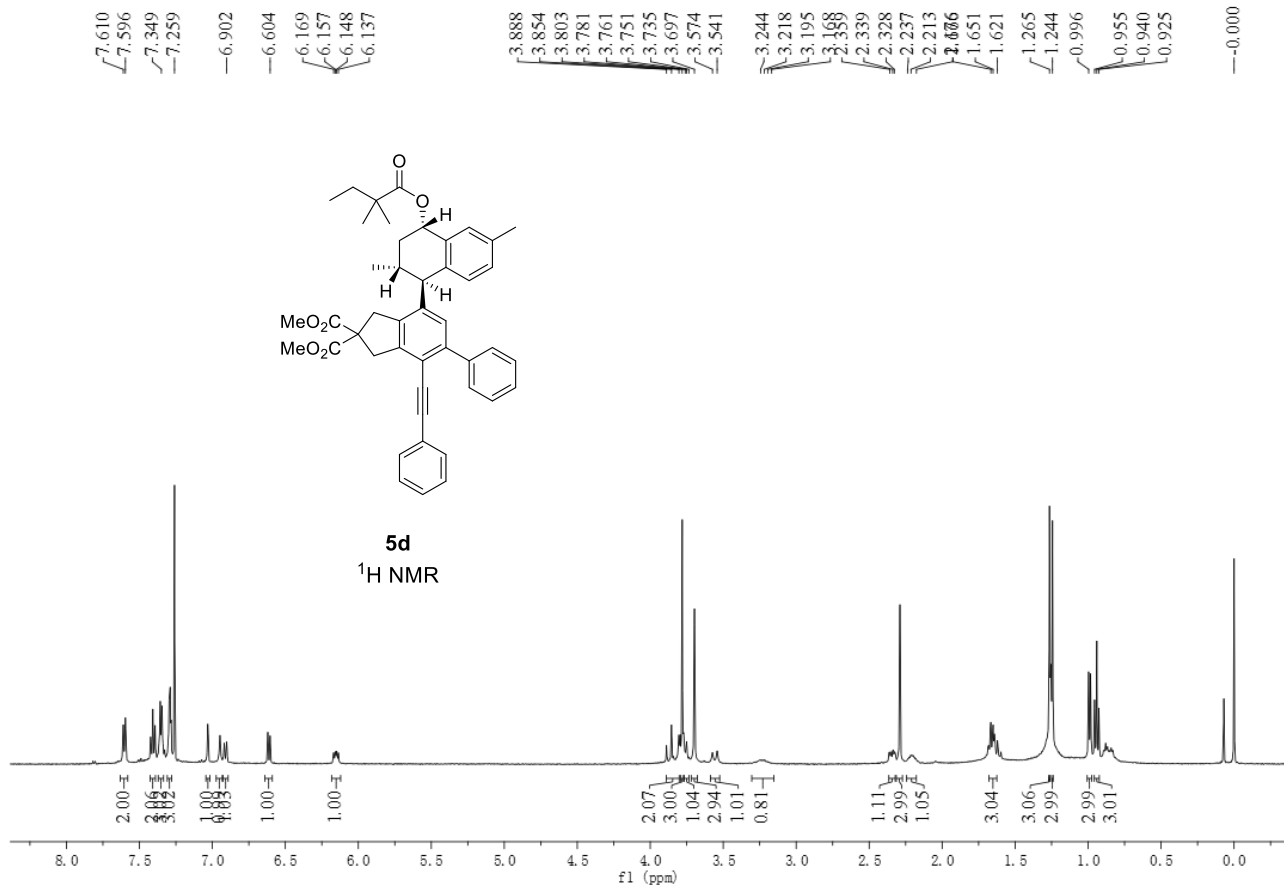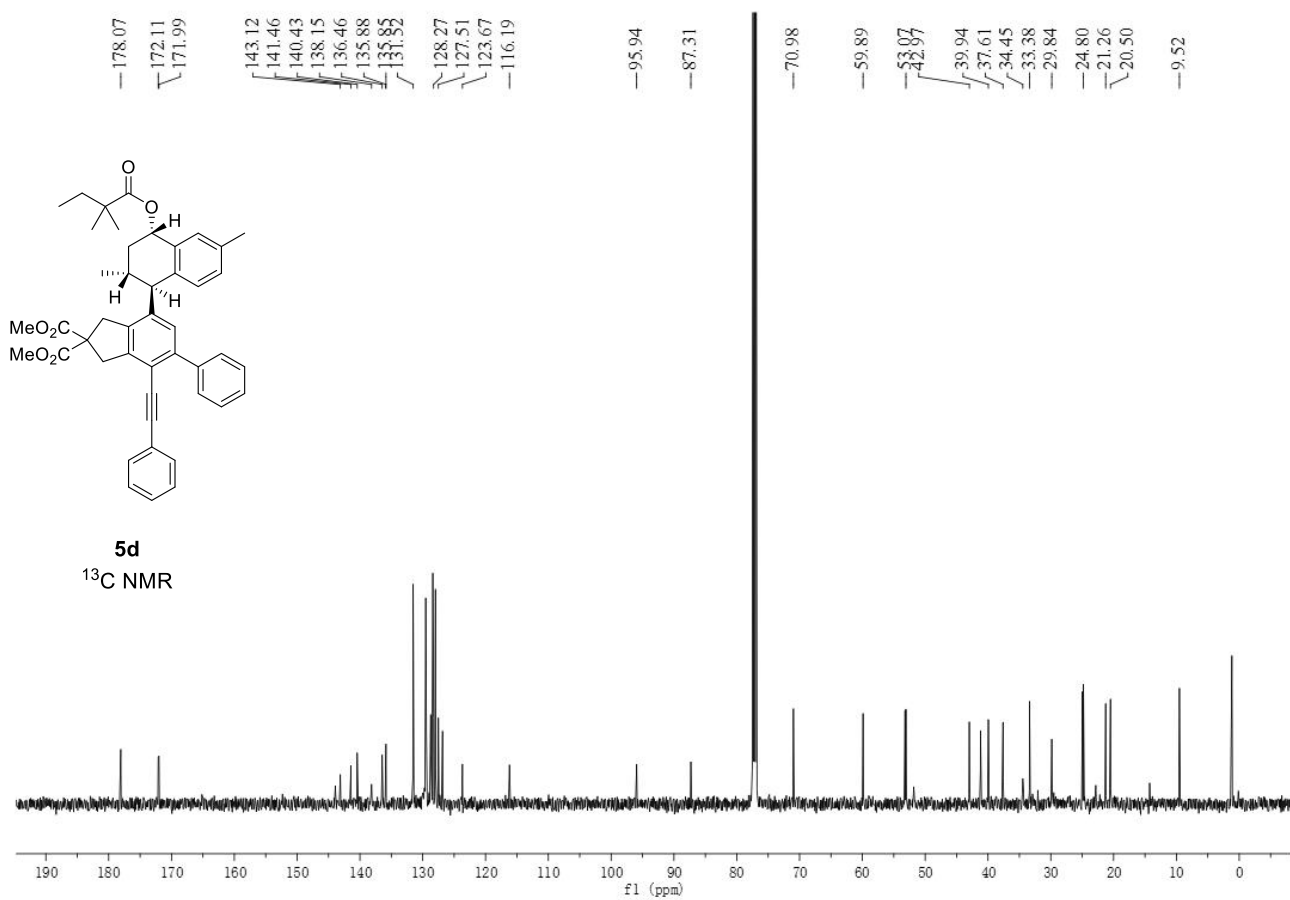

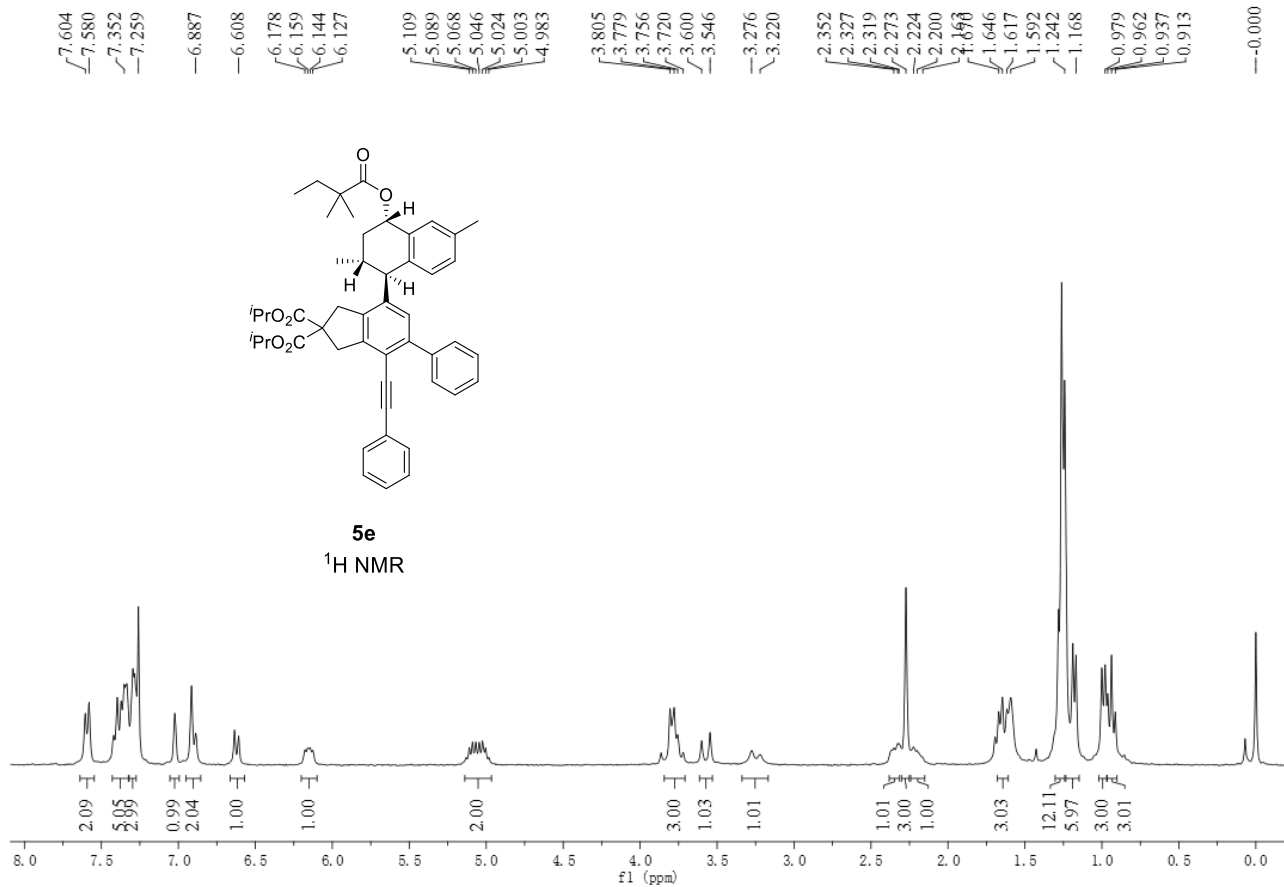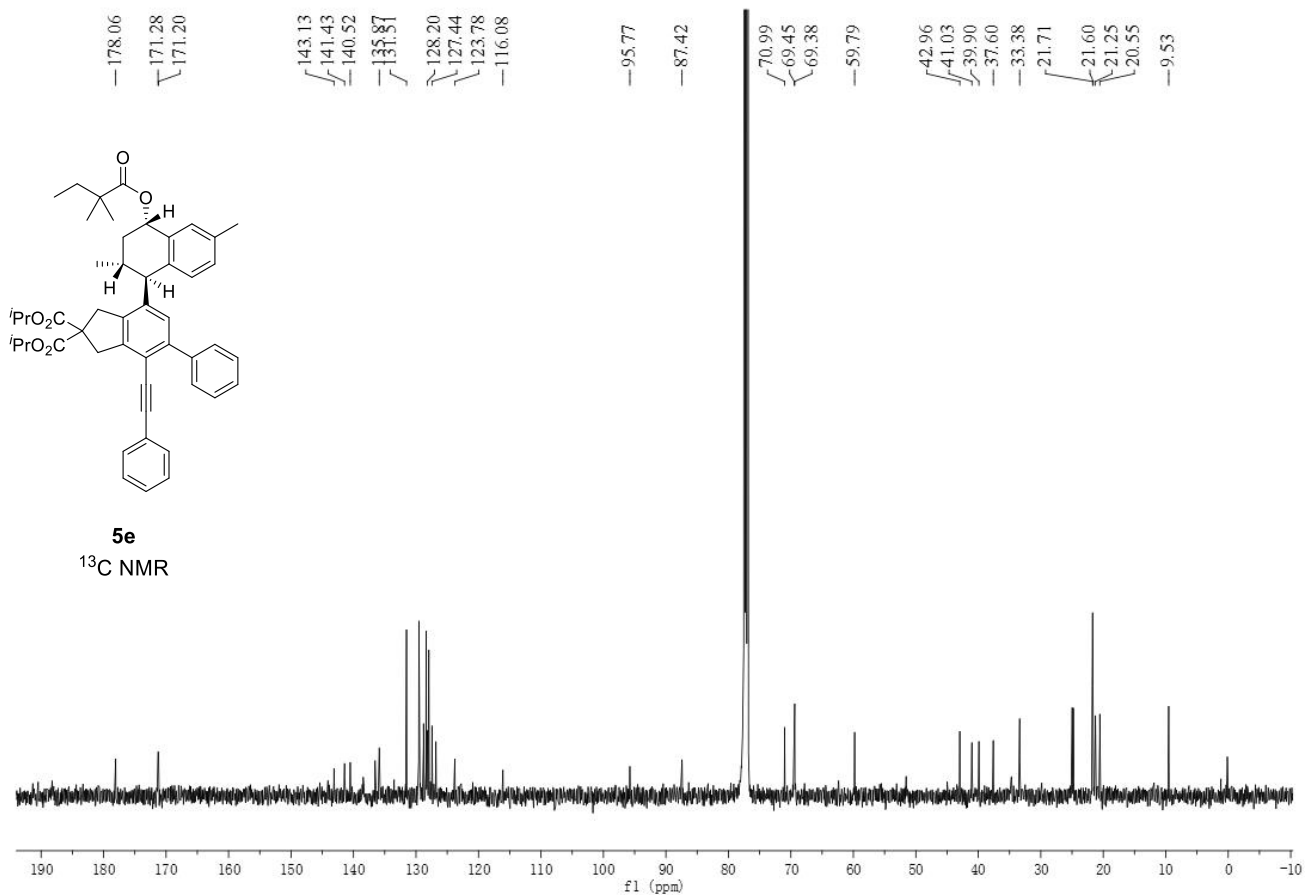

7.295  
7.283  
7.278  
7.272  
7.261  
6.909  
6.871  
6.583  
6.166  
6.154  
6.145  
6.133  
5.099  
5.087  
5.074  
5.062  
5.046  
5.033  
5.021  
5.008  
4.996  
3.780  
3.759  
3.739  
3.704  
3.585  
3.552  
3.311  
3.279  
3.260  
3.194  
2.343  
2.276  
2.212  
2.187  
2.168  
2.153  
2.138  
1.653  
1.638  
1.624  
1.248  
1.170  
0.986  
0.953  
0.938  
0.923  
-0.000

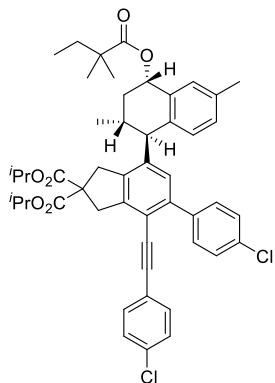

**5f**  
<sup>1</sup>H NMR

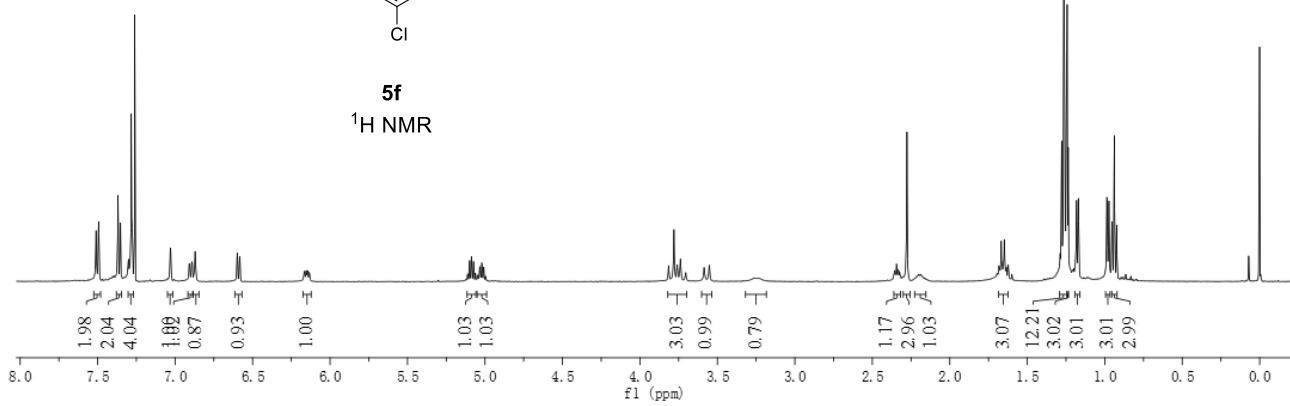

171.98  
163.59  
161.66  
155.13  
148.51  
145.60  
143.25  
133.38  
131.69  
131.07  
115.88  
115.70  
115.05  
114.87  
114.80  
112.90  
102.81  
94.79  
86.52  
59.56  
53.27  
41.53  
39.19  
39.08  
23.40

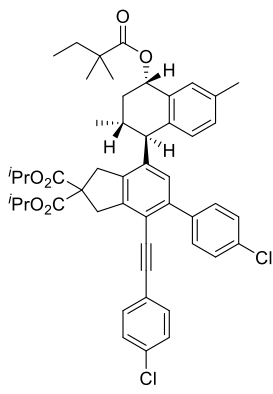

**5f**  
<sup>13</sup>C NMR

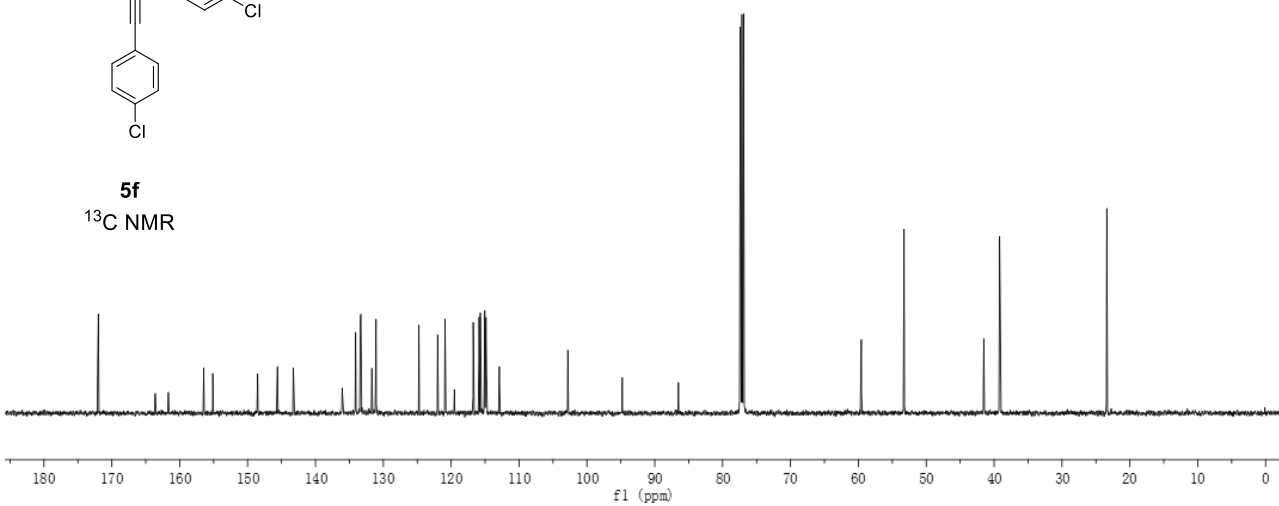

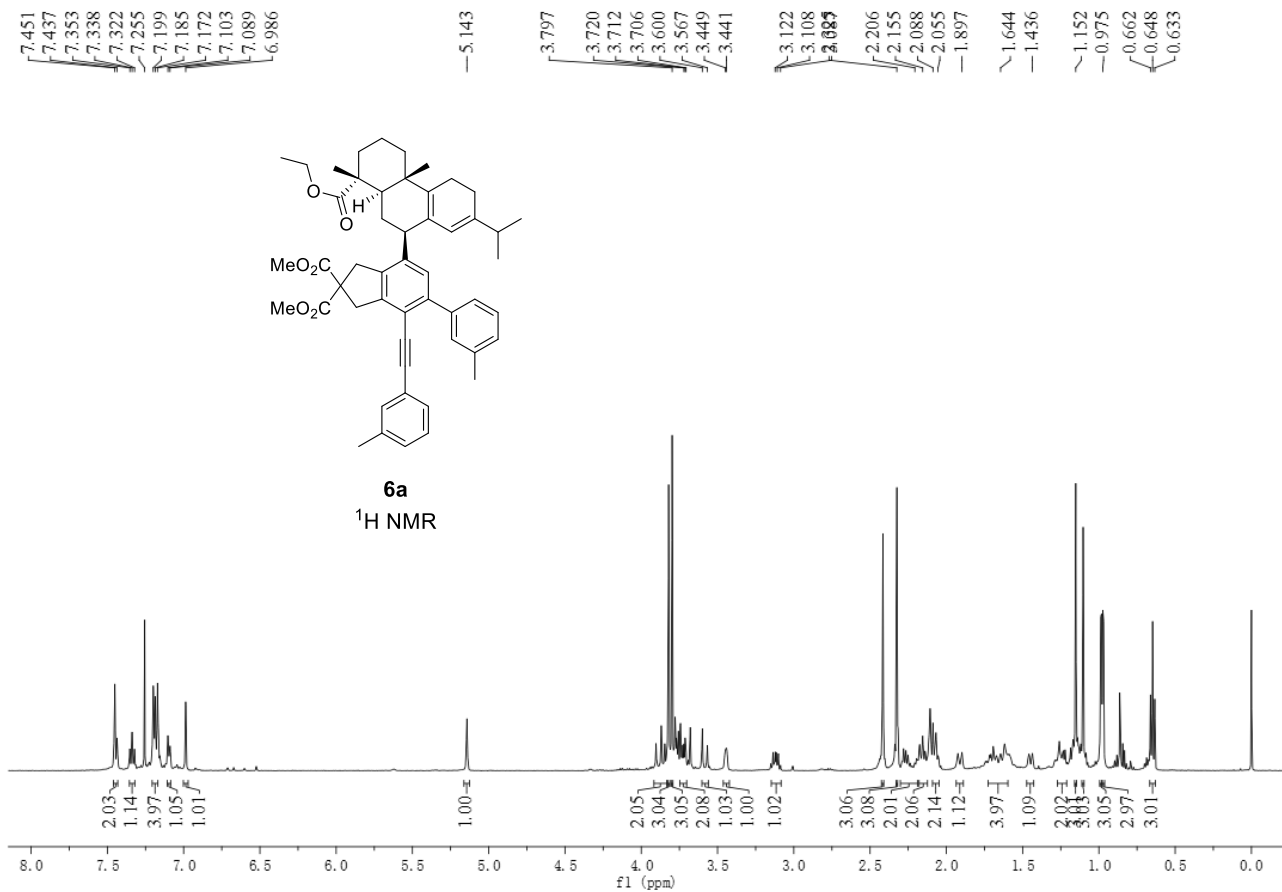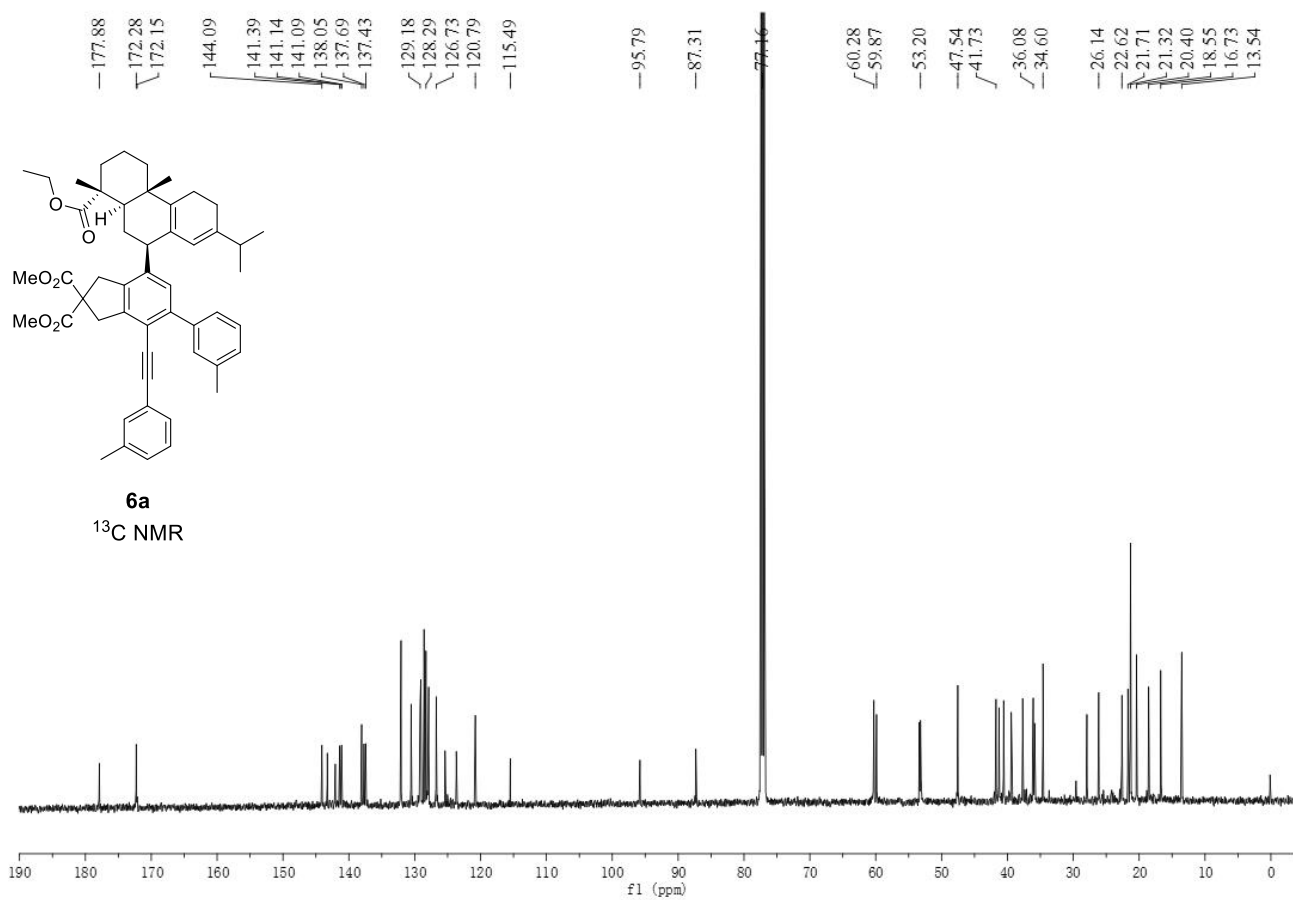



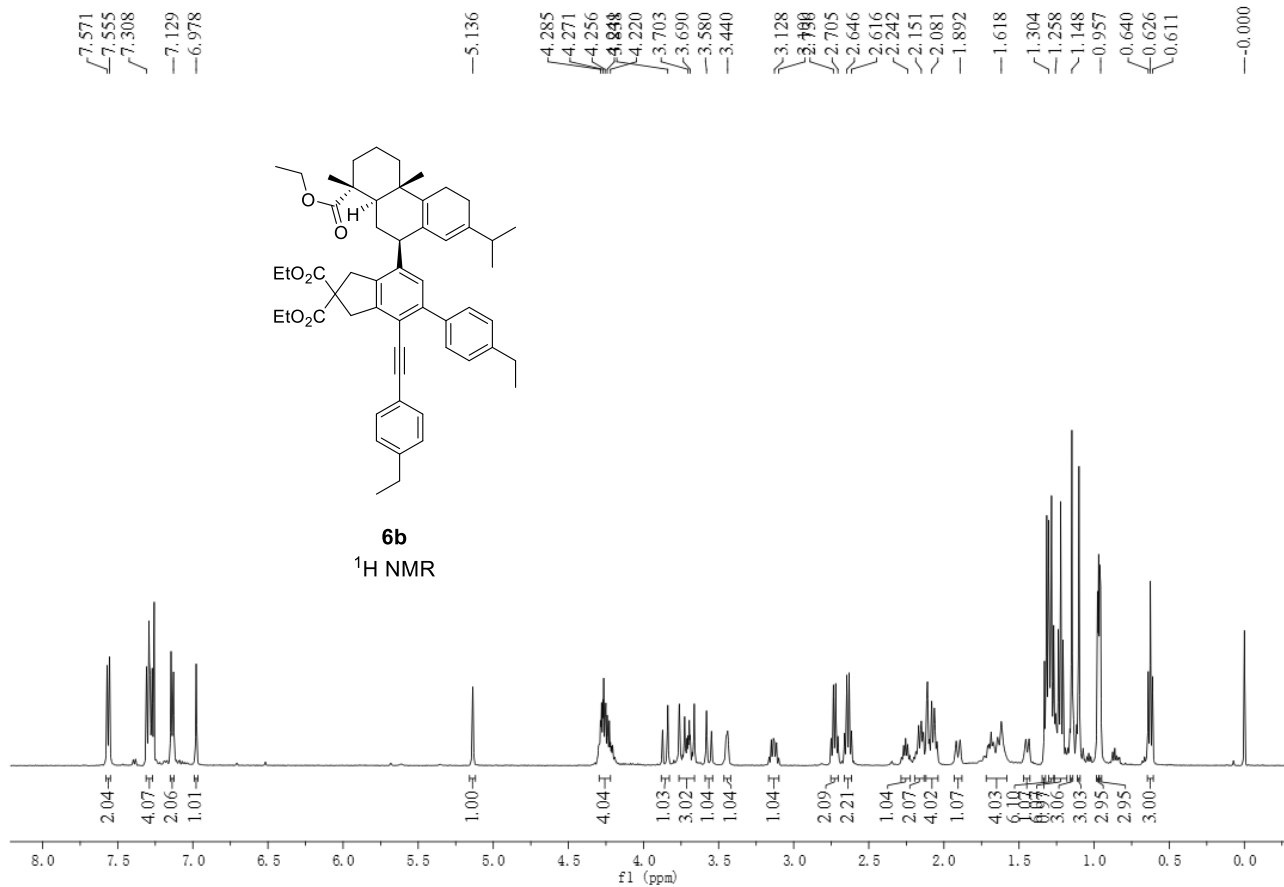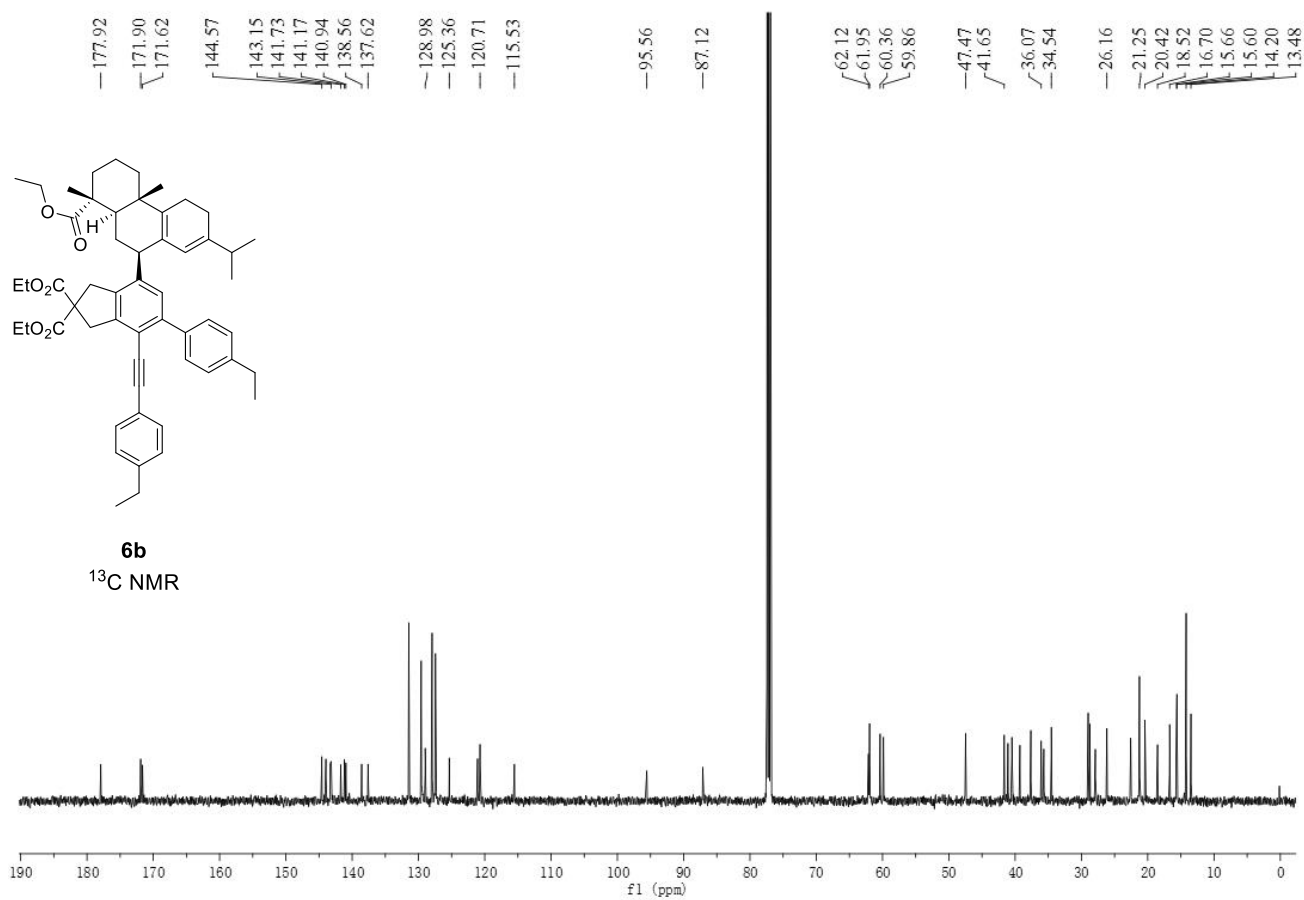

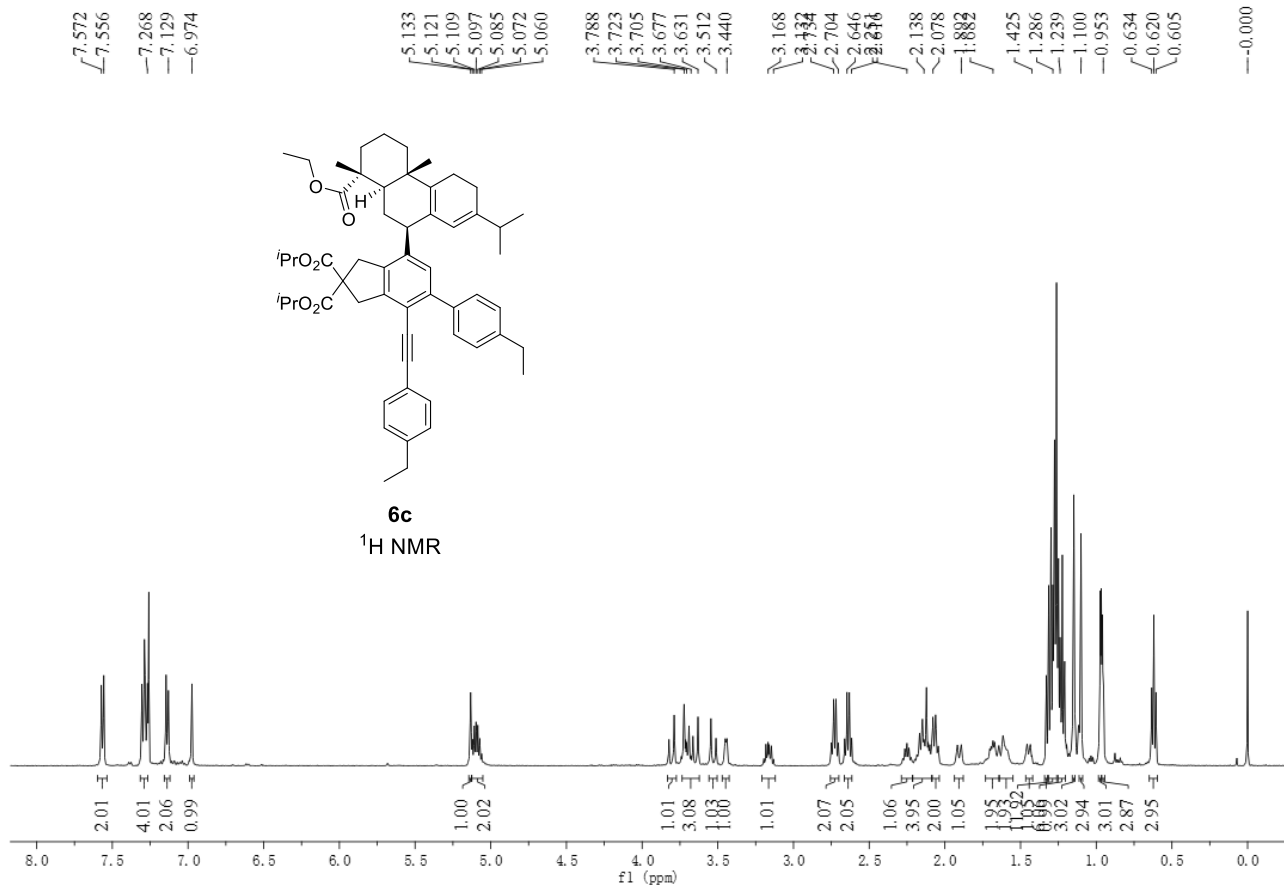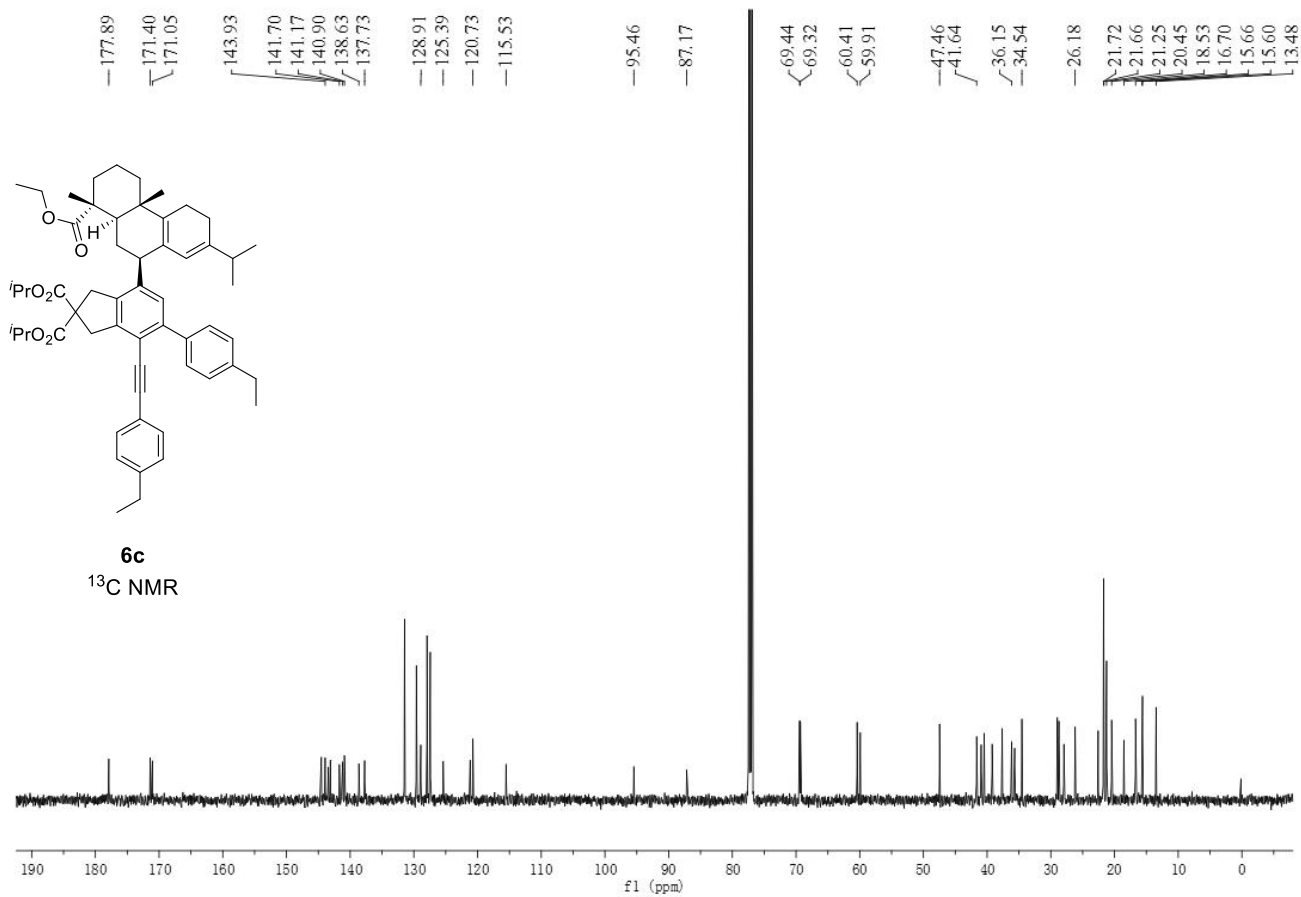

Supplement: d4ob01264j1.pdf [file d4ob01264j1.pdf]
